# Supplementary material for: Thunder-DDA-PASEF enables high-coverage immunopeptidomics and identifies HLA class-I presented SarsCov-2 spike protein epitopes
Source: Research Square preprint supplement (doi:10.21203/rs.3.rs-2625909/v1), 2023-03-09
Supplement: Supplementary file 2 [file e0902001cb3a57c4a413e61b.xlsx]

## Sheet: info
Content	Description
Experiment:	JY and Raji spike HLA class I ligands
Objective:	spike HLA class I ligandome of JY and Raji cells employing thunder DDA-PASEF from spike-transfected cells
Experiment_code:	06133
Content:	The tabs are organized as follows
ms_mhcpred_all_alleles	merged MS results and HLA-binding predictions from NetMHCpan 4.1
ms_mhcpred_merged_minrank	merged MS results and HLA-binding predictions from NetMHCpan 4.1, considering only the HLA allele with the lowest EL_rank
peptides_ms_summary	MS results summarized per peptide and Cell Line
validation	summary of the validation of MS identifications compared to synthetic peptides or PROSIT predicted spectra
peptides_ms	MS results, spike peptides identified in JY or Raji cells
iedb	Data downloaded from the Immune Epitope Database (IEDB) the 18 December 2022
mhcpred	HLA-binding predictions from NetMHCpan 4.1, via MhcVizPipe

## Sheet: ms_mhcpred_all_alleles
Cell.Line	Allele	Sequence	EL_score	EL_Rank	Aff_Score	Aff_Rank	Aff_nM	Binder	Cell.Line_allele	MatchedAllele	Condition	GeneOrganism	ProteinFirst	Seq.ID	start	end	Length	Length_range	Charge	PTM	Peptides.Modified	Peptides	n_BioReplicate	n_TechReplicate	ms2r_q_value_pep	Log2Area_mean	Log2Area_sd	ValidationType	Ratio_iRT	SA	PCC	iedb_Epitope.ID	iedb_Mapped.Start.Position	iedb_Mapped.End.Position	iedb_Identity	iedb_Subjects.Tested	iedb_Subjects.Responded	iedb_Assays.Positive	iedb_Assays.Negative	iedb_Response.Freq.	iedb_Lower.Bound.of.95..CI	iedb_Upper.Bound.of.95..CI
JY	HLA-B0702	SIIAYTMSL	0.112016	1.355	0.394094	1.011	703.29	WB	JY alleles	TRUE	JY_S	SPIKE_SARS2	P0DTC2	s0691-0699	691	699	9	8 to 13 AAs	1	None; Oxidation (M)	SIIAYTMSL; SIIAYTM(+15.99)SL	SIIAYTMSL	2	6	0.000228728	9.04343	0.994	Standard	1	0.71	0.8	1309137	691	699	100%	162	74	12	4	0.46	0.38	0.53
JY	HLA-B0702	RLQSLQTYV	0.004845	7.273	0.128973	7.82	12386	NB	JY alleles	TRUE	JY_S	SPIKE_SARS2	P0DTC2	s1000-1008	1000	1008	9	8 to 13 AAs	2	None	RLQSLQTYV	RLQSLQTYV	1	1	0.00747644	#NUM!		Standard	1	0.84	0.96	54725	1000	1008	100%	195	47	11	5	0.24	0.19	0.31
JY	HLA-B0702	RLDKVEAEV	0.003905	8.04	0.071875	18.199	22973.7	NB	JY alleles	TRUE	JY_S	SPIKE_SARS2	P0DTC2	s0983-0991	983	991	9	8 to 13 AAs	2	None	RLDKVEAEV	RLDKVEAEV	2	4	0.000874682	11.454	0.279281	Standard	1	0.86	0.97	54507	983	991	100%	81	36	8	2	0.44	0.34	0.55
JY	HLA-B0702	APHGVVFL	0.572123	0.311	0.408214	0.928	603.65	SB	JY alleles	TRUE	JY_S	SPIKE_SARS2	P0DTC2	s1056-1063	1056	1063	8	8 to 13 AAs	1	None	APHGVVFL	APHGVVFL	1	2	0.00031263	10.7084	1.08716	Standard	1	0.75	0.85	1330420	1056	1063	100%	6	2	2	0	0.33	0.06	0.71
JY	HLA-B0702	IPTNFTISV	0.472945	0.418	0.516024	0.472	188.01	SB	JY alleles	TRUE	JY_S	SPIKE_SARS2	P0DTC2	s0714-0722	714	722	9	8 to 13 AAs	1	None	IPTNFTISV	IPTNFTISV	2	5	0.00616349	8.44266	0.056434	PROSIT		0.8	0.93	1318845	714	722	100%	15	3	3	1	0.2	0.06	0.43
JY	HLA-C0702	SIIAYTMSL	0.035421	1.279	0.354507	0.495	1079.33	WB	JY alleles	TRUE	JY_S	SPIKE_SARS2	P0DTC2	s0691-0699	691	699	9	8 to 13 AAs	1	None; Oxidation (M)	SIIAYTMSL; SIIAYTM(+15.99)SL	SIIAYTMSL	2	6	0.000228728	9.04343	0.994	Standard	1	0.71	0.8	1309137	691	699	100%	162	74	12	4	0.46	0.38	0.53
JY	HLA-C0702	RLQSLQTYV	0.001864	7.251	0.141945	5.711	10764	NB	JY alleles	TRUE	JY_S	SPIKE_SARS2	P0DTC2	s1000-1008	1000	1008	9	8 to 13 AAs	2	None	RLQSLQTYV	RLQSLQTYV	1	1	0.00747644	#NUM!		Standard	1	0.84	0.96	54725	1000	1008	100%	195	47	11	5	0.24	0.19	0.31
JY	HLA-C0702	RLDKVEAEV	0.001682	7.597	0.069925	18.834	23463.6	NB	JY alleles	TRUE	JY_S	SPIKE_SARS2	P0DTC2	s0983-0991	983	991	9	8 to 13 AAs	2	None	RLDKVEAEV	RLDKVEAEV	2	4	0.000874682	11.454	0.279281	Standard	1	0.86	0.97	54507	983	991	100%	81	36	8	2	0.44	0.34	0.55
JY	HLA-C0702	APHGVVFL	0.000598	12.37	0.05953	23.512	26256.7	NB	JY alleles	TRUE	JY_S	SPIKE_SARS2	P0DTC2	s1056-1063	1056	1063	8	8 to 13 AAs	1	None	APHGVVFL	APHGVVFL	1	2	0.00031263	10.7084	1.08716	Standard	1	0.75	0.85	1330420	1056	1063	100%	6	2	2	0	0.33	0.06	0.71
JY	HLA-C0702	IPTNFTISV	0.003274	5.472	0.133769	6.399	11759.6	NB	JY alleles	TRUE	JY_S	SPIKE_SARS2	P0DTC2	s0714-0722	714	722	9	8 to 13 AAs	1	None	IPTNFTISV	IPTNFTISV	2	5	0.00616349	8.44266	0.056434	PROSIT		0.8	0.93	1318845	714	722	100%	15	3	3	1	0.2	0.06	0.43
JY	HLA-A0201	SIIAYTMSL	0.580032	0.3	0.721492	0.294	20.36	SB	JY alleles	TRUE	JY_S	SPIKE_SARS2	P0DTC2	s0691-0699	691	699	9	8 to 13 AAs	1	None; Oxidation (M)	SIIAYTMSL; SIIAYTM(+15.99)SL	SIIAYTMSL	2	6	0.000228728	9.04343	0.994	Standard	1	0.71	0.8	1309137	691	699	100%	162	74	12	4	0.46	0.38	0.53
JY	HLA-A0201	RLQSLQTYV	0.87376	0.062	0.770923	0.161	11.92	SB	JY alleles	TRUE	JY_S	SPIKE_SARS2	P0DTC2	s1000-1008	1000	1008	9	8 to 13 AAs	2	None	RLQSLQTYV	RLQSLQTYV	1	1	0.00747644	#NUM!		Standard	1	0.84	0.96	54725	1000	1008	100%	195	47	11	5	0.24	0.19	0.31
JY	HLA-A0201	RLDKVEAEV	0.825045	0.09	0.644689	0.618	46.73	SB	JY alleles	TRUE	JY_S	SPIKE_SARS2	P0DTC2	s0983-0991	983	991	9	8 to 13 AAs	2	None	RLDKVEAEV	RLDKVEAEV	2	4	0.000874682	11.454	0.279281	Standard	1	0.86	0.97	54507	983	991	100%	81	36	8	2	0.44	0.34	0.55
JY	HLA-A0201	APHGVVFL	0.000312	27.806	0.044344	45.198	30945.6	NB	JY alleles	TRUE	JY_S	SPIKE_SARS2	P0DTC2	s1056-1063	1056	1063	8	8 to 13 AAs	1	None	APHGVVFL	APHGVVFL	1	2	0.00031263	10.7084	1.08716	Standard	1	0.75	0.85	1330420	1056	1063	100%	6	2	2	0	0.33	0.06	0.71
JY	HLA-A0201	IPTNFTISV	0.00469	9.452	0.160093	13.56	8845	NB	JY alleles	TRUE	JY_S	SPIKE_SARS2	P0DTC2	s0714-0722	714	722	9	8 to 13 AAs	1	None	IPTNFTISV	IPTNFTISV	2	5	0.00616349	8.44266	0.056434	PROSIT		0.8	0.93	1318845	714	722	100%	15	3	3	1	0.2	0.06	0.43
Raji	HLA-B1510	LYNSASFSTFK	1e-05	56.25	0.016394	39.321	41873.1	NB	Raji alleles	TRUE	Raji_S	SPIKE_SARS2	P0DTC2	s0368-0378	368	378	11	8 to 13 AAs	1	None	LYNSASFSTFK	LYNSASFSTFK	1	1	0.0215782	5.59702		PROSIT		0.51	0.53
Raji	HLA-B1510	YGVSPTKL	0.004979	4.443	0.036217	13.705	33789.9	NB	Raji alleles	TRUE	Raji_S	SPIKE_SARS2	P0DTC2	s0380-0387	380	387	8	8 to 13 AAs	2	None	YGVSPTKL	YGVSPTKL	2	4	0.000348238	8.17302	2.18166	PROSIT		0.67	0.82
Raji	HLA-B1510	VTYVPAQEK	8.6e-05	28.889	0.011101	56.82	44341.1	NB	Raji alleles	TRUE	Raji_S	SPIKE_SARS2	P0DTC2	s1065-1073	1065	1073	9	8 to 13 AAs	2	None	VTYVPAQEK	VTYVPAQEK	2	5	0	12.4685	1.29921	Standard	1	0.94	1	1310928	1065	1073	100%	36	2	2	3	0.06	0.01	0.16
Raji	HLA-B1510	GVYFASTEK	6.2e-05	32.4	0.011311	55.917	44240.5	NB	Raji alleles	TRUE	Raji_S	SPIKE_SARS2	P0DTC2	s0089-0097	89	97	9	8 to 13 AAs	1	None	GVYFASTEK	GVYFASTEK	2	5	0.000291503	9.9047	1.53395	PROSIT		0.79	0.89	1312627	89	97	100%	74	16	7	1	0.22	0.14	0.32
Raji	HLA-B1510	VYDPLQPEL	0.293057	0.165	0.130967	1.121	12121.6	SB	Raji alleles	TRUE	Raji_S	SPIKE_SARS2	P0DTC2	s1137-1145	1137	1145	9	8 to 13 AAs	1	None	VYDPLQPEL	VYDPLQPEL	2	6	8.71232e-05	13.669	0.832357	Standard	1	0.94	1	71996	1137	1145	100%	19	1	1	1	0.05	0	0.22
Raji	HLA-B1510	KCYGVSPTKL	0.000399	15.875	0.023678	25.278	38699.7	NB	Raji alleles	TRUE	Raji_S	SPIKE_SARS2	P0DTC2	s0378-0387	378	387	10	8 to 13 AAs	2	None; Cysteinylation; Acetylation (N-term); Cysteinylation	KCYGVSPTKL; KC(+119.00)YGVSPTKL; K(+42.01)C(+119.00)YGVSPTKL	KCYGVSPTKL	2	6	0	10.706	2.16313	NP				1630363	378	387	100%	5	0	0	1	0	0	0.43
Raji	HLA-B1510	TYVPAQEK	5.2e-05	34.5	0.008145	71.104	45782.2	NB	Raji alleles	TRUE	Raji_S	SPIKE_SARS2	P0DTC2	s1066-1073	1066	1073	8	8 to 13 AAs	1	None	TYVPAQEK	TYVPAQEK	1	1	0.000151492	9.31841		Standard	1	0.95	1
Raji	HLA-B1510	PLQPELDSF	0.000135	24.5	0.012958	49.654	43459.1	NB	Raji alleles	TRUE	Raji_S	SPIKE_SARS2	P0DTC2	s1140-1148	1140	1148	9	8 to 13 AAs	1	None	PLQPELDSF	PLQPELDSF	1	2	0.00760985	7.58353		PROSIT		0.71	0.86
Raji	HLA-B1510	RVYSTGSNVFQTR	7e-06	60	0.010355	60.033	44700.5	NB	Raji alleles	TRUE	Raji_S	SPIKE_SARS2	P0DTC2	s0634-0646	634	646	13	8 to 13 AAs	3	None	RVYSTGSNVFQTR	RVYSTGSNVFQTR	2	6	0	13.6759	3.13108	PROSIT		0.84	0.95
Raji	HLA-B1510	SIIAYTMSL	0.011831	2.649	0.140264	0.963	10961.6	NB	Raji alleles	TRUE	Raji_S	SPIKE_SARS2	P0DTC2	s0691-0699	691	699	9	8 to 13 AAs	1	None; Oxidation (M)	SIIAYTMSL; SIIAYTM(+15.99)SL	SIIAYTMSL	2	6	0	11.6613	1.73362	Standard	1	0.89	0.97	1309137	691	699	100%	162	74	12	4	0.46	0.38	0.53
Raji	HLA-B1510	SASFSTFK	1.7e-05	48.5	0.009031	66.427	45345.4	NB	Raji alleles	TRUE	Raji_S	SPIKE_SARS2	P0DTC2	s0371-0378	371	378	8	8 to 13 AAs	1	None	SASFSTFK	SASFSTFK	2	2	0.00165581	10.7441	2.00901	PROSIT		0.83	0.93
Raji	HLA-B1510	AIHVSGTNGTK	1.2e-05	53.75	0.010172	60.899	44789.1	NB	Raji alleles	TRUE	Raji_S	SPIKE_SARS2	P0DTC2	s0067-0077	67	77	11	8 to 13 AAs	2	None	AIHVSGTNGTK	AIHVSGTNGTK	2	5	0	8.78582	1.93964	PROSIT		0.4	0.47
Raji	HLA-B1510	GVLTESNKK	1e-05	56.25	0.004485	91.96	47631.6	NB	Raji alleles	TRUE	Raji_S	SPIKE_SARS2	P0DTC2	s0550-0558	550	558	9	8 to 13 AAs	2	None	GVLTESNKK	GVLTESNKK	1	1	0.015959	7.25541		PROSIT		0.81	0.94	1547617	550	558	100%	11	0	0	2	0	0	0.23
Raji	HLA-B1510	VLYNSASFSTFK	1e-06	90	0.012183	52.528	43825.1	NB	Raji alleles	TRUE	Raji_S	SPIKE_SARS2	P0DTC2	s0367-0378	367	378	12	8 to 13 AAs	2	None	VLYNSASFSTFK	VLYNSASFSTFK	2	5	0	14.5088	1.1654	PROSIT		0.81	0.94	1526436	367	378	100%	2	2	2	0	1	0.22	1
Raji	HLA-B1510	PLQPELDSFK	2e-06	80	0.005071	88.945	47330.6	NB	Raji alleles	TRUE	Raji_S	SPIKE_SARS2	P0DTC2	s1140-1149	1140	1149	10	8 to 13 AAs	2	None	PLQPELDSFK	PLQPELDSFK	2	4	0	8.865	0.209326	PROSIT		0.71	0.88
Raji	HLA-B1510	NSASFSTFK	2.8e-05	42	0.016082	40.144	42014.7	NB	Raji alleles	TRUE	Raji_S	SPIKE_SARS2	P0DTC2	s0370-0378	370	378	9	8 to 13 AAs	1	None	NSASFSTFK	NSASFSTFK	2	2	8.71232e-05	10.608	2.23818	PROSIT		0.76	0.86	1313244	370	378	100%	23	3	3	2	0.13	0.03	0.3
Raji	HLA-B1510	NRALTGIAV	0.246111	0.203	0.26241	0.182	2923.57	SB	Raji alleles	TRUE	Raji_S	SPIKE_SARS2	P0DTC2	s0764-0772	764	772	9	8 to 13 AAs	2	None	NRALTGIAV	NRALTGIAV	2	4	0.00195262	10.6192	1.00314	Standard	1	0.93	0.99
Raji	HLA-B1510	TLKSFTVEK	9e-05	28.444	0.013558	47.632	43177.9	NB	Raji alleles	TRUE	Raji_S	SPIKE_SARS2	P0DTC2	s0302-0310	302	310	9	8 to 13 AAs	2	None	TLKSFTVEK	TLKSFTVEK	1	3	0	6.5803	0.75057	PROSIT		0.71	0.87	1313756	302	310	100%	21	1	1	2	0.05	0	0.2
Raji	HLA-B1510	RQIAPGQTGK	0.000255	19.125	0.021732	28.275	39523.2	NB	Raji alleles	TRUE	Raji_S	SPIKE_SARS2	P0DTC2	s0408-0417	408	417	10	8 to 13 AAs	2	None	RQIAPGQTGK	RQIAPGQTGK	2	6	0	8.9873	1.34055	PROSIT		0.63	0.76	1330580	408	417	100%	10	0	0	1	0	0	0.25
Raji	HLA-C0304	LYNSASFSTFK	4e-06	47	0.025153	37.303	38087	NB	Raji alleles	TRUE	Raji_S	SPIKE_SARS2	P0DTC2	s0368-0378	368	378	11	8 to 13 AAs	1	None	LYNSASFSTFK	LYNSASFSTFK	1	1	0.0215782	5.59702		PROSIT		0.51	0.53
Raji	HLA-C0304	YGVSPTKL	0.114769	0.87	0.222762	3.337	4489.71	WB	Raji alleles	TRUE	Raji_S	SPIKE_SARS2	P0DTC2	s0380-0387	380	387	8	8 to 13 AAs	2	None	YGVSPTKL	YGVSPTKL	2	4	0.000348238	8.17302	2.18166	PROSIT		0.67	0.82
Raji	HLA-C0304	VTYVPAQEK	0.001693	7.328	0.069779	15.18	23500.7	NB	Raji alleles	TRUE	Raji_S	SPIKE_SARS2	P0DTC2	s1065-1073	1065	1073	9	8 to 13 AAs	2	None	VTYVPAQEK	VTYVPAQEK	2	5	0	12.4685	1.29921	Standard	1	0.94	1	1310928	1065	1073	100%	36	2	2	3	0.06	0.01	0.16
Raji	HLA-C0304	GVYFASTEK	0.00012	18.524	0.03896	26.394	32801.8	NB	Raji alleles	TRUE	Raji_S	SPIKE_SARS2	P0DTC2	s0089-0097	89	97	9	8 to 13 AAs	1	None	GVYFASTEK	GVYFASTEK	2	5	0.000291503	9.9047	1.53395	PROSIT		0.79	0.89	1312627	89	97	100%	74	16	7	1	0.22	0.14	0.32
Raji	HLA-C0304	VYDPLQPEL	0.281573	0.411	0.209824	3.688	5164.32	SB	Raji alleles	TRUE	Raji_S	SPIKE_SARS2	P0DTC2	s1137-1145	1137	1145	9	8 to 13 AAs	1	None	VYDPLQPEL	VYDPLQPEL	2	6	8.71232e-05	13.669	0.832357	Standard	1	0.94	1	71996	1137	1145	100%	19	1	1	1	0.05	0	0.22
Raji	HLA-C0304	KCYGVSPTKL	0.003107	5.789	0.110737	9.047	15087.6	NB	Raji alleles	TRUE	Raji_S	SPIKE_SARS2	P0DTC2	s0378-0387	378	387	10	8 to 13 AAs	2	None; Cysteinylation; Acetylation (N-term); Cysteinylation	KCYGVSPTKL; KC(+119.00)YGVSPTKL; K(+42.01)C(+119.00)YGVSPTKL	KCYGVSPTKL	2	6	0	10.706	2.16313	NP				1630363	378	387	100%	5	0	0	1	0	0	0.43
Raji	HLA-C0304	TYVPAQEK	5e-06	45	0.009444	67.377	45143.3	NB	Raji alleles	TRUE	Raji_S	SPIKE_SARS2	P0DTC2	s1066-1073	1066	1073	8	8 to 13 AAs	1	None	TYVPAQEK	TYVPAQEK	1	1	0.000151492	9.31841		Standard	1	0.95	1
Raji	HLA-C0304	PLQPELDSF	4.4e-05	25	0.017611	47.6	41325.3	NB	Raji alleles	TRUE	Raji_S	SPIKE_SARS2	P0DTC2	s1140-1148	1140	1148	9	8 to 13 AAs	1	None	PLQPELDSF	PLQPELDSF	1	2	0.00760985	7.58353		PROSIT		0.71	0.86
Raji	HLA-C0304	RVYSTGSNVFQTR	3e-06	50	0.022973	39.799	38996	NB	Raji alleles	TRUE	Raji_S	SPIKE_SARS2	P0DTC2	s0634-0646	634	646	13	8 to 13 AAs	3	None	RVYSTGSNVFQTR	RVYSTGSNVFQTR	2	6	0	13.6759	3.13108	PROSIT		0.84	0.95
Raji	HLA-C0304	SIIAYTMSL	0.431135	0.268	0.704794	0.111	24.39	SB	Raji alleles	TRUE	Raji_S	SPIKE_SARS2	P0DTC2	s0691-0699	691	699	9	8 to 13 AAs	1	None; Oxidation (M)	SIIAYTMSL; SIIAYTM(+15.99)SL	SIIAYTMSL	2	6	0	11.6613	1.73362	Standard	1	0.89	0.97	1309137	691	699	100%	162	74	12	4	0.46	0.38	0.53
Raji	HLA-C0304	SASFSTFK	1.6e-05	33	0.022758	40.065	39086.9	NB	Raji alleles	TRUE	Raji_S	SPIKE_SARS2	P0DTC2	s0371-0378	371	378	8	8 to 13 AAs	1	None	SASFSTFK	SASFSTFK	2	2	0.00165581	10.7441	2.00901	PROSIT		0.83	0.93
Raji	HLA-C0304	AIHVSGTNGTK	1e-06	70	0.006815	77.18	46445.8	NB	Raji alleles	TRUE	Raji_S	SPIKE_SARS2	P0DTC2	s0067-0077	67	77	11	8 to 13 AAs	2	None	AIHVSGTNGTK	AIHVSGTNGTK	2	5	0	8.78582	1.93964	PROSIT		0.4	0.47
Raji	HLA-C0304	GVLTESNKK	4e-06	47	0.006769	77.374	46468.9	NB	Raji alleles	TRUE	Raji_S	SPIKE_SARS2	P0DTC2	s0550-0558	550	558	9	8 to 13 AAs	2	None	GVLTESNKK	GVLTESNKK	1	1	0.015959	7.25541		PROSIT		0.81	0.94	1547617	550	558	100%	11	0	0	2	0	0	0.23
Raji	HLA-C0304	VLYNSASFSTFK	1e-06	70	0.026724	35.653	37445.1	NB	Raji alleles	TRUE	Raji_S	SPIKE_SARS2	P0DTC2	s0367-0378	367	378	12	8 to 13 AAs	2	None	VLYNSASFSTFK	VLYNSASFSTFK	2	5	0	14.5088	1.1654	PROSIT		0.81	0.94	1526436	367	378	100%	2	2	2	0	1	0.22	1
Raji	HLA-C0304	PLQPELDSFK	0	100	0.005609	82.454	47055.8	NB	Raji alleles	TRUE	Raji_S	SPIKE_SARS2	P0DTC2	s1140-1149	1140	1149	10	8 to 13 AAs	2	None	PLQPELDSFK	PLQPELDSFK	2	4	0	8.865	0.209326	PROSIT		0.71	0.88
Raji	HLA-C0304	NSASFSTFK	0.000128	18.143	0.052499	20.195	28332.1	NB	Raji alleles	TRUE	Raji_S	SPIKE_SARS2	P0DTC2	s0370-0378	370	378	9	8 to 13 AAs	1	None	NSASFSTFK	NSASFSTFK	2	2	8.71232e-05	10.608	2.23818	PROSIT		0.76	0.86	1313244	370	378	100%	23	3	3	2	0.13	0.03	0.3
Raji	HLA-C0304	NRALTGIAV	0.00079	9.779	0.096247	10.659	17648.5	NB	Raji alleles	TRUE	Raji_S	SPIKE_SARS2	P0DTC2	s0764-0772	764	772	9	8 to 13 AAs	2	None	NRALTGIAV	NRALTGIAV	2	4	0.00195262	10.6192	1.00314	Standard	1	0.93	0.99
Raji	HLA-C0304	TLKSFTVEK	6.6e-05	22.222	0.024453	38.055	38376.6	NB	Raji alleles	TRUE	Raji_S	SPIKE_SARS2	P0DTC2	s0302-0310	302	310	9	8 to 13 AAs	2	None	TLKSFTVEK	TLKSFTVEK	1	3	0	6.5803	0.75057	PROSIT		0.71	0.87	1313756	302	310	100%	21	1	1	2	0.05	0	0.2
Raji	HLA-C0304	RQIAPGQTGK	4.5e-05	24.857	0.022955	39.821	39003.6	NB	Raji alleles	TRUE	Raji_S	SPIKE_SARS2	P0DTC2	s0408-0417	408	417	10	8 to 13 AAs	2	None	RQIAPGQTGK	RQIAPGQTGK	2	6	0	8.9873	1.34055	PROSIT		0.63	0.76	1330580	408	417	100%	10	0	0	1	0	0	0.25
Raji	HLA-C0401	LYNSASFSTFK	0.000229	27.05	0.064121	12.077	24984.3	NB	Raji alleles	TRUE	Raji_S	SPIKE_SARS2	P0DTC2	s0368-0378	368	378	11	8 to 13 AAs	1	None	LYNSASFSTFK	LYNSASFSTFK	1	1	0.0215782	5.59702		PROSIT		0.51	0.53
Raji	HLA-C0401	YGVSPTKL	0.021494	2.138	0.073048	8.708	22684	NB	Raji alleles	TRUE	Raji_S	SPIKE_SARS2	P0DTC2	s0380-0387	380	387	8	8 to 13 AAs	2	None	YGVSPTKL	YGVSPTKL	2	4	0.000348238	8.17302	2.18166	PROSIT		0.67	0.82
Raji	HLA-C0401	VTYVPAQEK	0.004793	5.771	0.053422	17.985	28050.6	NB	Raji alleles	TRUE	Raji_S	SPIKE_SARS2	P0DTC2	s1065-1073	1065	1073	9	8 to 13 AAs	2	None	VTYVPAQEK	VTYVPAQEK	2	5	0	12.4685	1.29921	Standard	1	0.94	1	1310928	1065	1073	100%	36	2	2	3	0.06	0.01	0.16
Raji	HLA-C0401	GVYFASTEK	0.000543	18.646	0.049817	20.616	29166.3	NB	Raji alleles	TRUE	Raji_S	SPIKE_SARS2	P0DTC2	s0089-0097	89	97	9	8 to 13 AAs	1	None	GVYFASTEK	GVYFASTEK	2	5	0.000291503	9.9047	1.53395	PROSIT		0.79	0.89	1312627	89	97	100%	74	16	7	1	0.22	0.14	0.32
Raji	HLA-C0401	VYDPLQPEL	0.98901	0.001	0.51678	0.009	186.48	SB	Raji alleles	TRUE	Raji_S	SPIKE_SARS2	P0DTC2	s1137-1145	1137	1145	9	8 to 13 AAs	1	None	VYDPLQPEL	VYDPLQPEL	2	6	8.71232e-05	13.669	0.832357	Standard	1	0.94	1	71996	1137	1145	100%	19	1	1	1	0.05	0	0.22
Raji	HLA-C0401	KCYGVSPTKL	0.0019	9.926	0.055742	16.48	27355.2	NB	Raji alleles	TRUE	Raji_S	SPIKE_SARS2	P0DTC2	s0378-0387	378	387	10	8 to 13 AAs	2	None; Cysteinylation; Acetylation (N-term); Cysteinylation	KCYGVSPTKL; KC(+119.00)YGVSPTKL; K(+42.01)C(+119.00)YGVSPTKL	KCYGVSPTKL	2	6	0	10.706	2.16313	NP				1630363	378	387	100%	5	0	0	1	0	0	0.43
Raji	HLA-C0401	TYVPAQEK	0.000796	15.595	0.028882	46.308	36580.9	NB	Raji alleles	TRUE	Raji_S	SPIKE_SARS2	P0DTC2	s1066-1073	1066	1073	8	8 to 13 AAs	1	None	TYVPAQEK	TYVPAQEK	1	1	0.000151492	9.31841		Standard	1	0.95	1
Raji	HLA-C0401	PLQPELDSF	0.004988	5.637	0.045971	23.793	30405.6	NB	Raji alleles	TRUE	Raji_S	SPIKE_SARS2	P0DTC2	s1140-1148	1140	1148	9	8 to 13 AAs	1	None	PLQPELDSF	PLQPELDSF	1	2	0.00760985	7.58353		PROSIT		0.71	0.86
Raji	HLA-C0401	RVYSTGSNVFQTR	8.3e-05	39.833	0.044206	25.413	30991.8	NB	Raji alleles	TRUE	Raji_S	SPIKE_SARS2	P0DTC2	s0634-0646	634	646	13	8 to 13 AAs	3	None	RVYSTGSNVFQTR	RVYSTGSNVFQTR	2	6	0	13.6759	3.13108	PROSIT		0.84	0.95
Raji	HLA-C0401	SIIAYTMSL	0.025222	1.868	0.145772	1.007	10327.4	WB	Raji alleles	TRUE	Raji_S	SPIKE_SARS2	P0DTC2	s0691-0699	691	699	9	8 to 13 AAs	1	None; Oxidation (M)	SIIAYTMSL; SIIAYTM(+15.99)SL	SIIAYTMSL	2	6	0	11.6613	1.73362	Standard	1	0.89	0.97	1309137	691	699	100%	162	74	12	4	0.46	0.38	0.53
Raji	HLA-C0401	SASFSTFK	0.000184	29.562	0.041592	28.169	31880.9	NB	Raji alleles	TRUE	Raji_S	SPIKE_SARS2	P0DTC2	s0371-0378	371	378	8	8 to 13 AAs	1	None	SASFSTFK	SASFSTFK	2	2	0.00165581	10.7441	2.00901	PROSIT		0.83	0.93
Raji	HLA-C0401	AIHVSGTNGTK	4.1e-05	50.417	0.0212	63.691	39751.3	NB	Raji alleles	TRUE	Raji_S	SPIKE_SARS2	P0DTC2	s0067-0077	67	77	11	8 to 13 AAs	2	None	AIHVSGTNGTK	AIHVSGTNGTK	2	5	0	8.78582	1.93964	PROSIT		0.4	0.47
Raji	HLA-C0401	GVLTESNKK	0.000147	32.273	0.020023	66.847	40260.8	NB	Raji alleles	TRUE	Raji_S	SPIKE_SARS2	P0DTC2	s0550-0558	550	558	9	8 to 13 AAs	2	None	GVLTESNKK	GVLTESNKK	1	1	0.015959	7.25541		PROSIT		0.81	0.94	1547617	550	558	100%	11	0	0	2	0	0	0.23
Raji	HLA-C0401	VLYNSASFSTFK	5.1e-05	47	0.060849	13.661	25884.7	NB	Raji alleles	TRUE	Raji_S	SPIKE_SARS2	P0DTC2	s0367-0378	367	378	12	8 to 13 AAs	2	None	VLYNSASFSTFK	VLYNSASFSTFK	2	5	0	14.5088	1.1654	PROSIT		0.81	0.94	1526436	367	378	100%	2	2	2	0	1	0.22	1
Raji	HLA-C0401	PLQPELDSFK	7.3e-05	41.6	0.026527	51.115	37525	NB	Raji alleles	TRUE	Raji_S	SPIKE_SARS2	P0DTC2	s1140-1149	1140	1149	10	8 to 13 AAs	2	None	PLQPELDSFK	PLQPELDSFK	2	4	0	8.865	0.209326	PROSIT		0.71	0.88
Raji	HLA-C0401	NSASFSTFK	0.000899	14.718	0.086004	5.543	19717	NB	Raji alleles	TRUE	Raji_S	SPIKE_SARS2	P0DTC2	s0370-0378	370	378	9	8 to 13 AAs	1	None	NSASFSTFK	NSASFSTFK	2	2	8.71232e-05	10.608	2.23818	PROSIT		0.76	0.86	1313244	370	378	100%	23	3	3	2	0.13	0.03	0.3
Raji	HLA-C0401	NRALTGIAV	0.003885	6.52	0.085328	5.681	19861.7	NB	Raji alleles	TRUE	Raji_S	SPIKE_SARS2	P0DTC2	s0764-0772	764	772	9	8 to 13 AAs	2	None	NRALTGIAV	NRALTGIAV	2	4	0.00195262	10.6192	1.00314	Standard	1	0.93	0.99
Raji	HLA-C0401	TLKSFTVEK	0.003784	6.638	0.065963	11.262	24491.3	NB	Raji alleles	TRUE	Raji_S	SPIKE_SARS2	P0DTC2	s0302-0310	302	310	9	8 to 13 AAs	2	None	TLKSFTVEK	TLKSFTVEK	1	3	0	6.5803	0.75057	PROSIT		0.71	0.87	1313756	302	310	100%	21	1	1	2	0.05	0	0.2
Raji	HLA-C0401	RQIAPGQTGK	0.002667	8.221	0.058211	15.052	26634.1	NB	Raji alleles	TRUE	Raji_S	SPIKE_SARS2	P0DTC2	s0408-0417	408	417	10	8 to 13 AAs	2	None	RQIAPGQTGK	RQIAPGQTGK	2	6	0	8.9873	1.34055	PROSIT		0.63	0.76	1330580	408	417	100%	10	0	0	1	0	0	0.25
Raji	HLA-A0301	LYNSASFSTFK	0.075458	2.272	0.474145	0.831	295.79	NB	Raji alleles	TRUE	Raji_S	SPIKE_SARS2	P0DTC2	s0368-0378	368	378	11	8 to 13 AAs	1	None	LYNSASFSTFK	LYNSASFSTFK	1	1	0.0215782	5.59702		PROSIT		0.51	0.53
Raji	HLA-A0301	YGVSPTKL	2.2e-05	57.857	0.015043	86.12	42489.7	NB	Raji alleles	TRUE	Raji_S	SPIKE_SARS2	P0DTC2	s0380-0387	380	387	8	8 to 13 AAs	2	None	YGVSPTKL	YGVSPTKL	2	4	0.000348238	8.17302	2.18166	PROSIT		0.67	0.82
Raji	HLA-A0301	VTYVPAQEK	0.932408	0.027	0.660915	0.154	39.21	SB	Raji alleles	TRUE	Raji_S	SPIKE_SARS2	P0DTC2	s1065-1073	1065	1073	9	8 to 13 AAs	2	None	VTYVPAQEK	VTYVPAQEK	2	5	0	12.4685	1.29921	Standard	1	0.94	1	1310928	1065	1073	100%	36	2	2	3	0.06	0.01	0.16
Raji	HLA-A0301	GVYFASTEK	0.918399	0.034	0.727116	0.054	19.15	SB	Raji alleles	TRUE	Raji_S	SPIKE_SARS2	P0DTC2	s0089-0097	89	97	9	8 to 13 AAs	1	None	GVYFASTEK	GVYFASTEK	2	5	0.000291503	9.9047	1.53395	PROSIT		0.79	0.89	1312627	89	97	100%	74	16	7	1	0.22	0.14	0.32
Raji	HLA-A0301	VYDPLQPEL	0.009018	5.786	0.048264	34.179	29660.5	NB	Raji alleles	TRUE	Raji_S	SPIKE_SARS2	P0DTC2	s1137-1145	1137	1145	9	8 to 13 AAs	1	None	VYDPLQPEL	VYDPLQPEL	2	6	8.71232e-05	13.669	0.832357	Standard	1	0.94	1	71996	1137	1145	100%	19	1	1	1	0.05	0	0.22
Raji	HLA-A0301	KCYGVSPTKL	0.018071	4.331	0.142155	7.898	10739.6	NB	Raji alleles	TRUE	Raji_S	SPIKE_SARS2	P0DTC2	s0378-0387	378	387	10	8 to 13 AAs	2	None; Cysteinylation; Acetylation (N-term); Cysteinylation	KCYGVSPTKL; KC(+119.00)YGVSPTKL; K(+42.01)C(+119.00)YGVSPTKL	KCYGVSPTKL	2	6	0	10.706	2.16313	NP				1630363	378	387	100%	5	0	0	1	0	0	0.43
Raji	HLA-A0301	TYVPAQEK	0.016067	4.533	0.14793	7.459	10089.1	NB	Raji alleles	TRUE	Raji_S	SPIKE_SARS2	P0DTC2	s1066-1073	1066	1073	8	8 to 13 AAs	1	None	TYVPAQEK	TYVPAQEK	1	1	0.000151492	9.31841		Standard	1	0.95	1
Raji	HLA-A0301	PLQPELDSF	0.00014	29.846	0.022555	70.8	39172.8	NB	Raji alleles	TRUE	Raji_S	SPIKE_SARS2	P0DTC2	s1140-1148	1140	1148	9	8 to 13 AAs	1	None	PLQPELDSF	PLQPELDSF	1	2	0.00760985	7.58353		PROSIT		0.71	0.86
Raji	HLA-A0301	RVYSTGSNVFQTR	0.398774	0.638	0.467928	0.873	316.37	WB	Raji alleles	TRUE	Raji_S	SPIKE_SARS2	P0DTC2	s0634-0646	634	646	13	8 to 13 AAs	3	None	RVYSTGSNVFQTR	RVYSTGSNVFQTR	2	6	0	13.6759	3.13108	PROSIT		0.84	0.95
Raji	HLA-A0301	SIIAYTMSL	0.010084	5.506	0.19613	5.057	5989.09	NB	Raji alleles	TRUE	Raji_S	SPIKE_SARS2	P0DTC2	s0691-0699	691	699	9	8 to 13 AAs	1	None; Oxidation (M)	SIIAYTMSL; SIIAYTM(+15.99)SL	SIIAYTMSL	2	6	0	11.6613	1.73362	Standard	1	0.89	0.97	1309137	691	699	100%	162	74	12	4	0.46	0.38	0.53
Raji	HLA-A0301	SASFSTFK	0.012321	5.07	0.254399	3.396	3188.28	NB	Raji alleles	TRUE	Raji_S	SPIKE_SARS2	P0DTC2	s0371-0378	371	378	8	8 to 13 AAs	1	None	SASFSTFK	SASFSTFK	2	2	0.00165581	10.7441	2.00901	PROSIT		0.83	0.93
Raji	HLA-A0301	AIHVSGTNGTK	0.414262	0.607	0.419495	1.214	534.29	WB	Raji alleles	TRUE	Raji_S	SPIKE_SARS2	P0DTC2	s0067-0077	67	77	11	8 to 13 AAs	2	None	AIHVSGTNGTK	AIHVSGTNGTK	2	5	0	8.78582	1.93964	PROSIT		0.4	0.47
Raji	HLA-A0301	GVLTESNKK	0.452652	0.536	0.393382	1.43	708.73	WB	Raji alleles	TRUE	Raji_S	SPIKE_SARS2	P0DTC2	s0550-0558	550	558	9	8 to 13 AAs	2	None	GVLTESNKK	GVLTESNKK	1	1	0.015959	7.25541		PROSIT		0.81	0.94	1547617	550	558	100%	11	0	0	2	0	0	0.23
Raji	HLA-A0301	VLYNSASFSTFK	0.764316	0.152	0.813392	0.011	7.53	SB	Raji alleles	TRUE	Raji_S	SPIKE_SARS2	P0DTC2	s0367-0378	367	378	12	8 to 13 AAs	2	None	VLYNSASFSTFK	VLYNSASFSTFK	2	5	0	14.5088	1.1654	PROSIT		0.81	0.94	1526436	367	378	100%	2	2	2	0	1	0.22	1
Raji	HLA-A0301	PLQPELDSFK	0.028345	3.562	0.250071	3.483	3341.13	NB	Raji alleles	TRUE	Raji_S	SPIKE_SARS2	P0DTC2	s1140-1149	1140	1149	10	8 to 13 AAs	2	None	PLQPELDSFK	PLQPELDSFK	2	4	0	8.865	0.209326	PROSIT		0.71	0.88
Raji	HLA-A0301	NSASFSTFK	0.348642	0.742	0.562754	0.418	113.4	WB	Raji alleles	TRUE	Raji_S	SPIKE_SARS2	P0DTC2	s0370-0378	370	378	9	8 to 13 AAs	1	None	NSASFSTFK	NSASFSTFK	2	2	8.71232e-05	10.608	2.23818	PROSIT		0.76	0.86	1313244	370	378	100%	23	3	3	2	0.13	0.03	0.3
Raji	HLA-A0301	NRALTGIAV	8.2e-05	36.667	0.026997	62.21	37334.7	NB	Raji alleles	TRUE	Raji_S	SPIKE_SARS2	P0DTC2	s0764-0772	764	772	9	8 to 13 AAs	2	None	NRALTGIAV	NRALTGIAV	2	4	0.00195262	10.6192	1.00314	Standard	1	0.93	0.99
Raji	HLA-A0301	TLKSFTVEK	0.926974	0.03	0.705758	0.078	24.13	SB	Raji alleles	TRUE	Raji_S	SPIKE_SARS2	P0DTC2	s0302-0310	302	310	9	8 to 13 AAs	2	None	TLKSFTVEK	TLKSFTVEK	1	3	0	6.5803	0.75057	PROSIT		0.71	0.87	1313756	302	310	100%	21	1	1	2	0.05	0	0.2
Raji	HLA-A0301	RQIAPGQTGK	0.904489	0.04	0.639078	0.198	49.65	SB	Raji alleles	TRUE	Raji_S	SPIKE_SARS2	P0DTC2	s0408-0417	408	417	10	8 to 13 AAs	2	None	RQIAPGQTGK	RQIAPGQTGK	2	6	0	8.9873	1.34055	PROSIT		0.63	0.76	1330580	408	417	100%	10	0	0	1	0	0	0.25
JY	HLA-B1510	SIIAYTMSL	0.011831	2.649	0.140264	0.963	10961.6	NB	Raji alleles	FALSE	JY_S	SPIKE_SARS2	P0DTC2	s0691-0699	691	699	9	8 to 13 AAs	1	None; Oxidation (M)	SIIAYTMSL; SIIAYTM(+15.99)SL	SIIAYTMSL	2	6	0.000228728	9.04343	0.994	Standard	1	0.71	0.8	1309137	691	699	100%	162	74	12	4	0.46	0.38	0.53
JY	HLA-B1510	RLQSLQTYV	0.000674	12.574	0.028319	19.826	36804.4	NB	Raji alleles	FALSE	JY_S	SPIKE_SARS2	P0DTC2	s1000-1008	1000	1008	9	8 to 13 AAs	2	None	RLQSLQTYV	RLQSLQTYV	1	1	0.00747644	#NUM!		Standard	1	0.84	0.96	54725	1000	1008	100%	195	47	11	5	0.24	0.19	0.31
JY	HLA-B1510	RLDKVEAEV	0.001732	7.946	0.031377	17.115	35606.6	NB	Raji alleles	FALSE	JY_S	SPIKE_SARS2	P0DTC2	s0983-0991	983	991	9	8 to 13 AAs	2	None	RLDKVEAEV	RLDKVEAEV	2	4	0.000874682	11.454	0.279281	Standard	1	0.86	0.97	54507	983	991	100%	81	36	8	2	0.44	0.34	0.55
JY	HLA-B1510	APHGVVFL	0.004013	4.979	0.033264	15.652	34887	NB	Raji alleles	FALSE	JY_S	SPIKE_SARS2	P0DTC2	s1056-1063	1056	1063	8	8 to 13 AAs	1	None	APHGVVFL	APHGVVFL	1	2	0.00031263	10.7084	1.08716	Standard	1	0.75	0.85	1330420	1056	1063	100%	6	2	2	0	0.33	0.06	0.71
JY	HLA-B1510	IPTNFTISV	0.010852	2.8	0.084411	2.906	20059.7	NB	Raji alleles	FALSE	JY_S	SPIKE_SARS2	P0DTC2	s0714-0722	714	722	9	8 to 13 AAs	1	None	IPTNFTISV	IPTNFTISV	2	5	0.00616349	8.44266	0.056434	PROSIT		0.8	0.93	1318845	714	722	100%	15	3	3	1	0.2	0.06	0.43
JY	HLA-C0304	SIIAYTMSL	0.431135	0.268	0.704794	0.111	24.39	SB	Raji alleles	FALSE	JY_S	SPIKE_SARS2	P0DTC2	s0691-0699	691	699	9	8 to 13 AAs	1	None; Oxidation (M)	SIIAYTMSL; SIIAYTM(+15.99)SL	SIIAYTMSL	2	6	0.000228728	9.04343	0.994	Standard	1	0.71	0.8	1309137	691	699	100%	162	74	12	4	0.46	0.38	0.53
JY	HLA-C0304	RLQSLQTYV	0.000625	10.669	0.087575	11.84	19384.6	NB	Raji alleles	FALSE	JY_S	SPIKE_SARS2	P0DTC2	s1000-1008	1000	1008	9	8 to 13 AAs	2	None	RLQSLQTYV	RLQSLQTYV	1	1	0.00747644	#NUM!		Standard	1	0.84	0.96	54725	1000	1008	100%	195	47	11	5	0.24	0.19	0.31
JY	HLA-C0304	RLDKVEAEV	0.001158	8.495	0.07269	14.55	22772	NB	Raji alleles	FALSE	JY_S	SPIKE_SARS2	P0DTC2	s0983-0991	983	991	9	8 to 13 AAs	2	None	RLDKVEAEV	RLDKVEAEV	2	4	0.000874682	11.454	0.279281	Standard	1	0.86	0.97	54507	983	991	100%	81	36	8	2	0.44	0.34	0.55
JY	HLA-C0304	APHGVVFL	0.003127	5.773	0.06892	15.391	23720.1	NB	Raji alleles	FALSE	JY_S	SPIKE_SARS2	P0DTC2	s1056-1063	1056	1063	8	8 to 13 AAs	1	None	APHGVVFL	APHGVVFL	1	2	0.00031263	10.7084	1.08716	Standard	1	0.75	0.85	1330420	1056	1063	100%	6	2	2	0	0.33	0.06	0.71
JY	HLA-C0304	IPTNFTISV	0.014047	2.977	0.242318	2.885	3633.5	NB	Raji alleles	FALSE	JY_S	SPIKE_SARS2	P0DTC2	s0714-0722	714	722	9	8 to 13 AAs	1	None	IPTNFTISV	IPTNFTISV	2	5	0.00616349	8.44266	0.056434	PROSIT		0.8	0.93	1318845	714	722	100%	15	3	3	1	0.2	0.06	0.43
JY	HLA-C0401	SIIAYTMSL	0.025222	1.868	0.145772	1.007	10327.4	WB	Raji alleles	FALSE	JY_S	SPIKE_SARS2	P0DTC2	s0691-0699	691	699	9	8 to 13 AAs	1	None; Oxidation (M)	SIIAYTMSL; SIIAYTM(+15.99)SL	SIIAYTMSL	2	6	0.000228728	9.04343	0.994	Standard	1	0.71	0.8	1309137	691	699	100%	162	74	12	4	0.46	0.38	0.53
JY	HLA-C0401	RLQSLQTYV	0.032671	1.53	0.184222	0.439	6812.66	WB	Raji alleles	FALSE	JY_S	SPIKE_SARS2	P0DTC2	s1000-1008	1000	1008	9	8 to 13 AAs	2	None	RLQSLQTYV	RLQSLQTYV	1	1	0.00747644	#NUM!		Standard	1	0.84	0.96	54725	1000	1008	100%	195	47	11	5	0.24	0.19	0.31
JY	HLA-C0401	RLDKVEAEV	0.1321	0.47	0.164129	0.676	8467.06	SB	Raji alleles	FALSE	JY_S	SPIKE_SARS2	P0DTC2	s0983-0991	983	991	9	8 to 13 AAs	2	None	RLDKVEAEV	RLDKVEAEV	2	4	0.000874682	11.454	0.279281	Standard	1	0.86	0.97	54507	983	991	100%	81	36	8	2	0.44	0.34	0.55
JY	HLA-C0401	APHGVVFL	0.01376	2.904	0.068293	10.336	23881.6	NB	Raji alleles	FALSE	JY_S	SPIKE_SARS2	P0DTC2	s1056-1063	1056	1063	8	8 to 13 AAs	1	None	APHGVVFL	APHGVVFL	1	2	0.00031263	10.7084	1.08716	Standard	1	0.75	0.85	1330420	1056	1063	100%	6	2	2	0	0.33	0.06	0.71
JY	HLA-C0401	IPTNFTISV	0.061728	0.929	0.144041	1.053	10522.7	WB	Raji alleles	FALSE	JY_S	SPIKE_SARS2	P0DTC2	s0714-0722	714	722	9	8 to 13 AAs	1	None	IPTNFTISV	IPTNFTISV	2	5	0.00616349	8.44266	0.056434	PROSIT		0.8	0.93	1318845	714	722	100%	15	3	3	1	0.2	0.06	0.43
JY	HLA-A0301	SIIAYTMSL	0.010084	5.506	0.19613	5.057	5989.09	NB	Raji alleles	FALSE	JY_S	SPIKE_SARS2	P0DTC2	s0691-0699	691	699	9	8 to 13 AAs	1	None; Oxidation (M)	SIIAYTMSL; SIIAYTM(+15.99)SL	SIIAYTMSL	2	6	0.000228728	9.04343	0.994	Standard	1	0.71	0.8	1309137	691	699	100%	162	74	12	4	0.46	0.38	0.53
JY	HLA-A0301	RLQSLQTYV	0.019123	4.23	0.216937	4.331	4781.78	NB	Raji alleles	FALSE	JY_S	SPIKE_SARS2	P0DTC2	s1000-1008	1000	1008	9	8 to 13 AAs	2	None	RLQSLQTYV	RLQSLQTYV	1	1	0.00747644	#NUM!		Standard	1	0.84	0.96	54725	1000	1008	100%	195	47	11	5	0.24	0.19	0.31
JY	HLA-A0301	RLDKVEAEV	0.003105	8.962	0.082375	16.887	20506.5	NB	Raji alleles	FALSE	JY_S	SPIKE_SARS2	P0DTC2	s0983-0991	983	991	9	8 to 13 AAs	2	None	RLDKVEAEV	RLDKVEAEV	2	4	0.000874682	11.454	0.279281	Standard	1	0.86	0.97	54507	983	991	100%	81	36	8	2	0.44	0.34	0.55
JY	HLA-A0301	APHGVVFL	9e-05	35.429	0.024885	66.164	38197.6	NB	Raji alleles	FALSE	JY_S	SPIKE_SARS2	P0DTC2	s1056-1063	1056	1063	8	8 to 13 AAs	1	None	APHGVVFL	APHGVVFL	1	2	0.00031263	10.7084	1.08716	Standard	1	0.75	0.85	1330420	1056	1063	100%	6	2	2	0	0.33	0.06	0.71
JY	HLA-A0301	IPTNFTISV	0.000336	21.359	0.05573	28.521	27358.8	NB	Raji alleles	FALSE	JY_S	SPIKE_SARS2	P0DTC2	s0714-0722	714	722	9	8 to 13 AAs	1	None	IPTNFTISV	IPTNFTISV	2	5	0.00616349	8.44266	0.056434	PROSIT		0.8	0.93	1318845	714	722	100%	15	3	3	1	0.2	0.06	0.43
Raji	HLA-B0702	LYNSASFSTFK	3.2e-05	56.667	0.030395	50.942	35986.9	NB	JY alleles	FALSE	Raji_S	SPIKE_SARS2	P0DTC2	s0368-0378	368	378	11	8 to 13 AAs	1	None	LYNSASFSTFK	LYNSASFSTFK	1	1	0.0215782	5.59702		PROSIT		0.51	0.53
Raji	HLA-B0702	YGVSPTKL	0.002921	9.238	0.058502	23.995	26550.4	NB	JY alleles	FALSE	Raji_S	SPIKE_SARS2	P0DTC2	s0380-0387	380	387	8	8 to 13 AAs	2	None	YGVSPTKL	YGVSPTKL	2	4	0.000348238	8.17302	2.18166	PROSIT		0.67	0.82
Raji	HLA-B0702	VTYVPAQEK	0.000601	18.974	0.038313	40.015	33032.2	NB	JY alleles	FALSE	Raji_S	SPIKE_SARS2	P0DTC2	s1065-1073	1065	1073	9	8 to 13 AAs	2	None	VTYVPAQEK	VTYVPAQEK	2	5	0	12.4685	1.29921	Standard	1	0.94	1	1310928	1065	1073	100%	36	2	2	3	0.06	0.01	0.16
Raji	HLA-B0702	GVYFASTEK	0.000465	21.204	0.053871	26.614	27914.6	NB	JY alleles	FALSE	Raji_S	SPIKE_SARS2	P0DTC2	s0089-0097	89	97	9	8 to 13 AAs	1	None	GVYFASTEK	GVYFASTEK	2	5	0.000291503	9.9047	1.53395	PROSIT		0.79	0.89	1312627	89	97	100%	74	16	7	1	0.22	0.14	0.32
Raji	HLA-B0702	VYDPLQPEL	0.17267	1.006	0.100191	11.428	16911.2	WB	JY alleles	FALSE	Raji_S	SPIKE_SARS2	P0DTC2	s1137-1145	1137	1145	9	8 to 13 AAs	1	None	VYDPLQPEL	VYDPLQPEL	2	6	8.71232e-05	13.669	0.832357	Standard	1	0.94	1	71996	1137	1145	100%	19	1	1	1	0.05	0	0.22
Raji	HLA-B0702	KCYGVSPTKL	0.004219	7.767	0.070359	18.749	23353.7	NB	JY alleles	FALSE	Raji_S	SPIKE_SARS2	P0DTC2	s0378-0387	378	387	10	8 to 13 AAs	2	None; Cysteinylation; Acetylation (N-term); Cysteinylation	KCYGVSPTKL; KC(+119.00)YGVSPTKL; K(+42.01)C(+119.00)YGVSPTKL	KCYGVSPTKL	2	6	0	10.706	2.16313	NP				1630363	378	387	100%	5	0	0	1	0	0	0.43
Raji	HLA-B0702	TYVPAQEK	5.7e-05	47.5	0.015292	82.845	42375.4	NB	JY alleles	FALSE	Raji_S	SPIKE_SARS2	P0DTC2	s1066-1073	1066	1073	8	8 to 13 AAs	1	None	TYVPAQEK	TYVPAQEK	1	1	0.000151492	9.31841		Standard	1	0.95	1
Raji	HLA-B0702	PLQPELDSF	0.000422	22.095	0.029439	52.572	36361.1	NB	JY alleles	FALSE	Raji_S	SPIKE_SARS2	P0DTC2	s1140-1148	1140	1148	9	8 to 13 AAs	1	None	PLQPELDSF	PLQPELDSF	1	2	0.00760985	7.58353		PROSIT		0.71	0.86
Raji	HLA-B0702	RVYSTGSNVFQTR	0.000232	28.25	0.060936	22.753	25860.3	NB	JY alleles	FALSE	Raji_S	SPIKE_SARS2	P0DTC2	s0634-0646	634	646	13	8 to 13 AAs	3	None	RVYSTGSNVFQTR	RVYSTGSNVFQTR	2	6	0	13.6759	3.13108	PROSIT		0.84	0.95
Raji	HLA-B0702	SIIAYTMSL	0.112016	1.355	0.394094	1.011	703.29	WB	JY alleles	FALSE	Raji_S	SPIKE_SARS2	P0DTC2	s0691-0699	691	699	9	8 to 13 AAs	1	None; Oxidation (M)	SIIAYTMSL; SIIAYTM(+15.99)SL	SIIAYTMSL	2	6	0	11.6613	1.73362	Standard	1	0.89	0.97	1309137	691	699	100%	162	74	12	4	0.46	0.38	0.53
Raji	HLA-B0702	SASFSTFK	6.4e-05	45.75	0.033369	46.337	34847.4	NB	JY alleles	FALSE	Raji_S	SPIKE_SARS2	P0DTC2	s0371-0378	371	378	8	8 to 13 AAs	1	None	SASFSTFK	SASFSTFK	2	2	0.00165581	10.7441	2.00901	PROSIT		0.83	0.93
Raji	HLA-B0702	AIHVSGTNGTK	0.000112	37.375	0.029992	51.629	36144.2	NB	JY alleles	FALSE	Raji_S	SPIKE_SARS2	P0DTC2	s0067-0077	67	77	11	8 to 13 AAs	2	None	AIHVSGTNGTK	AIHVSGTNGTK	2	5	0	8.78582	1.93964	PROSIT		0.4	0.47
Raji	HLA-B0702	GVLTESNKK	9.3e-05	40	0.017084	78.365	41561.7	NB	JY alleles	FALSE	Raji_S	SPIKE_SARS2	P0DTC2	s0550-0558	550	558	9	8 to 13 AAs	2	None	GVLTESNKK	GVLTESNKK	1	1	0.015959	7.25541		PROSIT		0.81	0.94	1547617	550	558	100%	11	0	0	2	0	0	0.23
Raji	HLA-B0702	VLYNSASFSTFK	1.2e-05	72.5	0.033484	46.168	34804.1	NB	JY alleles	FALSE	Raji_S	SPIKE_SARS2	P0DTC2	s0367-0378	367	378	12	8 to 13 AAs	2	None	VLYNSASFSTFK	VLYNSASFSTFK	2	5	0	14.5088	1.1654	PROSIT		0.81	0.94	1526436	367	378	100%	2	2	2	0	1	0.22	1
Raji	HLA-B0702	PLQPELDSFK	6e-06	81.667	0.013737	86.657	43094.3	NB	JY alleles	FALSE	Raji_S	SPIKE_SARS2	P0DTC2	s1140-1149	1140	1149	10	8 to 13 AAs	2	None	PLQPELDSFK	PLQPELDSFK	2	4	0	8.865	0.209326	PROSIT		0.71	0.88
Raji	HLA-B0702	NSASFSTFK	0.000144	34	0.043689	34.371	31165.7	NB	JY alleles	FALSE	Raji_S	SPIKE_SARS2	P0DTC2	s0370-0378	370	378	9	8 to 13 AAs	1	None	NSASFSTFK	NSASFSTFK	2	2	8.71232e-05	10.608	2.23818	PROSIT		0.76	0.86	1313244	370	378	100%	23	3	3	2	0.13	0.03	0.3
Raji	HLA-B0702	NRALTGIAV	0.001691	11.909	0.100454	11.383	16863.2	NB	JY alleles	FALSE	Raji_S	SPIKE_SARS2	P0DTC2	s0764-0772	764	772	9	8 to 13 AAs	2	None	NRALTGIAV	NRALTGIAV	2	4	0.00195262	10.6192	1.00314	Standard	1	0.93	0.99
Raji	HLA-B0702	TLKSFTVEK	0.000701	17.716	0.049711	29.4	29199.8	NB	JY alleles	FALSE	Raji_S	SPIKE_SARS2	P0DTC2	s0302-0310	302	310	9	8 to 13 AAs	2	None	TLKSFTVEK	TLKSFTVEK	1	3	0	6.5803	0.75057	PROSIT		0.71	0.87	1313756	302	310	100%	21	1	1	2	0.05	0	0.2
Raji	HLA-B0702	RQIAPGQTGK	0.000996	15.104	0.056283	25.197	27195.5	NB	JY alleles	FALSE	Raji_S	SPIKE_SARS2	P0DTC2	s0408-0417	408	417	10	8 to 13 AAs	2	None	RQIAPGQTGK	RQIAPGQTGK	2	6	0	8.9873	1.34055	PROSIT		0.63	0.76	1330580	408	417	100%	10	0	0	1	0	0	0.25
Raji	HLA-C0702	LYNSASFSTFK	0.000838	10.63	0.142826	5.643	10661.9	NB	JY alleles	FALSE	Raji_S	SPIKE_SARS2	P0DTC2	s0368-0378	368	378	11	8 to 13 AAs	1	None	LYNSASFSTFK	LYNSASFSTFK	1	1	0.0215782	5.59702		PROSIT		0.51	0.53
Raji	HLA-C0702	YGVSPTKL	0.00194	7.118	0.077387	16.26	21643.7	NB	JY alleles	FALSE	Raji_S	SPIKE_SARS2	P0DTC2	s0380-0387	380	387	8	8 to 13 AAs	2	None	YGVSPTKL	YGVSPTKL	2	4	0.000348238	8.17302	2.18166	PROSIT		0.67	0.82
Raji	HLA-C0702	VTYVPAQEK	0.006977	3.665	0.094406	11.881	18003.6	NB	JY alleles	FALSE	Raji_S	SPIKE_SARS2	P0DTC2	s1065-1073	1065	1073	9	8 to 13 AAs	2	None	VTYVPAQEK	VTYVPAQEK	2	5	0	12.4685	1.29921	Standard	1	0.94	1	1310928	1065	1073	100%	36	2	2	3	0.06	0.01	0.16
Raji	HLA-C0702	GVYFASTEK	0.001413	8.282	0.072086	18.021	22921.3	NB	JY alleles	FALSE	Raji_S	SPIKE_SARS2	P0DTC2	s0089-0097	89	97	9	8 to 13 AAs	1	None	GVYFASTEK	GVYFASTEK	2	5	0.000291503	9.9047	1.53395	PROSIT		0.79	0.89	1312627	89	97	100%	74	16	7	1	0.22	0.14	0.32
Raji	HLA-C0702	VYDPLQPEL	0.871354	0.006	0.475003	0.152	293.05	SB	JY alleles	FALSE	Raji_S	SPIKE_SARS2	P0DTC2	s1137-1145	1137	1145	9	8 to 13 AAs	1	None	VYDPLQPEL	VYDPLQPEL	2	6	8.71232e-05	13.669	0.832357	Standard	1	0.94	1	71996	1137	1145	100%	19	1	1	1	0.05	0	0.22
Raji	HLA-C0702	KCYGVSPTKL	0.001276	8.687	0.075306	16.928	22136.5	NB	JY alleles	FALSE	Raji_S	SPIKE_SARS2	P0DTC2	s0378-0387	378	387	10	8 to 13 AAs	2	None; Cysteinylation; Acetylation (N-term); Cysteinylation	KCYGVSPTKL; KC(+119.00)YGVSPTKL; K(+42.01)C(+119.00)YGVSPTKL	KCYGVSPTKL	2	6	0	10.706	2.16313	NP				1630363	378	387	100%	5	0	0	1	0	0	0.43
Raji	HLA-C0702	TYVPAQEK	0.000903	10.271	0.066622	20.167	24317.3	NB	JY alleles	FALSE	Raji_S	SPIKE_SARS2	P0DTC2	s1066-1073	1066	1073	8	8 to 13 AAs	1	None	TYVPAQEK	TYVPAQEK	1	1	0.000151492	9.31841		Standard	1	0.95	1
Raji	HLA-C0702	PLQPELDSF	0.00035	15.564	0.046693	31.628	30169	NB	JY alleles	FALSE	Raji_S	SPIKE_SARS2	P0DTC2	s1140-1148	1140	1148	9	8 to 13 AAs	1	None	PLQPELDSF	PLQPELDSF	1	2	0.00760985	7.58353		PROSIT		0.71	0.86
Raji	HLA-C0702	RVYSTGSNVFQTR	4e-05	34.667	0.053883	26.666	27911	NB	JY alleles	FALSE	Raji_S	SPIKE_SARS2	P0DTC2	s0634-0646	634	646	13	8 to 13 AAs	3	None	RVYSTGSNVFQTR	RVYSTGSNVFQTR	2	6	0	13.6759	3.13108	PROSIT		0.84	0.95
Raji	HLA-C0702	SIIAYTMSL	0.035421	1.279	0.354507	0.495	1079.33	WB	JY alleles	FALSE	Raji_S	SPIKE_SARS2	P0DTC2	s0691-0699	691	699	9	8 to 13 AAs	1	None; Oxidation (M)	SIIAYTMSL; SIIAYTM(+15.99)SL	SIIAYTMSL	2	6	0	11.6613	1.73362	Standard	1	0.89	0.97	1309137	691	699	100%	162	74	12	4	0.46	0.38	0.53
Raji	HLA-C0702	SASFSTFK	4.4e-05	33.5	0.044904	33.053	30758.7	NB	JY alleles	FALSE	Raji_S	SPIKE_SARS2	P0DTC2	s0371-0378	371	378	8	8 to 13 AAs	1	None	SASFSTFK	SASFSTFK	2	2	0.00165581	10.7441	2.00901	PROSIT		0.83	0.93
Raji	HLA-C0702	AIHVSGTNGTK	9e-06	53.333	0.022134	62.477	39351.7	NB	JY alleles	FALSE	Raji_S	SPIKE_SARS2	P0DTC2	s0067-0077	67	77	11	8 to 13 AAs	2	None	AIHVSGTNGTK	AIHVSGTNGTK	2	5	0	8.78582	1.93964	PROSIT		0.4	0.47
Raji	HLA-C0702	GVLTESNKK	3.6e-05	35.75	0.018314	70.333	41012.2	NB	JY alleles	FALSE	Raji_S	SPIKE_SARS2	P0DTC2	s0550-0558	550	558	9	8 to 13 AAs	2	None	GVLTESNKK	GVLTESNKK	1	1	0.015959	7.25541		PROSIT		0.81	0.94	1547617	550	558	100%	11	0	0	2	0	0	0.23
Raji	HLA-C0702	VLYNSASFSTFK	1.4e-05	47	0.066449	20.243	24362.9	NB	JY alleles	FALSE	Raji_S	SPIKE_SARS2	P0DTC2	s0367-0378	367	378	12	8 to 13 AAs	2	None	VLYNSASFSTFK	VLYNSASFSTFK	2	5	0	14.5088	1.1654	PROSIT		0.81	0.94	1526436	367	378	100%	2	2	2	0	1	0.22	1
Raji	HLA-C0702	PLQPELDSFK	3e-06	70	0.021995	62.743	39410.9	NB	JY alleles	FALSE	Raji_S	SPIKE_SARS2	P0DTC2	s1140-1149	1140	1149	10	8 to 13 AAs	2	None	PLQPELDSFK	PLQPELDSFK	2	4	0	8.865	0.209326	PROSIT		0.71	0.88
Raji	HLA-C0702	NSASFSTFK	0.001209	8.915	0.117544	8.129	14016.3	NB	JY alleles	FALSE	Raji_S	SPIKE_SARS2	P0DTC2	s0370-0378	370	378	9	8 to 13 AAs	1	None	NSASFSTFK	NSASFSTFK	2	2	8.71232e-05	10.608	2.23818	PROSIT		0.76	0.86	1313244	370	378	100%	23	3	3	2	0.13	0.03	0.3
Raji	HLA-C0702	NRALTGIAV	0.026402	1.583	0.294403	0.926	2068.14	WB	JY alleles	FALSE	Raji_S	SPIKE_SARS2	P0DTC2	s0764-0772	764	772	9	8 to 13 AAs	2	None	NRALTGIAV	NRALTGIAV	2	4	0.00195262	10.6192	1.00314	Standard	1	0.93	0.99
Raji	HLA-C0702	TLKSFTVEK	0.003338	5.424	0.117067	8.186	14088.9	NB	JY alleles	FALSE	Raji_S	SPIKE_SARS2	P0DTC2	s0302-0310	302	310	9	8 to 13 AAs	2	None	TLKSFTVEK	TLKSFTVEK	1	3	0	6.5803	0.75057	PROSIT		0.71	0.87	1313756	302	310	100%	21	1	1	2	0.05	0	0.2
Raji	HLA-C0702	RQIAPGQTGK	0.001499	8.053	0.052804	27.33	28238.8	NB	JY alleles	FALSE	Raji_S	SPIKE_SARS2	P0DTC2	s0408-0417	408	417	10	8 to 13 AAs	2	None	RQIAPGQTGK	RQIAPGQTGK	2	6	0	8.9873	1.34055	PROSIT		0.63	0.76	1330580	408	417	100%	10	0	0	1	0	0	0.25
Raji	HLA-A0201	LYNSASFSTFK	2.8e-05	59.545	0.039376	49.389	32654.5	NB	JY alleles	FALSE	Raji_S	SPIKE_SARS2	P0DTC2	s0368-0378	368	378	11	8 to 13 AAs	1	None	LYNSASFSTFK	LYNSASFSTFK	1	1	0.0215782	5.59702		PROSIT		0.51	0.53
Raji	HLA-A0201	YGVSPTKL	0.000548	22.554	0.027864	61.995	36986.1	NB	JY alleles	FALSE	Raji_S	SPIKE_SARS2	P0DTC2	s0380-0387	380	387	8	8 to 13 AAs	2	None	YGVSPTKL	YGVSPTKL	2	4	0.000348238	8.17302	2.18166	PROSIT		0.67	0.82
Raji	HLA-A0201	VTYVPAQEK	0.000891	18.669	0.045829	44.041	30452.4	NB	JY alleles	FALSE	Raji_S	SPIKE_SARS2	P0DTC2	s1065-1073	1065	1073	9	8 to 13 AAs	2	None	VTYVPAQEK	VTYVPAQEK	2	5	0	12.4685	1.29921	Standard	1	0.94	1	1310928	1065	1073	100%	36	2	2	3	0.06	0.01	0.16
Raji	HLA-A0201	GVYFASTEK	0.001133	16.98	0.073893	29.629	22477.5	NB	JY alleles	FALSE	Raji_S	SPIKE_SARS2	P0DTC2	s0089-0097	89	97	9	8 to 13 AAs	1	None	GVYFASTEK	GVYFASTEK	2	5	0.000291503	9.9047	1.53395	PROSIT		0.79	0.89	1312627	89	97	100%	74	16	7	1	0.22	0.14	0.32
Raji	HLA-A0201	VYDPLQPEL	0.196623	1.157	0.162244	13.35	8641.52	WB	JY alleles	FALSE	Raji_S	SPIKE_SARS2	P0DTC2	s1137-1145	1137	1145	9	8 to 13 AAs	1	None	VYDPLQPEL	VYDPLQPEL	2	6	8.71232e-05	13.669	0.832357	Standard	1	0.94	1	71996	1137	1145	100%	19	1	1	1	0.05	0	0.22
Raji	HLA-A0201	KCYGVSPTKL	0.015333	5.467	0.150658	14.518	9795.63	NB	JY alleles	FALSE	Raji_S	SPIKE_SARS2	P0DTC2	s0378-0387	378	387	10	8 to 13 AAs	2	None; Cysteinylation; Acetylation (N-term); Cysteinylation	KCYGVSPTKL; KC(+119.00)YGVSPTKL; K(+42.01)C(+119.00)YGVSPTKL	KCYGVSPTKL	2	6	0	10.706	2.16313	NP				1630363	378	387	100%	5	0	0	1	0	0	0.43
Raji	HLA-A0201	TYVPAQEK	6.1e-05	48.2	0.017198	78.336	41510.4	NB	JY alleles	FALSE	Raji_S	SPIKE_SARS2	P0DTC2	s1066-1073	1066	1073	8	8 to 13 AAs	1	None	TYVPAQEK	TYVPAQEK	1	1	0.000151492	9.31841		Standard	1	0.95	1
Raji	HLA-A0201	PLQPELDSF	0.00237	12.675	0.058595	36.103	26523.7	NB	JY alleles	FALSE	Raji_S	SPIKE_SARS2	P0DTC2	s1140-1148	1140	1148	9	8 to 13 AAs	1	None	PLQPELDSF	PLQPELDSF	1	2	0.00760985	7.58353		PROSIT		0.71	0.86
Raji	HLA-A0201	RVYSTGSNVFQTR	0.000311	27.839	0.074558	29.393	22316.4	NB	JY alleles	FALSE	Raji_S	SPIKE_SARS2	P0DTC2	s0634-0646	634	646	13	8 to 13 AAs	3	None	RVYSTGSNVFQTR	RVYSTGSNVFQTR	2	6	0	13.6759	3.13108	PROSIT		0.84	0.95
Raji	HLA-A0201	SIIAYTMSL	0.580032	0.3	0.721492	0.294	20.36	SB	JY alleles	FALSE	Raji_S	SPIKE_SARS2	P0DTC2	s0691-0699	691	699	9	8 to 13 AAs	1	None; Oxidation (M)	SIIAYTMSL; SIIAYTM(+15.99)SL	SIIAYTMSL	2	6	0	11.6613	1.73362	Standard	1	0.89	0.97	1309137	691	699	100%	162	74	12	4	0.46	0.38	0.53
Raji	HLA-A0201	SASFSTFK	3e-05	58.636	0.029583	59.771	36304.5	NB	JY alleles	FALSE	Raji_S	SPIKE_SARS2	P0DTC2	s0371-0378	371	378	8	8 to 13 AAs	1	None	SASFSTFK	SASFSTFK	2	2	0.00165581	10.7441	2.00901	PROSIT		0.83	0.93
Raji	HLA-A0201	AIHVSGTNGTK	0.000118	39.111	0.025453	65.172	37963.6	NB	JY alleles	FALSE	Raji_S	SPIKE_SARS2	P0DTC2	s0067-0077	67	77	11	8 to 13 AAs	2	None	AIHVSGTNGTK	AIHVSGTNGTK	2	5	0	8.78582	1.93964	PROSIT		0.4	0.47
Raji	HLA-A0201	GVLTESNKK	0.000252	30.091	0.025086	65.718	38114.6	NB	JY alleles	FALSE	Raji_S	SPIKE_SARS2	P0DTC2	s0550-0558	550	558	9	8 to 13 AAs	2	None	GVLTESNKK	GVLTESNKK	1	1	0.015959	7.25541		PROSIT		0.81	0.94	1547617	550	558	100%	11	0	0	2	0	0	0.23
Raji	HLA-A0201	VLYNSASFSTFK	0.000284	28.815	0.144264	15.217	10497.3	NB	JY alleles	FALSE	Raji_S	SPIKE_SARS2	P0DTC2	s0367-0378	367	378	12	8 to 13 AAs	2	None	VLYNSASFSTFK	VLYNSASFSTFK	2	5	0	14.5088	1.1654	PROSIT		0.81	0.94	1526436	367	378	100%	2	2	2	0	1	0.22	1
Raji	HLA-A0201	PLQPELDSFK	0.000178	34	0.043533	45.81	31218.3	NB	JY alleles	FALSE	Raji_S	SPIKE_SARS2	P0DTC2	s1140-1149	1140	1149	10	8 to 13 AAs	2	None	PLQPELDSFK	PLQPELDSFK	2	4	0	8.865	0.209326	PROSIT		0.71	0.88
Raji	HLA-A0201	NSASFSTFK	0.000142	36.75	0.059572	35.615	26244.8	NB	JY alleles	FALSE	Raji_S	SPIKE_SARS2	P0DTC2	s0370-0378	370	378	9	8 to 13 AAs	1	None	NSASFSTFK	NSASFSTFK	2	2	8.71232e-05	10.608	2.23818	PROSIT		0.76	0.86	1313244	370	378	100%	23	3	3	2	0.13	0.03	0.3
Raji	HLA-A0201	NRALTGIAV	0.000198	32.778	0.054927	38.107	27597.5	NB	JY alleles	FALSE	Raji_S	SPIKE_SARS2	P0DTC2	s0764-0772	764	772	9	8 to 13 AAs	2	None	NRALTGIAV	NRALTGIAV	2	4	0.00195262	10.6192	1.00314	Standard	1	0.93	0.99
Raji	HLA-A0201	TLKSFTVEK	0.00696	7.951	0.096806	22.957	17542.1	NB	JY alleles	FALSE	Raji_S	SPIKE_SARS2	P0DTC2	s0302-0310	302	310	9	8 to 13 AAs	2	None	TLKSFTVEK	TLKSFTVEK	1	3	0	6.5803	0.75057	PROSIT		0.71	0.87	1313756	302	310	100%	21	1	1	2	0.05	0	0.2
Raji	HLA-A0201	RQIAPGQTGK	0.002282	12.865	0.066911	32.322	24241.4	NB	JY alleles	FALSE	Raji_S	SPIKE_SARS2	P0DTC2	s0408-0417	408	417	10	8 to 13 AAs	2	None	RQIAPGQTGK	RQIAPGQTGK	2	6	0	8.9873	1.34055	PROSIT		0.63	0.76	1330580	408	417	100%	10	0	0	1	0	0	0.25

## Sheet: ms_mhcpred_merged_minrank
Cell.Line	Allele	Sequence	EL_score	EL_Rank	Aff_Score	Aff_Rank	Aff_nM	Binder	Cell.Line_allele	MatchedAllele	Condition	GeneOrganism	ProteinFirst	Seq.ID	start	end	Length	Length_range	Charge	PTM	Peptides.Modified	Peptides	n_BioReplicate	n_TechReplicate	ms2r_q_value_pep	Log2Area_mean	Log2Area_sd	ValidationType	Ratio_iRT	SA	PCC	iedb_Epitope.ID	iedb_Mapped.Start.Position	iedb_Mapped.End.Position	iedb_Identity	iedb_Subjects.Tested	iedb_Subjects.Responded	iedb_Assays.Positive	iedb_Assays.Negative	iedb_Response.Freq.	iedb_Lower.Bound.of.95..CI	iedb_Upper.Bound.of.95..CI
JY	HLA-B0702	APHGVVFL	0.572123	0.311	0.408214	0.928	603.65	SB	JY alleles	TRUE	JY_S	SPIKE_SARS2	P0DTC2	s1056-1063	1056	1063	8	8 to 13 AAs	1	None	APHGVVFL	APHGVVFL	1	2	0.00031263	10.7084	1.08716	Standard	1	0.75	0.85	1330420	1056	1063	100%	6	2	2	0	0.33	0.06	0.71
JY	HLA-B0702	IPTNFTISV	0.472945	0.418	0.516024	0.472	188.01	SB	JY alleles	TRUE	JY_S	SPIKE_SARS2	P0DTC2	s0714-0722	714	722	9	8 to 13 AAs	1	None	IPTNFTISV	IPTNFTISV	2	5	0.00616349	8.44266	0.056434	PROSIT		0.8	0.93	1318845	714	722	100%	15	3	3	1	0.2	0.06	0.43
JY	HLA-A0201	SIIAYTMSL	0.580032	0.3	0.721492	0.294	20.36	SB	JY alleles	TRUE	JY_S	SPIKE_SARS2	P0DTC2	s0691-0699	691	699	9	8 to 13 AAs	1	None; Oxidation (M)	SIIAYTMSL; SIIAYTM(+15.99)SL	SIIAYTMSL	2	6	0.000228728	9.04343	0.994	Standard	1	0.71	0.8	1309137	691	699	100%	162	74	12	4	0.46	0.38	0.53
JY	HLA-A0201	RLQSLQTYV	0.87376	0.062	0.770923	0.161	11.92	SB	JY alleles	TRUE	JY_S	SPIKE_SARS2	P0DTC2	s1000-1008	1000	1008	9	8 to 13 AAs	2	None	RLQSLQTYV	RLQSLQTYV	1	1	0.00747644	#NUM!		Standard	1	0.84	0.96	54725	1000	1008	100%	195	47	11	5	0.24	0.19	0.31
JY	HLA-A0201	RLDKVEAEV	0.825045	0.09	0.644689	0.618	46.73	SB	JY alleles	TRUE	JY_S	SPIKE_SARS2	P0DTC2	s0983-0991	983	991	9	8 to 13 AAs	2	None	RLDKVEAEV	RLDKVEAEV	2	4	0.000874682	11.454	0.279281	Standard	1	0.86	0.97	54507	983	991	100%	81	36	8	2	0.44	0.34	0.55
Raji	HLA-B1510	NRALTGIAV	0.246111	0.203	0.26241	0.182	2923.57	SB	Raji alleles	TRUE	Raji_S	SPIKE_SARS2	P0DTC2	s0764-0772	764	772	9	8 to 13 AAs	2	None	NRALTGIAV	NRALTGIAV	2	4	0.00195262	10.6192	1.00314	Standard	1	0.93	0.99
Raji	HLA-C0304	YGVSPTKL	0.114769	0.87	0.222762	3.337	4489.71	WB	Raji alleles	TRUE	Raji_S	SPIKE_SARS2	P0DTC2	s0380-0387	380	387	8	8 to 13 AAs	2	None	YGVSPTKL	YGVSPTKL	2	4	0.000348238	8.17302	2.18166	PROSIT		0.67	0.82
Raji	HLA-C0304	SIIAYTMSL	0.431135	0.268	0.704794	0.111	24.39	SB	Raji alleles	TRUE	Raji_S	SPIKE_SARS2	P0DTC2	s0691-0699	691	699	9	8 to 13 AAs	1	None; Oxidation (M)	SIIAYTMSL; SIIAYTM(+15.99)SL	SIIAYTMSL	2	6	0	11.6613	1.73362	Standard	1	0.89	0.97	1309137	691	699	100%	162	74	12	4	0.46	0.38	0.53
Raji	HLA-C0401	VYDPLQPEL	0.98901	0.001	0.51678	0.009	186.48	SB	Raji alleles	TRUE	Raji_S	SPIKE_SARS2	P0DTC2	s1137-1145	1137	1145	9	8 to 13 AAs	1	None	VYDPLQPEL	VYDPLQPEL	2	6	8.71232e-05	13.669	0.832357	Standard	1	0.94	1	71996	1137	1145	100%	19	1	1	1	0.05	0	0.22
Raji	HLA-C0401	PLQPELDSF	0.004988	5.637	0.045971	23.793	30405.6	NB	Raji alleles	TRUE	Raji_S	SPIKE_SARS2	P0DTC2	s1140-1148	1140	1148	9	8 to 13 AAs	1	None	PLQPELDSF	PLQPELDSF	1	2	0.00760985	7.58353		PROSIT		0.71	0.86
Raji	HLA-A0301	LYNSASFSTFK	0.075458	2.272	0.474145	0.831	295.79	NB	Raji alleles	TRUE	Raji_S	SPIKE_SARS2	P0DTC2	s0368-0378	368	378	11	8 to 13 AAs	1	None	LYNSASFSTFK	LYNSASFSTFK	1	1	0.0215782	5.59702		PROSIT		0.51	0.53
Raji	HLA-A0301	VTYVPAQEK	0.932408	0.027	0.660915	0.154	39.21	SB	Raji alleles	TRUE	Raji_S	SPIKE_SARS2	P0DTC2	s1065-1073	1065	1073	9	8 to 13 AAs	2	None	VTYVPAQEK	VTYVPAQEK	2	5	0	12.4685	1.29921	Standard	1	0.94	1	1310928	1065	1073	100%	36	2	2	3	0.06	0.01	0.16
Raji	HLA-A0301	GVYFASTEK	0.918399	0.034	0.727116	0.054	19.15	SB	Raji alleles	TRUE	Raji_S	SPIKE_SARS2	P0DTC2	s0089-0097	89	97	9	8 to 13 AAs	1	None	GVYFASTEK	GVYFASTEK	2	5	0.000291503	9.9047	1.53395	PROSIT		0.79	0.89	1312627	89	97	100%	74	16	7	1	0.22	0.14	0.32
Raji	HLA-A0301	KCYGVSPTKL	0.018071	4.331	0.142155	7.898	10739.6	NB	Raji alleles	TRUE	Raji_S	SPIKE_SARS2	P0DTC2	s0378-0387	378	387	10	8 to 13 AAs	2	None; Cysteinylation; Acetylation (N-term); Cysteinylation	KCYGVSPTKL; KC(+119.00)YGVSPTKL; K(+42.01)C(+119.00)YGVSPTKL	KCYGVSPTKL	2	6	0	10.706	2.16313	NP				1630363	378	387	100%	5	0	0	1	0	0	0.43
Raji	HLA-A0301	TYVPAQEK	0.016067	4.533	0.14793	7.459	10089.1	NB	Raji alleles	TRUE	Raji_S	SPIKE_SARS2	P0DTC2	s1066-1073	1066	1073	8	8 to 13 AAs	1	None	TYVPAQEK	TYVPAQEK	1	1	0.000151492	9.31841		Standard	1	0.95	1
Raji	HLA-A0301	RVYSTGSNVFQTR	0.398774	0.638	0.467928	0.873	316.37	WB	Raji alleles	TRUE	Raji_S	SPIKE_SARS2	P0DTC2	s0634-0646	634	646	13	8 to 13 AAs	3	None	RVYSTGSNVFQTR	RVYSTGSNVFQTR	2	6	0	13.6759	3.13108	PROSIT		0.84	0.95
Raji	HLA-A0301	SASFSTFK	0.012321	5.07	0.254399	3.396	3188.28	NB	Raji alleles	TRUE	Raji_S	SPIKE_SARS2	P0DTC2	s0371-0378	371	378	8	8 to 13 AAs	1	None	SASFSTFK	SASFSTFK	2	2	0.00165581	10.7441	2.00901	PROSIT		0.83	0.93
Raji	HLA-A0301	AIHVSGTNGTK	0.414262	0.607	0.419495	1.214	534.29	WB	Raji alleles	TRUE	Raji_S	SPIKE_SARS2	P0DTC2	s0067-0077	67	77	11	8 to 13 AAs	2	None	AIHVSGTNGTK	AIHVSGTNGTK	2	5	0	8.78582	1.93964	PROSIT		0.4	0.47
Raji	HLA-A0301	GVLTESNKK	0.452652	0.536	0.393382	1.43	708.73	WB	Raji alleles	TRUE	Raji_S	SPIKE_SARS2	P0DTC2	s0550-0558	550	558	9	8 to 13 AAs	2	None	GVLTESNKK	GVLTESNKK	1	1	0.015959	7.25541		PROSIT		0.81	0.94	1547617	550	558	100%	11	0	0	2	0	0	0.23
Raji	HLA-A0301	VLYNSASFSTFK	0.764316	0.152	0.813392	0.011	7.53	SB	Raji alleles	TRUE	Raji_S	SPIKE_SARS2	P0DTC2	s0367-0378	367	378	12	8 to 13 AAs	2	None	VLYNSASFSTFK	VLYNSASFSTFK	2	5	0	14.5088	1.1654	PROSIT		0.81	0.94	1526436	367	378	100%	2	2	2	0	1	0.22	1
Raji	HLA-A0301	PLQPELDSFK	0.028345	3.562	0.250071	3.483	3341.13	NB	Raji alleles	TRUE	Raji_S	SPIKE_SARS2	P0DTC2	s1140-1149	1140	1149	10	8 to 13 AAs	2	None	PLQPELDSFK	PLQPELDSFK	2	4	0	8.865	0.209326	PROSIT		0.71	0.88
Raji	HLA-A0301	NSASFSTFK	0.348642	0.742	0.562754	0.418	113.4	WB	Raji alleles	TRUE	Raji_S	SPIKE_SARS2	P0DTC2	s0370-0378	370	378	9	8 to 13 AAs	1	None	NSASFSTFK	NSASFSTFK	2	2	8.71232e-05	10.608	2.23818	PROSIT		0.76	0.86	1313244	370	378	100%	23	3	3	2	0.13	0.03	0.3
Raji	HLA-A0301	TLKSFTVEK	0.926974	0.03	0.705758	0.078	24.13	SB	Raji alleles	TRUE	Raji_S	SPIKE_SARS2	P0DTC2	s0302-0310	302	310	9	8 to 13 AAs	2	None	TLKSFTVEK	TLKSFTVEK	1	3	0	6.5803	0.75057	PROSIT		0.71	0.87	1313756	302	310	100%	21	1	1	2	0.05	0	0.2
Raji	HLA-A0301	RQIAPGQTGK	0.904489	0.04	0.639078	0.198	49.65	SB	Raji alleles	TRUE	Raji_S	SPIKE_SARS2	P0DTC2	s0408-0417	408	417	10	8 to 13 AAs	2	None	RQIAPGQTGK	RQIAPGQTGK	2	6	0	8.9873	1.34055	PROSIT		0.63	0.76	1330580	408	417	100%	10	0	0	1	0	0	0.25
JY	HLA-C0304	SIIAYTMSL	0.431135	0.268	0.704794	0.111	24.39	SB	Raji alleles	FALSE	JY_S	SPIKE_SARS2	P0DTC2	s0691-0699	691	699	9	8 to 13 AAs	1	None; Oxidation (M)	SIIAYTMSL; SIIAYTM(+15.99)SL	SIIAYTMSL	2	6	0.000228728	9.04343	0.994	Standard	1	0.71	0.8	1309137	691	699	100%	162	74	12	4	0.46	0.38	0.53
JY	HLA-C0401	RLQSLQTYV	0.032671	1.53	0.184222	0.439	6812.66	WB	Raji alleles	FALSE	JY_S	SPIKE_SARS2	P0DTC2	s1000-1008	1000	1008	9	8 to 13 AAs	2	None	RLQSLQTYV	RLQSLQTYV	1	1	0.00747644	#NUM!		Standard	1	0.84	0.96	54725	1000	1008	100%	195	47	11	5	0.24	0.19	0.31
JY	HLA-C0401	RLDKVEAEV	0.1321	0.47	0.164129	0.676	8467.06	SB	Raji alleles	FALSE	JY_S	SPIKE_SARS2	P0DTC2	s0983-0991	983	991	9	8 to 13 AAs	2	None	RLDKVEAEV	RLDKVEAEV	2	4	0.000874682	11.454	0.279281	Standard	1	0.86	0.97	54507	983	991	100%	81	36	8	2	0.44	0.34	0.55
JY	HLA-C0401	APHGVVFL	0.01376	2.904	0.068293	10.336	23881.6	NB	Raji alleles	FALSE	JY_S	SPIKE_SARS2	P0DTC2	s1056-1063	1056	1063	8	8 to 13 AAs	1	None	APHGVVFL	APHGVVFL	1	2	0.00031263	10.7084	1.08716	Standard	1	0.75	0.85	1330420	1056	1063	100%	6	2	2	0	0.33	0.06	0.71
JY	HLA-C0401	IPTNFTISV	0.061728	0.929	0.144041	1.053	10522.7	WB	Raji alleles	FALSE	JY_S	SPIKE_SARS2	P0DTC2	s0714-0722	714	722	9	8 to 13 AAs	1	None	IPTNFTISV	IPTNFTISV	2	5	0.00616349	8.44266	0.056434	PROSIT		0.8	0.93	1318845	714	722	100%	15	3	3	1	0.2	0.06	0.43
Raji	HLA-B0702	AIHVSGTNGTK	0.000112	37.375	0.029992	51.629	36144.2	NB	JY alleles	FALSE	Raji_S	SPIKE_SARS2	P0DTC2	s0067-0077	67	77	11	8 to 13 AAs	2	None	AIHVSGTNGTK	AIHVSGTNGTK	2	5	0	8.78582	1.93964	PROSIT		0.4	0.47
Raji	HLA-C0702	LYNSASFSTFK	0.000838	10.63	0.142826	5.643	10661.9	NB	JY alleles	FALSE	Raji_S	SPIKE_SARS2	P0DTC2	s0368-0378	368	378	11	8 to 13 AAs	1	None	LYNSASFSTFK	LYNSASFSTFK	1	1	0.0215782	5.59702		PROSIT		0.51	0.53
Raji	HLA-C0702	YGVSPTKL	0.00194	7.118	0.077387	16.26	21643.7	NB	JY alleles	FALSE	Raji_S	SPIKE_SARS2	P0DTC2	s0380-0387	380	387	8	8 to 13 AAs	2	None	YGVSPTKL	YGVSPTKL	2	4	0.000348238	8.17302	2.18166	PROSIT		0.67	0.82
Raji	HLA-C0702	VTYVPAQEK	0.006977	3.665	0.094406	11.881	18003.6	NB	JY alleles	FALSE	Raji_S	SPIKE_SARS2	P0DTC2	s1065-1073	1065	1073	9	8 to 13 AAs	2	None	VTYVPAQEK	VTYVPAQEK	2	5	0	12.4685	1.29921	Standard	1	0.94	1	1310928	1065	1073	100%	36	2	2	3	0.06	0.01	0.16
Raji	HLA-C0702	GVYFASTEK	0.001413	8.282	0.072086	18.021	22921.3	NB	JY alleles	FALSE	Raji_S	SPIKE_SARS2	P0DTC2	s0089-0097	89	97	9	8 to 13 AAs	1	None	GVYFASTEK	GVYFASTEK	2	5	0.000291503	9.9047	1.53395	PROSIT		0.79	0.89	1312627	89	97	100%	74	16	7	1	0.22	0.14	0.32
Raji	HLA-C0702	VYDPLQPEL	0.871354	0.006	0.475003	0.152	293.05	SB	JY alleles	FALSE	Raji_S	SPIKE_SARS2	P0DTC2	s1137-1145	1137	1145	9	8 to 13 AAs	1	None	VYDPLQPEL	VYDPLQPEL	2	6	8.71232e-05	13.669	0.832357	Standard	1	0.94	1	71996	1137	1145	100%	19	1	1	1	0.05	0	0.22
Raji	HLA-C0702	TYVPAQEK	0.000903	10.271	0.066622	20.167	24317.3	NB	JY alleles	FALSE	Raji_S	SPIKE_SARS2	P0DTC2	s1066-1073	1066	1073	8	8 to 13 AAs	1	None	TYVPAQEK	TYVPAQEK	1	1	0.000151492	9.31841		Standard	1	0.95	1
Raji	HLA-C0702	SASFSTFK	4.4e-05	33.5	0.044904	33.053	30758.7	NB	JY alleles	FALSE	Raji_S	SPIKE_SARS2	P0DTC2	s0371-0378	371	378	8	8 to 13 AAs	1	None	SASFSTFK	SASFSTFK	2	2	0.00165581	10.7441	2.00901	PROSIT		0.83	0.93
Raji	HLA-C0702	NSASFSTFK	0.001209	8.915	0.117544	8.129	14016.3	NB	JY alleles	FALSE	Raji_S	SPIKE_SARS2	P0DTC2	s0370-0378	370	378	9	8 to 13 AAs	1	None	NSASFSTFK	NSASFSTFK	2	2	8.71232e-05	10.608	2.23818	PROSIT		0.76	0.86	1313244	370	378	100%	23	3	3	2	0.13	0.03	0.3
Raji	HLA-C0702	NRALTGIAV	0.026402	1.583	0.294403	0.926	2068.14	WB	JY alleles	FALSE	Raji_S	SPIKE_SARS2	P0DTC2	s0764-0772	764	772	9	8 to 13 AAs	2	None	NRALTGIAV	NRALTGIAV	2	4	0.00195262	10.6192	1.00314	Standard	1	0.93	0.99
Raji	HLA-C0702	TLKSFTVEK	0.003338	5.424	0.117067	8.186	14088.9	NB	JY alleles	FALSE	Raji_S	SPIKE_SARS2	P0DTC2	s0302-0310	302	310	9	8 to 13 AAs	2	None	TLKSFTVEK	TLKSFTVEK	1	3	0	6.5803	0.75057	PROSIT		0.71	0.87	1313756	302	310	100%	21	1	1	2	0.05	0	0.2
Raji	HLA-C0702	RQIAPGQTGK	0.001499	8.053	0.052804	27.33	28238.8	NB	JY alleles	FALSE	Raji_S	SPIKE_SARS2	P0DTC2	s0408-0417	408	417	10	8 to 13 AAs	2	None	RQIAPGQTGK	RQIAPGQTGK	2	6	0	8.9873	1.34055	PROSIT		0.63	0.76	1330580	408	417	100%	10	0	0	1	0	0	0.25
Raji	HLA-A0201	KCYGVSPTKL	0.015333	5.467	0.150658	14.518	9795.63	NB	JY alleles	FALSE	Raji_S	SPIKE_SARS2	P0DTC2	s0378-0387	378	387	10	8 to 13 AAs	2	None; Cysteinylation; Acetylation (N-term); Cysteinylation	KCYGVSPTKL; KC(+119.00)YGVSPTKL; K(+42.01)C(+119.00)YGVSPTKL	KCYGVSPTKL	2	6	0	10.706	2.16313	NP				1630363	378	387	100%	5	0	0	1	0	0	0.43
Raji	HLA-A0201	PLQPELDSF	0.00237	12.675	0.058595	36.103	26523.7	NB	JY alleles	FALSE	Raji_S	SPIKE_SARS2	P0DTC2	s1140-1148	1140	1148	9	8 to 13 AAs	1	None	PLQPELDSF	PLQPELDSF	1	2	0.00760985	7.58353		PROSIT		0.71	0.86
Raji	HLA-A0201	RVYSTGSNVFQTR	0.000311	27.839	0.074558	29.393	22316.4	NB	JY alleles	FALSE	Raji_S	SPIKE_SARS2	P0DTC2	s0634-0646	634	646	13	8 to 13 AAs	3	None	RVYSTGSNVFQTR	RVYSTGSNVFQTR	2	6	0	13.6759	3.13108	PROSIT		0.84	0.95
Raji	HLA-A0201	SIIAYTMSL	0.580032	0.3	0.721492	0.294	20.36	SB	JY alleles	FALSE	Raji_S	SPIKE_SARS2	P0DTC2	s0691-0699	691	699	9	8 to 13 AAs	1	None; Oxidation (M)	SIIAYTMSL; SIIAYTM(+15.99)SL	SIIAYTMSL	2	6	0	11.6613	1.73362	Standard	1	0.89	0.97	1309137	691	699	100%	162	74	12	4	0.46	0.38	0.53
Raji	HLA-A0201	GVLTESNKK	0.000252	30.091	0.025086	65.718	38114.6	NB	JY alleles	FALSE	Raji_S	SPIKE_SARS2	P0DTC2	s0550-0558	550	558	9	8 to 13 AAs	2	None	GVLTESNKK	GVLTESNKK	1	1	0.015959	7.25541		PROSIT		0.81	0.94	1547617	550	558	100%	11	0	0	2	0	0	0.23
Raji	HLA-A0201	VLYNSASFSTFK	0.000284	28.815	0.144264	15.217	10497.3	NB	JY alleles	FALSE	Raji_S	SPIKE_SARS2	P0DTC2	s0367-0378	367	378	12	8 to 13 AAs	2	None	VLYNSASFSTFK	VLYNSASFSTFK	2	5	0	14.5088	1.1654	PROSIT		0.81	0.94	1526436	367	378	100%	2	2	2	0	1	0.22	1
Raji	HLA-A0201	PLQPELDSFK	0.000178	34	0.043533	45.81	31218.3	NB	JY alleles	FALSE	Raji_S	SPIKE_SARS2	P0DTC2	s1140-1149	1140	1149	10	8 to 13 AAs	2	None	PLQPELDSFK	PLQPELDSFK	2	4	0	8.865	0.209326	PROSIT		0.71	0.88

## Sheet: peptides_ms_summary
Cell.Line	Condition	GeneOrganism	ProteinFirst	Sequence	Seq.ID	start	end	Length	Length_range	Charge	PTM	Peptides.Modified	Peptides	n_BioReplicate	n_TechReplicate	ms2r_q_value_pep	Log2Area_mean	Log2Area_sd
Raji	Raji_S	SPIKE_SARS2	P0DTC2	AIHVSGTNGTK	s0067-0077	67	77	11	8 to 13 AAs	2	None	AIHVSGTNGTK	AIHVSGTNGTK	2	5	0	8.78582	1.93964
Raji	Raji_S	SPIKE_SARS2	P0DTC2	GVYFASTEK	s0089-0097	89	97	9	8 to 13 AAs	1	None	GVYFASTEK	GVYFASTEK	2	5	0.000291503	9.9047	1.53395
Raji	Raji_S	SPIKE_SARS2	P0DTC2	TLKSFTVEK	s0302-0310	302	310	9	8 to 13 AAs	2	None	TLKSFTVEK	TLKSFTVEK	1	3	0	6.5803	0.75057
Raji	Raji_S	SPIKE_SARS2	P0DTC2	VLYNSASFSTFK	s0367-0378	367	378	12	8 to 13 AAs	2	None	VLYNSASFSTFK	VLYNSASFSTFK	2	5	0	14.5088	1.1654
Raji	Raji_S	SPIKE_SARS2	P0DTC2	LYNSASFSTFK	s0368-0378	368	378	11	8 to 13 AAs	1	None	LYNSASFSTFK	LYNSASFSTFK	1	1	0.0215782	5.59702
Raji	Raji_S	SPIKE_SARS2	P0DTC2	NSASFSTFK	s0370-0378	370	378	9	8 to 13 AAs	1	None	NSASFSTFK	NSASFSTFK	2	2	8.71232e-05	10.608	2.23818
Raji	Raji_S	SPIKE_SARS2	P0DTC2	SASFSTFK	s0371-0378	371	378	8	8 to 13 AAs	1	None	SASFSTFK	SASFSTFK	2	2	0.00165581	10.7441	2.00901
Raji	Raji_S	SPIKE_SARS2	P0DTC2	KCYGVSPTKL	s0378-0387	378	387	10	8 to 13 AAs	2	None; Cysteinylation; Acetylation (N-term); Cysteinylation	KCYGVSPTKL; KC(+119.00)YGVSPTKL; K(+42.01)C(+119.00)YGVSPTKL	KCYGVSPTKL	2	6	0	10.706	2.16313
Raji	Raji_S	SPIKE_SARS2	P0DTC2	YGVSPTKL	s0380-0387	380	387	8	8 to 13 AAs	2	None	YGVSPTKL	YGVSPTKL	2	4	0.000348238	8.17302	2.18166
Raji	Raji_S	SPIKE_SARS2	P0DTC2	RQIAPGQTGK	s0408-0417	408	417	10	8 to 13 AAs	2	None	RQIAPGQTGK	RQIAPGQTGK	2	6	0	8.9873	1.34055
Raji	Raji_S	SPIKE_SARS2	P0DTC2	GVLTESNKK	s0550-0558	550	558	9	8 to 13 AAs	2	None	GVLTESNKK	GVLTESNKK	1	1	0.015959	7.25541
Raji	Raji_S	SPIKE_SARS2	P0DTC2	RVYSTGSNVFQTR	s0634-0646	634	646	13	8 to 13 AAs	3	None	RVYSTGSNVFQTR	RVYSTGSNVFQTR	2	6	0	13.6759	3.13108
JY	JY_S	SPIKE_SARS2	P0DTC2	SIIAYTMSL	s0691-0699	691	699	9	8 to 13 AAs	1	None; Oxidation (M)	SIIAYTMSL; SIIAYTM(+15.99)SL	SIIAYTMSL	2	6	0.000228728	9.04343	0.994
Raji	Raji_S	SPIKE_SARS2	P0DTC2	SIIAYTMSL	s0691-0699	691	699	9	8 to 13 AAs	1	None; Oxidation (M)	SIIAYTMSL; SIIAYTM(+15.99)SL	SIIAYTMSL	2	6	0	11.6613	1.73362
JY	JY_S	SPIKE_SARS2	P0DTC2	IPTNFTISV	s0714-0722	714	722	9	8 to 13 AAs	1	None	IPTNFTISV	IPTNFTISV	2	5	0.00616349	8.44266	0.056434
Raji	Raji_S	SPIKE_SARS2	P0DTC2	NRALTGIAV	s0764-0772	764	772	9	8 to 13 AAs	2	None	NRALTGIAV	NRALTGIAV	2	4	0.00195262	10.6192	1.00314
JY	JY_S	SPIKE_SARS2	P0DTC2	RLDKVEAEV	s0983-0991	983	991	9	8 to 13 AAs	2	None	RLDKVEAEV	RLDKVEAEV	2	4	0.000874682	11.454	0.279281
JY	JY_S	SPIKE_SARS2	P0DTC2	RLQSLQTYV	s1000-1008	1000	1008	9	8 to 13 AAs	2	None	RLQSLQTYV	RLQSLQTYV	1	1	0.00747644	#NUM!
JY	JY_S	SPIKE_SARS2	P0DTC2	APHGVVFL	s1056-1063	1056	1063	8	8 to 13 AAs	1	None	APHGVVFL	APHGVVFL	1	2	0.00031263	10.7084	1.08716
Raji	Raji_S	SPIKE_SARS2	P0DTC2	VTYVPAQEK	s1065-1073	1065	1073	9	8 to 13 AAs	2	None	VTYVPAQEK	VTYVPAQEK	2	5	0	12.4685	1.29921
Raji	Raji_S	SPIKE_SARS2	P0DTC2	TYVPAQEK	s1066-1073	1066	1073	8	8 to 13 AAs	1	None	TYVPAQEK	TYVPAQEK	1	1	0.000151492	9.31841
Raji	Raji_S	SPIKE_SARS2	P0DTC2	VYDPLQPEL	s1137-1145	1137	1145	9	8 to 13 AAs	1	None	VYDPLQPEL	VYDPLQPEL	2	6	8.71232e-05	13.669	0.832357
Raji	Raji_S	SPIKE_SARS2	P0DTC2	PLQPELDSF	s1140-1148	1140	1148	9	8 to 13 AAs	1	None	PLQPELDSF	PLQPELDSF	1	2	0.00760985	7.58353
Raji	Raji_S	SPIKE_SARS2	P0DTC2	PLQPELDSFK	s1140-1149	1140	1149	10	8 to 13 AAs	2	None	PLQPELDSFK	PLQPELDSFK	2	4	0	8.865	0.209326

## Sheet: validation
Cell.Line	Peptide	Sequence	Charge	Seq.ID	Synthetic	PROSIT	iRT_synthetic	ValidationType	iRT_JY_Raji	Ratio_iRT	SA	PCC	Comments
Raji	AIHVSGTNGTK	AIHVSGTNGTK	2	s0067-0077	FALSE	CID		PROSIT	-40.6451		0.4	0.47
JY	APHGVVFL	APHGVVFL	1	s1056-1063	TRUE	FALSE	50.0626	Standard	50.0626	1	0.75	0.85
Raji	GVLTESNKK	GVLTESNKK	2	s0550-0558	FALSE	HCD		PROSIT	-43.8584		0.81	0.94
Raji	GVYFASTEK	GVYFASTEK	1	s0089-0097	FALSE	HCD		PROSIT	5.3677		0.79	0.89
JY	IPTNFTISV	IPTNFTISV	1	s0714-0722	FALSE	CID		PROSIT	89.7761		0.8	0.93
Raji	K(+42.01)C(+119.00)YGVSPTKL	KCYGVSPTKL	2	s0378-0387	FALSE	FALSE			31.7777				PROSIT not posible without carbamidomethylation
Raji	KC(+119.00)YGVSPTKL	KCYGVSPTKL	2	s0378-0387	FALSE	FALSE			11.8143
Raji	KCYGVSPTKL	KCYGVSPTKL	2	s0378-0387	FALSE	NoPROSIT		NP	11.8143				PROSIT not posible without carbamidomethylation
Raji	LYNSASFSTFK	LYNSASFSTFK	1	s0368-0378	FALSE	HCD		PROSIT	38.4851		0.51	0.53
Raji	NRALTGIAV	NRALTGIAV	2	s0764-0772	TRUE	FALSE	33.487	Standard	33.487	1	0.93	0.99
Raji	NSASFSTFK	NSASFSTFK	1	s0370-0378	FALSE	HCD		PROSIT	6.5753		0.76	0.86
Raji	PLQPELDSF	PLQPELDSF	1	s1140-1148	FALSE	HCD		PROSIT	76.5227		0.71	0.86
Raji	PLQPELDSFK	PLQPELDSFK	2	s1140-1149	FALSE	HCD		PROSIT	43.6535		0.71	0.88
JY	RLDKVEAEV	RLDKVEAEV	2	s0983-0991	TRUE	FALSE	1.694	Standard	1.694	1	0.86	0.97
JY	RLQSLQTYV	RLQSLQTYV	2	s1000-1008	TRUE	FALSE	46.4405	Standard	46.4405	1	0.84	0.96
Raji	RQIAPGQTGK	RQIAPGQTGK	2	s0408-0417	FALSE	HCD		PROSIT	-48.5035		0.63	0.76
Raji	RVYSTGSNVFQTR	RVYSTGSNVFQTR	3	s0634-0646	FALSE	HCD		PROSIT	1.8159		0.84	0.95
Raji	SASFSTFK	SASFSTFK	1	s0371-0378	FALSE	CID		PROSIT	6.7028		0.83	0.93
JY	SIIAYTM(+15.99)SL	SIIAYTMSL	1	s0691-0699	TRUE	FALSE	77.8793	Standard	77.8793	1	0.71	0.8
Raji	SIIAYTM(+15.99)SL	SIIAYTMSL	1	s0691-0699	TRUE	FALSE	77.8793	Standard	77.8793	1	0.88	0.97
JY	SIIAYTMSL	SIIAYTMSL	1	s0691-0699	TRUE	FALSE	103.608	Standard	103.608	1	0.69	0.79
Raji	SIIAYTMSL	SIIAYTMSL	1	s0691-0699	TRUE	FALSE	103.608	Standard	103.608	1	0.89	0.97
Raji	TLKSFTVEK	TLKSFTVEK	2	s0302-0310	FALSE	HCD		PROSIT	9.6978		0.71	0.87
Raji	TYVPAQEK	TYVPAQEK	1	s1066-1073	TRUE	FALSE	-21.1511	Standard	-21.1511	1	0.95	1
Raji	VLYNSASFSTFK	VLYNSASFSTFK	2	s0367-0378	FALSE	CID		PROSIT	49.496		0.81	0.94
Raji	VTYVPAQEK	VTYVPAQEK	2	s1065-1073	TRUE	FALSE	-5.4094	Standard	-5.4094	1	0.94	1
Raji	VYDPLQPEL	VYDPLQPEL	1	s1137-1145	TRUE	FALSE	81.509	Standard	81.509	1	0.94	1
Raji	YGVSPTKL	YGVSPTKL	2	s0380-0387	FALSE	HCD		PROSIT	20.3687		0.67	0.82

## Sheet: peptides_ms
Condition	BioReplicate	Sample	Accession	ProteinFirst	GeneFirst	OrganismFirst	TechReplicate	PeptideID	Precursor_Id	Peptide_charge	Peptide	Sequence	Seq.ID	Nter	Cter	PTM	Length	Length_range	Charge	Mass	m_z	RT	invk0_start	invk0_end	invk0	Found_By	Source_File_ID	Source_File	File_peaks_nb	n_Feature	inv10lgP	ppm	AScore	ms2r_score	ms2r_q_value_pep	ms2r_score_sample	ms2r_q_value_pep_sample	Area	Log2Area	ConditionGenotype	Cell.Line	Genotype	GeneOrganism	Charge_group	start	end
Raji_S	Raji_S1_1	Raji_S1_1_1	P0DTC2|SPIKE_SARS2	P0DTC2	SPIKE	SARS2	1	P0DTC2_432.7_2	54958	YGVSPTKL_2	YGVSPTKL	YGVSPTKL	s0380-0387	Y	L	None	8	8 to 13 AAs	2	863.475	432.745	53.4	0.788	0.7979	0.79295	PEAKS DB	G220222_043_Slot1-43_1_4281		65	5	34.68	-1.8		1.28052	0.000348238	-0.789268	0.219475	72.615	6.1822	Raji_S1	Raji	S1	SPIKE_SARS2	+ 2	380	387
Raji_S	Raji_S1_2	Raji_S1_2_1	P0DTC2|SPIKE_SARS2	P0DTC2	SPIKE	SARS2	1	P0DTC2_432.7_2	54958	YGVSPTKL_2	YGVSPTKL	YGVSPTKL	s0380-0387	Y	L	None	8	8 to 13 AAs	2	863.475	432.745	53.4	0.788	0.7979	0.79295	PEAKS DB	G220222_043_Slot1-43_1_4281		65	5	34.68	-1.8		1.28052	0.000348238	0.783307	0.00114304	2227.8	11.1214	Raji_S1	Raji	S1	SPIKE_SARS2	+ 2	380	387
Raji_S	Raji_S1_1	Raji_S1_1_3	P0DTC2|SPIKE_SARS2	P0DTC2	SPIKE	SARS2	3	P0DTC2_432.7_2	54958	YGVSPTKL_2	YGVSPTKL	YGVSPTKL	s0380-0387	Y	L	None	8	8 to 13 AAs	2	863.475	432.745	53.4	0.788	0.7979	0.79295	PEAKS DB	G220222_043_Slot1-43_1_4281		65	5	34.68	-1.8		1.28052	0.000348238	1.219	0.000211013	122.05	6.93133	Raji_S1	Raji	S1	SPIKE_SARS2	+ 2	380	387
Raji_S	Raji_S1_2	Raji_S1_2_3	P0DTC2|SPIKE_SARS2	P0DTC2	SPIKE	SARS2	3	P0DTC2_432.7_2	54958	YGVSPTKL_2	YGVSPTKL	YGVSPTKL	s0380-0387	Y	L	None	8	8 to 13 AAs	2	863.475	432.745	53.4	0.788	0.7979	0.79295	PEAKS DB	G220222_043_Slot1-43_1_4281		65	5	34.68	-1.8		1.28052	0.000348238	1.28052	0.00015367	351.44	8.45713	Raji_S1	Raji	S1	SPIKE_SARS2	+ 2	380	387
Raji_S	Raji_S2_1	Raji_S2_1_2	P0DTC2|SPIKE_SARS2	P0DTC2	SPIKE	SARS2	2	P0DTC2_457.8_2	84803	NRALTGIAV_2	NRALTGIAV	NRALTGIAV	s0764-0772	N	V	None	9	8 to 13 AAs	2	913.534	457.776	79.92	0.7944	0.8042	0.7993	PEAKS DB	G220222_031_Slot1-39_1_4269		65	4	21.8	1.5		0.924663	0.00195262	0.924663	0.000718588	1008.3	9.97771	Raji_S2	Raji	S2	SPIKE_SARS2	+ 2	764	772
Raji_S	Raji_S2_2	Raji_S2_2_2	P0DTC2|SPIKE_SARS2	P0DTC2	SPIKE	SARS2	2	P0DTC2_457.8_2	84803	NRALTGIAV_2	NRALTGIAV	NRALTGIAV	s0764-0772	N	V	None	9	8 to 13 AAs	2	913.534	457.776	79.92	0.7944	0.8042	0.7993	PEAKS DB	G220222_031_Slot1-39_1_4269		65	4	21.8	1.5		0.924663	0.00195262	0.604434	0.00228449	1260.5	10.2998	Raji_S2	Raji	S2	SPIKE_SARS2	+ 2	764	772
Raji_S	Raji_S2_1	Raji_S2_1_3	P0DTC2|SPIKE_SARS2	P0DTC2	SPIKE	SARS2	3	P0DTC2_457.8_2	84803	NRALTGIAV_2	NRALTGIAV	NRALTGIAV	s0764-0772	N	V	None	9	8 to 13 AAs	2	913.534	457.776	79.92	0.7944	0.8042	0.7993	PEAKS DB	G220222_031_Slot1-39_1_4269		65	4	21.8	1.5		0.924663	0.00195262	0.692248	0.00157188	1089.1	10.0889	Raji_S2	Raji	S2	SPIKE_SARS2	+ 2	764	772
Raji_S	Raji_S2_2	Raji_S2_2_3	P0DTC2|SPIKE_SARS2	P0DTC2	SPIKE	SARS2	3	P0DTC2_457.8_2	84803	NRALTGIAV_2	NRALTGIAV	NRALTGIAV	s0764-0772	N	V	None	9	8 to 13 AAs	2	913.534	457.776	79.92	0.7944	0.8042	0.7993	PEAKS DB	G220222_031_Slot1-39_1_4269		65	4	21.8	1.5		0.924663	0.00195262	0.873827	0.00090779	4422.2	12.1105	Raji_S2	Raji	S2	SPIKE_SARS2	+ 2	764	772
Raji_S	Raji_S1_2	Raji_S1_2_2	P0DTC2|SPIKE_SARS2	P0DTC2	SPIKE	SARS2	2	P0DTC2_488.3_2	8766	GVLTESNKK_2	GVLTESNKK	GVLTESNKK	s0550-0558	G	K	None	9	8 to 13 AAs	2	974.54	488.281	21.37	0.7995	0.8094	0.80445	PEAKS DB	G220222_026_Slot1-43_1_4264		65	1	17.33	9		0.390927	0.015959	0.390927	0.00510207	152.79	7.25541	Raji_S1	Raji	S1	SPIKE_SARS2	+ 2	550	558
Raji_S	Raji_S1_1	Raji_S1_1_1	P0DTC2|SPIKE_SARS2	P0DTC2	SPIKE	SARS2	1	P0DTC2_505.6_3	75757	RVYSTGSNVFQTR_3	RVYSTGSNVFQTR	RVYSTGSNVFQTR	s0634-0646	R	R	None	13	8 to 13 AAs	3	1513.76	505.598	64.7	0.8426	0.8525	0.84755	PEAKS DB	G220222_043_Slot1-43_1_4281		65	12	56.19	2.1		2.97209	0	1.27126	0.00015367	36783	15.1668	Raji_S1	Raji	S1	SPIKE_SARS2	≥ +3	634	646
Raji_S	Raji_S1_2	Raji_S1_2_1	P0DTC2|SPIKE_SARS2	P0DTC2	SPIKE	SARS2	1	P0DTC2_505.6_3	75757	RVYSTGSNVFQTR_3	RVYSTGSNVFQTR	RVYSTGSNVFQTR	s0634-0646	R	R	None	13	8 to 13 AAs	3	1513.76	505.598	64.7	0.8426	0.8525	0.84755	PEAKS DB	G220222_043_Slot1-43_1_4281		65	12	56.19	2.1		2.97209	0	1.8871	0	97814	16.5778	Raji_S1	Raji	S1	SPIKE_SARS2	≥ +3	634	646
Raji_S	Raji_S1_1	Raji_S1_1_2	P0DTC2|SPIKE_SARS2	P0DTC2	SPIKE	SARS2	2	P0DTC2_505.6_3	75757	RVYSTGSNVFQTR_3	RVYSTGSNVFQTR	RVYSTGSNVFQTR	s0634-0646	R	R	None	13	8 to 13 AAs	3	1513.76	505.598	64.7	0.8426	0.8525	0.84755	PEAKS DB	G220222_043_Slot1-43_1_4281		65	12	56.19	2.1		2.97209	0	2.9286	0	4666.4	12.1881	Raji_S1	Raji	S1	SPIKE_SARS2	≥ +3	634	646
Raji_S	Raji_S1_2	Raji_S1_2_2	P0DTC2|SPIKE_SARS2	P0DTC2	SPIKE	SARS2	2	P0DTC2_505.6_3	75757	RVYSTGSNVFQTR_3	RVYSTGSNVFQTR	RVYSTGSNVFQTR	s0634-0646	R	R	None	13	8 to 13 AAs	3	1513.76	505.598	64.7	0.8426	0.8525	0.84755	PEAKS DB	G220222_043_Slot1-43_1_4281		65	12	56.19	2.1		2.97209	0	1.30003	0.00013441	32534	14.9897	Raji_S1	Raji	S1	SPIKE_SARS2	≥ +3	634	646
Raji_S	Raji_S1_1	Raji_S1_1_3	P0DTC2|SPIKE_SARS2	P0DTC2	SPIKE	SARS2	3	P0DTC2_505.6_3	75757	RVYSTGSNVFQTR_3	RVYSTGSNVFQTR	RVYSTGSNVFQTR	s0634-0646	R	R	None	13	8 to 13 AAs	3	1513.76	505.598	64.7	0.8426	0.8525	0.84755	PEAKS DB	G220222_043_Slot1-43_1_4281		65	12	56.19	2.1		2.97209	0	2.49209	0	254.81	7.99328	Raji_S1	Raji	S1	SPIKE_SARS2	≥ +3	634	646
Raji_S	Raji_S1_2	Raji_S1_2_3	P0DTC2|SPIKE_SARS2	P0DTC2	SPIKE	SARS2	3	P0DTC2_505.6_3	75757	RVYSTGSNVFQTR_3	RVYSTGSNVFQTR	RVYSTGSNVFQTR	s0634-0646	R	R	None	13	8 to 13 AAs	3	1513.76	505.598	64.7	0.8426	0.8525	0.84755	PEAKS DB	G220222_043_Slot1-43_1_4281		65	12	56.19	2.1		2.97209	0	2.97209	0	36104	15.1399	Raji_S1	Raji	S1	SPIKE_SARS2	≥ +3	634	646
Raji_S	Raji_S2_2	Raji_S2_2_1	P0DTC2|SPIKE_SARS2	P0DTC2	SPIKE	SARS2	1	P0DTC2_517.8_2	24108	VTYVPAQEK_2	VTYVPAQEK	VTYVPAQEK	s1065-1073	V	K	None	9	8 to 13 AAs	2	1033.54	517.782	43.2	0.8763	0.8862	0.88125	PEAKS DB	G220222_049_Slot1-42_1_4287		65	8	34.19	2.6		1.84276	0	-0.427832	0.0966669	0		Raji_S2	Raji	S2	SPIKE_SARS2	+ 2	1065	1073
Raji_S	Raji_S2_1	Raji_S2_1_2	P0DTC2|SPIKE_SARS2	P0DTC2	SPIKE	SARS2	2	P0DTC2_517.8_2	24108	VTYVPAQEK_2	VTYVPAQEK	VTYVPAQEK	s1065-1073	V	K	None	9	8 to 13 AAs	2	1033.54	517.782	43.2	0.8763	0.8862	0.88125	PEAKS DB	G220222_049_Slot1-42_1_4287		65	8	34.19	2.6		1.84276	0	1.52842	0	3069.3	11.5837	Raji_S2	Raji	S2	SPIKE_SARS2	+ 2	1065	1073
Raji_S	Raji_S2_2	Raji_S2_2_2	P0DTC2|SPIKE_SARS2	P0DTC2	SPIKE	SARS2	2	P0DTC2_517.8_2	24108	VTYVPAQEK_2	VTYVPAQEK	VTYVPAQEK	s1065-1073	V	K	None	9	8 to 13 AAs	2	1033.54	517.782	43.2	0.8763	0.8862	0.88125	PEAKS DB	G220222_049_Slot1-42_1_4287		65	8	34.19	2.6		1.84276	0	1.28159	0.00015367	10282	13.3278	Raji_S2	Raji	S2	SPIKE_SARS2	+ 2	1065	1073
Raji_S	Raji_S2_1	Raji_S2_1_3	P0DTC2|SPIKE_SARS2	P0DTC2	SPIKE	SARS2	3	P0DTC2_517.8_2	24108	VTYVPAQEK_2	VTYVPAQEK	VTYVPAQEK	s1065-1073	V	K	None	9	8 to 13 AAs	2	1033.54	517.782	43.2	0.8763	0.8862	0.88125	PEAKS DB	G220222_049_Slot1-42_1_4287		65	8	34.19	2.6		1.84276	0	1.84276	0	2273.1	11.1504	Raji_S2	Raji	S2	SPIKE_SARS2	+ 2	1065	1073
Raji_S	Raji_S2_2	Raji_S2_2_3	P0DTC2|SPIKE_SARS2	P0DTC2	SPIKE	SARS2	3	P0DTC2_517.8_2	24108	VTYVPAQEK_2	VTYVPAQEK	VTYVPAQEK	s1065-1073	V	K	None	9	8 to 13 AAs	2	1033.54	517.782	43.2	0.8763	0.8862	0.88125	PEAKS DB	G220222_049_Slot1-42_1_4287		65	8	34.19	2.6		1.84276	0	1.59859	0	14383	13.8121	Raji_S2	Raji	S2	SPIKE_SARS2	+ 2	1065	1073
Raji_S	Raji_S1_2	Raji_S1_2_1	P0DTC2|SPIKE_SARS2	P0DTC2	SPIKE	SARS2	1	P0DTC2_526.8_2	57553	TLKSFTVEK_2	TLKSFTVEK	TLKSFTVEK	s0302-0310	T	K	None	9	8 to 13 AAs	2	1051.59	526.803	54.78	0.8878	0.8977	0.89275	PEAKS DB	G220222_043_Slot1-43_1_4281		65	3	35.55	-2.1		1.51492	0	0.25662	0.00865952	66.237	6.04957	Raji_S1	Raji	S1	SPIKE_SARS2	+ 2	302	310
Raji_S	Raji_S1_2	Raji_S1_2_2	P0DTC2|SPIKE_SARS2	P0DTC2	SPIKE	SARS2	2	P0DTC2_526.8_2	57553	TLKSFTVEK_2	TLKSFTVEK	TLKSFTVEK	s0302-0310	T	K	None	9	8 to 13 AAs	2	1051.59	526.803	54.78	0.8878	0.8977	0.89275	PEAKS DB	G220222_043_Slot1-43_1_4281		65	3	35.55	-2.1		1.51492	0	0.817686	0.00103904	0		Raji_S1	Raji	S1	SPIKE_SARS2	+ 2	302	310
Raji_S	Raji_S1_2	Raji_S1_2_3	P0DTC2|SPIKE_SARS2	P0DTC2	SPIKE	SARS2	3	P0DTC2_526.8_2	57553	TLKSFTVEK_2	TLKSFTVEK	TLKSFTVEK	s0302-0310	T	K	None	9	8 to 13 AAs	2	1051.59	526.803	54.78	0.8878	0.8977	0.89275	PEAKS DB	G220222_043_Slot1-43_1_4281		65	3	35.55	-2.1		1.51492	0	1.51492	0	138.24	7.11103	Raji_S1	Raji	S1	SPIKE_SARS2	+ 2	302	310
Raji_S	Raji_S1_1	Raji_S1_1_1	P0DTC2|SPIKE_SARS2	P0DTC2	SPIKE	SARS2	1	P0DTC2_528.3_2	10138	RQIAPGQTGK_2	RQIAPGQTGK	RQIAPGQTGK	s0408-0417	R	K	None	10	8 to 13 AAs	2	1054.59	528.304	22.12	0.8589	0.8688	0.86385	PEAKS DB	G220222_043_Slot1-43_1_4281		65	7	43.79	2.3		2.17666	0	1.63083	0	627.3	9.29301	Raji_S1	Raji	S1	SPIKE_SARS2	+ 2	408	417
Raji_S	Raji_S1_2	Raji_S1_2_1	P0DTC2|SPIKE_SARS2	P0DTC2	SPIKE	SARS2	1	P0DTC2_528.3_2	10138	RQIAPGQTGK_2	RQIAPGQTGK	RQIAPGQTGK	s0408-0417	R	K	None	10	8 to 13 AAs	2	1054.59	528.304	22.12	0.8589	0.8688	0.86385	PEAKS DB	G220222_043_Slot1-43_1_4281		65	7	43.79	2.3		2.17666	0	1.44188	5.96454e-05	2141.4	11.0643	Raji_S1	Raji	S1	SPIKE_SARS2	+ 2	408	417
Raji_S	Raji_S1_1	Raji_S1_1_2	P0DTC2|SPIKE_SARS2	P0DTC2	SPIKE	SARS2	2	P0DTC2_528.3_2	10138	RQIAPGQTGK_2	RQIAPGQTGK	RQIAPGQTGK	s0408-0417	R	K	None	10	8 to 13 AAs	2	1054.59	528.304	22.12	0.8589	0.8688	0.86385	PEAKS DB	G220222_043_Slot1-43_1_4281		65	7	43.79	2.3		2.17666	0	1.73016	0	144.87	7.17862	Raji_S1	Raji	S1	SPIKE_SARS2	+ 2	408	417
Raji_S	Raji_S1_2	Raji_S1_2_2	P0DTC2|SPIKE_SARS2	P0DTC2	SPIKE	SARS2	2	P0DTC2_528.3_2	10138	RQIAPGQTGK_2	RQIAPGQTGK	RQIAPGQTGK	s0408-0417	R	K	None	10	8 to 13 AAs	2	1054.59	528.304	22.12	0.8589	0.8688	0.86385	PEAKS DB	G220222_043_Slot1-43_1_4281		65	7	43.79	2.3		2.17666	0	1.73404	0	621.54	9.2797	Raji_S1	Raji	S1	SPIKE_SARS2	+ 2	408	417
Raji_S	Raji_S1_1	Raji_S1_1_3	P0DTC2|SPIKE_SARS2	P0DTC2	SPIKE	SARS2	3	P0DTC2_528.3_2	10138	RQIAPGQTGK_2	RQIAPGQTGK	RQIAPGQTGK	s0408-0417	R	K	None	10	8 to 13 AAs	2	1054.59	528.304	22.12	0.8589	0.8688	0.86385	PEAKS DB	G220222_043_Slot1-43_1_4281		65	7	43.79	2.3		2.17666	0	1.7052	0	239.49	7.90382	Raji_S1	Raji	S1	SPIKE_SARS2	+ 2	408	417
Raji_S	Raji_S1_2	Raji_S1_2_3	P0DTC2|SPIKE_SARS2	P0DTC2	SPIKE	SARS2	3	P0DTC2_528.3_2	10138	RQIAPGQTGK_2	RQIAPGQTGK	RQIAPGQTGK	s0408-0417	R	K	None	10	8 to 13 AAs	2	1054.59	528.304	22.12	0.8589	0.8688	0.86385	PEAKS DB	G220222_043_Slot1-43_1_4281		65	7	43.79	2.3		2.17666	0	2.17666	0	589.9	9.20433	Raji_S1	Raji	S1	SPIKE_SARS2	+ 2	408	417
JY_S	JY_S2_2	JY_S2_2_1	P0DTC2|SPIKE_SARS2	P0DTC2	SPIKE	SARS2	1	P0DTC2_529.8_2	87283	RLDKVEAEV_2	RLDKVEAEV	RLDKVEAEV	s0983-0991	R	V	None	9	8 to 13 AAs	2	1057.58	529.796	75.31	0.8589	0.8689	0.8639	PEAKS DB	G220215_018_Slot1-32_1_4186		23	3	23.54	0.4		1.05671	0.000874682	1.05671	0.000434874	2321.5	11.1808	JY_S2	JY	S2	SPIKE_SARS2	+ 2	983	991
JY_S	JY_S2_1	JY_S2_1_2	P0DTC2|SPIKE_SARS2	P0DTC2	SPIKE	SARS2	2	P0DTC2_529.8_2	87283	RLDKVEAEV_2	RLDKVEAEV	RLDKVEAEV	s0983-0991	R	V	None	9	8 to 13 AAs	2	1057.58	529.796	75.31	0.8589	0.8689	0.8639	PEAKS DB	G220215_018_Slot1-32_1_4186		23	3	23.54	0.4		1.05671	0.000874682	-0.182964	0.0411474	0		JY_S2	JY	S2	SPIKE_SARS2	+ 2	983	991
JY_S	JY_S2_2	JY_S2_2_2	P0DTC2|SPIKE_SARS2	P0DTC2	SPIKE	SARS2	2	P0DTC2_529.8_2	87283	RLDKVEAEV_2	RLDKVEAEV	RLDKVEAEV	s0983-0991	R	V	None	9	8 to 13 AAs	2	1057.58	529.796	75.31	0.8589	0.8689	0.8639	PEAKS DB	G220215_018_Slot1-32_1_4186		23	3	23.54	0.4		1.05671	0.000874682	0.741682	0.00134903	3418.2	11.739	JY_S2	JY	S2	SPIKE_SARS2	+ 2	983	991
JY_S	JY_S2_2	JY_S2_2_3	P0DTC2|SPIKE_SARS2	P0DTC2	SPIKE	SARS2	3	P0DTC2_529.8_2	87283	RLDKVEAEV_2	RLDKVEAEV	RLDKVEAEV	s0983-0991	R	V	None	9	8 to 13 AAs	2	1057.58	529.796	75.31	0.8589	0.8689	0.8639	PEAKS DB	G220215_018_Slot1-32_1_4186		23	3	23.54	0.4		1.05671	0.000874682	0.738037	0.00136422	2782.2	11.442	JY_S2	JY	S2	SPIKE_SARS2	+ 2	983	991
Raji_S	Raji_S1_1	Raji_S1_1_1	P0DTC2|SPIKE_SARS2	P0DTC2	SPIKE	SARS2	1	P0DTC2_542.8_2	9820	AIHVSGTNGTK_2	AIHVSGTNGTK	AIHVSGTNGTK	s0067-0077	A	K	None	11	8 to 13 AAs	2	1083.57	542.793	21.88	0.8672	0.8771	0.87215	PEAKS DB	G220222_043_Slot1-43_1_4281		65	5	40.63	0.1		1.70327	0	0.908791	0.000739469	97.639	6.60939	Raji_S1	Raji	S1	SPIKE_SARS2	+ 2	67	77
Raji_S	Raji_S1_1	Raji_S1_1_2	P0DTC2|SPIKE_SARS2	P0DTC2	SPIKE	SARS2	2	P0DTC2_542.8_2	9820	AIHVSGTNGTK_2	AIHVSGTNGTK	AIHVSGTNGTK	s0067-0077	A	K	None	11	8 to 13 AAs	2	1083.57	542.793	21.88	0.8672	0.8771	0.87215	PEAKS DB	G220222_043_Slot1-43_1_4281		65	5	40.63	0.1		1.70327	0	1.06906	0.000355476	0		Raji_S1	Raji	S1	SPIKE_SARS2	+ 2	67	77
Raji_S	Raji_S1_2	Raji_S1_2_2	P0DTC2|SPIKE_SARS2	P0DTC2	SPIKE	SARS2	2	P0DTC2_542.8_2	9820	AIHVSGTNGTK_2	AIHVSGTNGTK	AIHVSGTNGTK	s0067-0077	A	K	None	11	8 to 13 AAs	2	1083.57	542.793	21.88	0.8672	0.8771	0.87215	PEAKS DB	G220222_043_Slot1-43_1_4281		65	5	40.63	0.1		1.70327	0	1.48836	3.14283e-05	683.25	9.41627	Raji_S1	Raji	S1	SPIKE_SARS2	+ 2	67	77
Raji_S	Raji_S1_1	Raji_S1_1_3	P0DTC2|SPIKE_SARS2	P0DTC2	SPIKE	SARS2	3	P0DTC2_542.8_2	9820	AIHVSGTNGTK_2	AIHVSGTNGTK	AIHVSGTNGTK	s0067-0077	A	K	None	11	8 to 13 AAs	2	1083.57	542.793	21.88	0.8672	0.8771	0.87215	PEAKS DB	G220222_043_Slot1-43_1_4281		65	5	40.63	0.1		1.70327	0	1.21231	0.000219529	0		Raji_S1	Raji	S1	SPIKE_SARS2	+ 2	67	77
Raji_S	Raji_S1_2	Raji_S1_2_3	P0DTC2|SPIKE_SARS2	P0DTC2	SPIKE	SARS2	3	P0DTC2_542.8_2	9820	AIHVSGTNGTK_2	AIHVSGTNGTK	AIHVSGTNGTK	s0067-0077	A	K	None	11	8 to 13 AAs	2	1083.57	542.793	21.88	0.8672	0.8771	0.87215	PEAKS DB	G220222_043_Slot1-43_1_4281		65	5	40.63	0.1		1.70327	0	1.70327	0	1288.8	10.3318	Raji_S1	Raji	S1	SPIKE_SARS2	+ 2	67	77
Raji_S	Raji_S1_1	Raji_S1_1_1	P0DTC2|SPIKE_SARS2	P0DTC2	SPIKE	SARS2	1	P0DTC2_548.3_2	62669	KCYGVSPTKL_2	KCYGVSPTKL	KCYGVSPTKL	s0378-0387	K	L	None	10	8 to 13 AAs	2	1094.58	548.299	45.25	0.8694	0.8795	0.87445	PEAKS DB	G220202_008_Slot1-37_1_4099		65	1	30.81	7.9		1.82489	0	1.40181	9.85513e-05	349.36	8.44857	Raji_S1	Raji	S1	SPIKE_SARS2	+ 2	378	387
Raji_S	Raji_S1_2	Raji_S1_2_3	P0DTC2|SPIKE_SARS2	P0DTC2	SPIKE	SARS2	3	P0DTC2_548.3_2	62669	KCYGVSPTKL_2	KCYGVSPTKL	KCYGVSPTKL	s0378-0387	K	L	None	10	8 to 13 AAs	2	1094.58	548.299	45.25	0.8694	0.8795	0.87445	PEAKS DB	G220202_008_Slot1-37_1_4099		65	1	30.81	7.9		1.82489	0	1.55126	0	0		Raji_S1	Raji	S1	SPIKE_SARS2	+ 2	378	387
JY_S	JY_S2_1	JY_S2_1_3	P0DTC2|SPIKE_SARS2	P0DTC2	SPIKE	SARS2	3	P0DTC2_554.3_2	101250	RLQSLQTYV_2	RLQSLQTYV	RLQSLQTYV	s1000-1008	R	V	None	9	8 to 13 AAs	2	1106.61	554.306	79.99	0.8974	0.9074	0.9024	PEAKS DB	G220215_043_Slot1-31_1_4211		23	0	16.8	-10.6		0.565465	0.00747644	0.565465	0.00269662	0		JY_S2	JY	S2	SPIKE_SARS2	+ 2	1000	1008
Raji_S	Raji_S2_1	Raji_S2_1_2	P0DTC2|SPIKE_SARS2	P0DTC2	SPIKE	SARS2	2	P0DTC2_587.3_2	107794	PLQPELDSFK_2	PLQPELDSFK	PLQPELDSFK	s1140-1149	P	K	None	10	8 to 13 AAs	2	1172.61	587.314	92.54	0.9346	0.9446	0.9396	PEAKS DB	G220222_049_Slot1-42_1_4287		65	4	40.63	1.5		1.60267	0	1.31295	0.00013441	458.5	8.84078	Raji_S2	Raji	S2	SPIKE_SARS2	+ 2	1140	1149
Raji_S	Raji_S2_2	Raji_S2_2_2	P0DTC2|SPIKE_SARS2	P0DTC2	SPIKE	SARS2	2	P0DTC2_587.3_2	107794	PLQPELDSFK_2	PLQPELDSFK	PLQPELDSFK	s1140-1149	P	K	None	10	8 to 13 AAs	2	1172.61	587.314	92.54	0.9346	0.9446	0.9396	PEAKS DB	G220222_049_Slot1-42_1_4287		65	4	40.63	1.5		1.60267	0	1.52716	0	500.16	8.96625	Raji_S2	Raji	S2	SPIKE_SARS2	+ 2	1140	1149
Raji_S	Raji_S2_1	Raji_S2_1_3	P0DTC2|SPIKE_SARS2	P0DTC2	SPIKE	SARS2	3	P0DTC2_587.3_2	107794	PLQPELDSFK_2	PLQPELDSFK	PLQPELDSFK	s1140-1149	P	K	None	10	8 to 13 AAs	2	1172.61	587.314	92.54	0.9346	0.9446	0.9396	PEAKS DB	G220222_049_Slot1-42_1_4287		65	4	40.63	1.5		1.60267	0	1.60267	0	383.73	8.58395	Raji_S2	Raji	S2	SPIKE_SARS2	+ 2	1140	1149
Raji_S	Raji_S2_2	Raji_S2_2_3	P0DTC2|SPIKE_SARS2	P0DTC2	SPIKE	SARS2	3	P0DTC2_587.3_2	107794	PLQPELDSFK_2	PLQPELDSFK	PLQPELDSFK	s1140-1149	P	K	None	10	8 to 13 AAs	2	1172.61	587.314	92.54	0.9346	0.9446	0.9396	PEAKS DB	G220222_049_Slot1-42_1_4287		65	4	40.63	1.5		1.60267	0	1.59477	0	537.09	9.06902	Raji_S2	Raji	S2	SPIKE_SARS2	+ 2	1140	1149
Raji_S	Raji_S1_1	Raji_S1_1_1	P0DTC2|SPIKE_SARS2	P0DTC2	SPIKE	SARS2	1	P0DTC2_607.8_2	66371	KCYGVSPTKL_2	KC(+119.00)YGVSPTKL	KCYGVSPTKL	s0378-0387	K	L	Cysteinylation	10	8 to 13 AAs	2	1213.58	607.8	37.03	0.9074	0.9175	0.91245	PEAKS DB	G220202_009_Slot1-40_1_4100		65	13	45	4.9	C2:Cysteinylation:1000.00	1.82489	0	1.40181	9.85513e-05	7596.3	12.8911	Raji_S1	Raji	S1	SPIKE_SARS2	+ 2	378	387
Raji_S	Raji_S1_2	Raji_S1_2_1	P0DTC2|SPIKE_SARS2	P0DTC2	SPIKE	SARS2	1	P0DTC2_607.8_2	66371	KCYGVSPTKL_2	KC(+119.00)YGVSPTKL	KCYGVSPTKL	s0378-0387	K	L	Cysteinylation	10	8 to 13 AAs	2	1213.58	607.8	37.03	0.9074	0.9175	0.91245	PEAKS DB	G220202_009_Slot1-40_1_4100		65	13	45	4.9	C2:Cysteinylation:1000.00	1.82489	0	1.82489	0	6970	12.7669	Raji_S1	Raji	S1	SPIKE_SARS2	+ 2	378	387
Raji_S	Raji_S1_1	Raji_S1_1_2	P0DTC2|SPIKE_SARS2	P0DTC2	SPIKE	SARS2	2	P0DTC2_607.8_2	66371	KCYGVSPTKL_2	KC(+119.00)YGVSPTKL	KCYGVSPTKL	s0378-0387	K	L	Cysteinylation	10	8 to 13 AAs	2	1213.58	607.8	37.03	0.9074	0.9175	0.91245	PEAKS DB	G220202_009_Slot1-40_1_4100		65	13	45	4.9	C2:Cysteinylation:1000.00	1.82489	0	1.82371	0	996.62	9.9609	Raji_S1	Raji	S1	SPIKE_SARS2	+ 2	378	387
Raji_S	Raji_S1_2	Raji_S1_2_2	P0DTC2|SPIKE_SARS2	P0DTC2	SPIKE	SARS2	2	P0DTC2_607.8_2	66371	KCYGVSPTKL_2	KC(+119.00)YGVSPTKL	KCYGVSPTKL	s0378-0387	K	L	Cysteinylation	10	8 to 13 AAs	2	1213.58	607.8	37.03	0.9074	0.9175	0.91245	PEAKS DB	G220202_009_Slot1-40_1_4100		65	13	45	4.9	C2:Cysteinylation:1000.00	1.82489	0	1.74843	0	5163.6	12.3342	Raji_S1	Raji	S1	SPIKE_SARS2	+ 2	378	387
Raji_S	Raji_S1_1	Raji_S1_1_3	P0DTC2|SPIKE_SARS2	P0DTC2	SPIKE	SARS2	3	P0DTC2_607.8_2	66371	KCYGVSPTKL_2	KC(+119.00)YGVSPTKL	KCYGVSPTKL	s0378-0387	K	L	Cysteinylation	10	8 to 13 AAs	2	1213.58	607.8	37.03	0.9074	0.9175	0.91245	PEAKS DB	G220202_009_Slot1-40_1_4100		65	13	45	4.9	C2:Cysteinylation:1000.00	1.82489	0	1.442	5.96454e-05	463.48	8.85636	Raji_S1	Raji	S1	SPIKE_SARS2	+ 2	378	387
Raji_S	Raji_S1_2	Raji_S1_2_3	P0DTC2|SPIKE_SARS2	P0DTC2	SPIKE	SARS2	3	P0DTC2_607.8_2	66371	KCYGVSPTKL_2	KC(+119.00)YGVSPTKL	KCYGVSPTKL	s0378-0387	K	L	Cysteinylation	10	8 to 13 AAs	2	1213.58	607.8	37.03	0.9074	0.9175	0.91245	PEAKS DB	G220202_009_Slot1-40_1_4100		65	13	45	4.9	C2:Cysteinylation:1000.00	1.82489	0	1.55126	0	6172	12.5915	Raji_S1	Raji	S1	SPIKE_SARS2	+ 2	378	387
Raji_S	Raji_S1_2	Raji_S1_2_1	P0DTC2|SPIKE_SARS2	P0DTC2	SPIKE	SARS2	1	P0DTC2_628.8_2	89712	KCYGVSPTKL_2	K(+42.01)C(+119.00)YGVSPTKL	KCYGVSPTKL	s0378-0387	K	L	Acetylation (N-term); Cysteinylation	10	8 to 13 AAs	2	1255.59	628.803	46.98	0.9304	0.9405	0.93545	PEAKS DB	G220202_009_Slot1-40_1_4100		65	1	26.86	1.3	K1:Acetylation (N-term):1000.00;C2:Cysteinylation:1000.00	1.82489	0	1.82489	0	222.63	7.7985	Raji_S1	Raji	S1	SPIKE_SARS2	+ 2	378	387
Raji_S	Raji_S1_1	Raji_S1_1_1	P0DTC2|SPIKE_SARS2	P0DTC2	SPIKE	SARS2	1	P0DTC2_682.4_2	107264	VLYNSASFSTFK_2	VLYNSASFSTFK	VLYNSASFSTFK	s0367-0378	V	K	None	12	8 to 13 AAs	2	1362.68	682.351	80.67	0.9668	0.9768	0.9718	PEAKS DB	G220222_026_Slot1-43_1_4264		65	18	55.78	4.3		2.87799	0	2.0036	0	6534.7	12.6739	Raji_S1	Raji	S1	SPIKE_SARS2	+ 2	367	378
Raji_S	Raji_S1_1	Raji_S1_1_2	P0DTC2|SPIKE_SARS2	P0DTC2	SPIKE	SARS2	2	P0DTC2_682.4_2	107264	VLYNSASFSTFK_2	VLYNSASFSTFK	VLYNSASFSTFK	s0367-0378	V	K	None	12	8 to 13 AAs	2	1362.68	682.351	80.67	0.9668	0.9768	0.9718	PEAKS DB	G220222_026_Slot1-43_1_4264		65	18	55.78	4.3		2.87799	0	2.57845	0	23832	14.5406	Raji_S1	Raji	S1	SPIKE_SARS2	+ 2	367	378
Raji_S	Raji_S1_2	Raji_S1_2_2	P0DTC2|SPIKE_SARS2	P0DTC2	SPIKE	SARS2	2	P0DTC2_682.4_2	107264	VLYNSASFSTFK_2	VLYNSASFSTFK	VLYNSASFSTFK	s0367-0378	V	K	None	12	8 to 13 AAs	2	1362.68	682.351	80.67	0.9668	0.9768	0.9718	PEAKS DB	G220222_026_Slot1-43_1_4264		65	18	55.78	4.3		2.87799	0	2.87799	0	47632	15.5396	Raji_S1	Raji	S1	SPIKE_SARS2	+ 2	367	378
Raji_S	Raji_S1_1	Raji_S1_1_3	P0DTC2|SPIKE_SARS2	P0DTC2	SPIKE	SARS2	3	P0DTC2_682.4_2	107264	VLYNSASFSTFK_2	VLYNSASFSTFK	VLYNSASFSTFK	s0367-0378	V	K	None	12	8 to 13 AAs	2	1362.68	682.351	80.67	0.9668	0.9768	0.9718	PEAKS DB	G220222_026_Slot1-43_1_4264		65	18	55.78	4.3		2.87799	0	2.20657	0	20196	14.3018	Raji_S1	Raji	S1	SPIKE_SARS2	+ 2	367	378
Raji_S	Raji_S1_2	Raji_S1_2_3	P0DTC2|SPIKE_SARS2	P0DTC2	SPIKE	SARS2	3	P0DTC2_682.4_2	107264	VLYNSASFSTFK_2	VLYNSASFSTFK	VLYNSASFSTFK	s0367-0378	V	K	None	12	8 to 13 AAs	2	1362.68	682.351	80.67	0.9668	0.9768	0.9718	PEAKS DB	G220222_026_Slot1-43_1_4264		65	18	55.78	4.3		2.87799	0	2.50402	0	45964	15.4882	Raji_S1	Raji	S1	SPIKE_SARS2	+ 2	367	378
JY_S	JY_S2_2	JY_S2_2_1	P0DTC2|SPIKE_SARS2	P0DTC2	SPIKE	SARS2	1	P0DTC2_839.5_1	144306	APHGVVFL_1	APHGVVFL	APHGVVFL	s1056-1063	A	L	None	8	8 to 13 AAs	1	838.47	839.474	103.36	1.3517	1.3617	1.3567	PEAKS DB	G220215_018_Slot1-32_1_4186		23	2	36.31	-4.2		1.33864	0.00031263	1.33864	0.000230791	2850.7	11.4771	JY_S2	JY	S2	SPIKE_SARS2	+ 1	1056	1063
JY_S	JY_S2_2	JY_S2_2_2	P0DTC2|SPIKE_SARS2	P0DTC2	SPIKE	SARS2	2	P0DTC2_839.5_1	144306	APHGVVFL_1	APHGVVFL	APHGVVFL	s1056-1063	A	L	None	8	8 to 13 AAs	1	838.47	839.474	103.36	1.3517	1.3617	1.3567	PEAKS DB	G220215_018_Slot1-32_1_4186		23	2	36.31	-4.2		1.33864	0.00031263	0.74642	0.00132781	982.03	9.93962	JY_S2	JY	S2	SPIKE_SARS2	+ 1	1056	1063
Raji_S	Raji_S1_1	Raji_S1_1_1	P0DTC2|SPIKE_SARS2	P0DTC2	SPIKE	SARS2	1	P0DTC2_874.4_1	133386	SASFSTFK_1	SASFSTFK	SASFSTFK	s0371-0378	S	K	None	8	8 to 13 AAs	1	873.423	874.424	66.23	1.3793	1.3893	1.3843	PEAKS DB	G220202_009_Slot1-40_1_4100		65	2	33.33	-3.8		0.964275	0.00165581	0.346005	0.0060837	640.69	9.32348	Raji_S1	Raji	S1	SPIKE_SARS2	+ 1	371	378
Raji_S	Raji_S1_2	Raji_S1_2_1	P0DTC2|SPIKE_SARS2	P0DTC2	SPIKE	SARS2	1	P0DTC2_874.4_1	133386	SASFSTFK_1	SASFSTFK	SASFSTFK	s0371-0378	S	K	None	8	8 to 13 AAs	1	873.423	874.424	66.23	1.3793	1.3893	1.3843	PEAKS DB	G220202_009_Slot1-40_1_4100		65	2	33.33	-3.8		0.964275	0.00165581	0.964275	0.000571371	4591.2	12.1647	Raji_S1	Raji	S1	SPIKE_SARS2	+ 1	371	378
Raji_S	Raji_S2_2	Raji_S2_2_1	P0DTC2|SPIKE_SARS2	P0DTC2	SPIKE	SARS2	1	P0DTC2_935.5_1	34150	TYVPAQEK_1	TYVPAQEK	TYVPAQEK	s1066-1073	T	K	None	8	8 to 13 AAs	1	934.476	935.475	21.49	1.4113	1.4212	1.41625	PEAKS DB	G220202_014_Slot1-39_1_4105		65	1	33.61	-6.2		1.39718	0.000151492	1.39718	0.000119899	638.44	9.31841	Raji_S2	Raji	S2	SPIKE_SARS2	+ 1	1066	1073
Raji_S	Raji_S1_1	Raji_S1_1_1	P0DTC2|SPIKE_SARS2	P0DTC2	SPIKE	SARS2	1	P0DTC2_988.5_1	133254	NSASFSTFK_1	NSASFSTFK	NSASFSTFK	s0370-0378	N	K	None	9	8 to 13 AAs	1	987.466	988.468	66.23	1.4798	1.4898	1.4848	PEAKS DB	G220202_009_Slot1-40_1_4100		65	2	43	-2.3		1.44478	8.71232e-05	1.20399	0.000228522	521.07	9.02533	Raji_S1	Raji	S1	SPIKE_SARS2	+ 1	370	378
Raji_S	Raji_S1_2	Raji_S1_2_1	P0DTC2|SPIKE_SARS2	P0DTC2	SPIKE	SARS2	1	P0DTC2_988.5_1	133254	NSASFSTFK_1	NSASFSTFK	NSASFSTFK	s0370-0378	N	K	None	9	8 to 13 AAs	1	987.466	988.468	66.23	1.4798	1.4898	1.4848	PEAKS DB	G220202_009_Slot1-40_1_4100		65	2	43	-2.3		1.44478	8.71232e-05	1.44478	5.96454e-05	4674.5	12.1906	Raji_S1	Raji	S1	SPIKE_SARS2	+ 1	370	378
JY_S	JY_S2_1	JY_S2_1_1	P0DTC2|SPIKE_SARS2	P0DTC2	SPIKE	SARS2	1	P0DTC2_991.5_1	129642	IPTNFTISV_1	IPTNFTISV	IPTNFTISV	s0714-0722	I	V	None	9	8 to 13 AAs	1	990.539	991.544	99.81	1.4906	1.5006	1.4956	PEAKS DB	G220215_030_Slot1-31_1_4198		23	2	22.47	-1.8		0.607769	0.00616349	-0.0805805	0.0290759	0		JY_S2	JY	S2	SPIKE_SARS2	+ 1	714	722
JY_S	JY_S2_1	JY_S2_1_2	P0DTC2|SPIKE_SARS2	P0DTC2	SPIKE	SARS2	2	P0DTC2_991.5_1	129642	IPTNFTISV_1	IPTNFTISV	IPTNFTISV	s0714-0722	I	V	None	9	8 to 13 AAs	1	990.539	991.544	99.81	1.4906	1.5006	1.4956	PEAKS DB	G220215_030_Slot1-31_1_4198		23	2	22.47	-1.8		0.607769	0.00616349	0.607769	0.00222697	338.44	8.40276	JY_S2	JY	S2	SPIKE_SARS2	+ 1	714	722
JY_S	JY_S2_2	JY_S2_2_2	P0DTC2|SPIKE_SARS2	P0DTC2	SPIKE	SARS2	2	P0DTC2_991.5_1	129642	IPTNFTISV_1	IPTNFTISV	IPTNFTISV	s0714-0722	I	V	None	9	8 to 13 AAs	1	990.539	991.544	99.81	1.4906	1.5006	1.4956	PEAKS DB	G220215_030_Slot1-31_1_4198		23	2	22.47	-1.8		0.607769	0.00616349	0.569249	0.00265774	0		JY_S2	JY	S2	SPIKE_SARS2	+ 1	714	722
JY_S	JY_S2_1	JY_S2_1_3	P0DTC2|SPIKE_SARS2	P0DTC2	SPIKE	SARS2	3	P0DTC2_991.5_1	129642	IPTNFTISV_1	IPTNFTISV	IPTNFTISV	s0714-0722	I	V	None	9	8 to 13 AAs	1	990.539	991.544	99.81	1.4906	1.5006	1.4956	PEAKS DB	G220215_030_Slot1-31_1_4198		23	2	22.47	-1.8		0.607769	0.00616349	0.116824	0.0141956	357.69	8.48257	JY_S2	JY	S2	SPIKE_SARS2	+ 1	714	722
JY_S	JY_S2_2	JY_S2_2_3	P0DTC2|SPIKE_SARS2	P0DTC2	SPIKE	SARS2	3	P0DTC2_991.5_1	129642	IPTNFTISV_1	IPTNFTISV	IPTNFTISV	s0714-0722	I	V	None	9	8 to 13 AAs	1	990.539	991.544	99.81	1.4906	1.5006	1.4956	PEAKS DB	G220215_030_Slot1-31_1_4198		23	2	22.47	-1.8		0.607769	0.00616349	0.118551	0.0140892	0		JY_S2	JY	S2	SPIKE_SARS2	+ 1	714	722
Raji_S	Raji_S2_1	Raji_S2_1_1	P0DTC2|SPIKE_SARS2	P0DTC2	SPIKE	SARS2	1	P0DTC2_998.5_1	195160	SIIAYTMSL_1	SIIAYTMSL	SIIAYTMSL	s0691-0699	S	L	None	9	8 to 13 AAs	1	997.515	998.518	95.85	1.5037	1.5136	1.50865	PEAKS DB	G220202_014_Slot1-39_1_4105		65	7	47.68	-2.2		1.82375	0	1.35412	0.000126406	4783.4	12.2238	Raji_S2	Raji	S2	SPIKE_SARS2	+ 1	691	699
Raji_S	Raji_S2_2	Raji_S2_2_1	P0DTC2|SPIKE_SARS2	P0DTC2	SPIKE	SARS2	1	P0DTC2_998.5_1	195160	SIIAYTMSL_1	SIIAYTMSL	SIIAYTMSL	s0691-0699	S	L	None	9	8 to 13 AAs	1	997.515	998.518	95.85	1.5037	1.5136	1.50865	PEAKS DB	G220202_014_Slot1-39_1_4105		65	7	47.68	-2.2		1.82375	0	1.69027	0	12499	13.6095	Raji_S2	Raji	S2	SPIKE_SARS2	+ 1	691	699
Raji_S	Raji_S2_1	Raji_S2_1_2	P0DTC2|SPIKE_SARS2	P0DTC2	SPIKE	SARS2	2	P0DTC2_998.5_1	195160	SIIAYTMSL_1	SIIAYTMSL	SIIAYTMSL	s0691-0699	S	L	None	9	8 to 13 AAs	1	997.515	998.518	95.85	1.5037	1.5136	1.50865	PEAKS DB	G220202_014_Slot1-39_1_4105		65	7	47.68	-2.2		1.82375	0	1.67369	0	2096.9	11.034	Raji_S2	Raji	S2	SPIKE_SARS2	+ 1	691	699
Raji_S	Raji_S2_2	Raji_S2_2_2	P0DTC2|SPIKE_SARS2	P0DTC2	SPIKE	SARS2	2	P0DTC2_998.5_1	195160	SIIAYTMSL_1	SIIAYTMSL	SIIAYTMSL	s0691-0699	S	L	None	9	8 to 13 AAs	1	997.515	998.518	95.85	1.5037	1.5136	1.50865	PEAKS DB	G220202_014_Slot1-39_1_4105		65	7	47.68	-2.2		1.82375	0	1.80965	0	5339.2	12.3824	Raji_S2	Raji	S2	SPIKE_SARS2	+ 1	691	699
Raji_S	Raji_S2_1	Raji_S2_1_3	P0DTC2|SPIKE_SARS2	P0DTC2	SPIKE	SARS2	3	P0DTC2_998.5_1	195160	SIIAYTMSL_1	SIIAYTMSL	SIIAYTMSL	s0691-0699	S	L	None	9	8 to 13 AAs	1	997.515	998.518	95.85	1.5037	1.5136	1.50865	PEAKS DB	G220202_014_Slot1-39_1_4105		65	7	47.68	-2.2		1.82375	0	1.74733	0	5304.1	12.3729	Raji_S2	Raji	S2	SPIKE_SARS2	+ 1	691	699
Raji_S	Raji_S2_2	Raji_S2_2_3	P0DTC2|SPIKE_SARS2	P0DTC2	SPIKE	SARS2	3	P0DTC2_998.5_1	195160	SIIAYTMSL_1	SIIAYTMSL	SIIAYTMSL	s0691-0699	S	L	None	9	8 to 13 AAs	1	997.515	998.518	95.85	1.5037	1.5136	1.50865	PEAKS DB	G220202_014_Slot1-39_1_4105		65	7	47.68	-2.2		1.82375	0	1.82375	0	6702.3	12.7104	Raji_S2	Raji	S2	SPIKE_SARS2	+ 1	691	699
JY_S	JY_S2_1	JY_S2_1_1	P0DTC2|SPIKE_SARS2	P0DTC2	SPIKE	SARS2	1	P0DTC2_998.5_1	140819	SIIAYTMSL_1	SIIAYTMSL	SIIAYTMSL	s0691-0699	S	L	None	9	8 to 13 AAs	1	997.515	998.519	107.52	1.5134	1.5234	1.5184	PEAKS DB	G220215_017_Slot1-31_1_4185		23	5	39.38	0.6		1.41633	0.000228728	1.41633	0.000184264	199.77	7.6422	JY_S2	JY	S2	SPIKE_SARS2	+ 1	691	699
JY_S	JY_S2_2	JY_S2_2_1	P0DTC2|SPIKE_SARS2	P0DTC2	SPIKE	SARS2	1	P0DTC2_998.5_1	140819	SIIAYTMSL_1	SIIAYTMSL	SIIAYTMSL	s0691-0699	S	L	None	9	8 to 13 AAs	1	997.515	998.519	107.52	1.5134	1.5234	1.5184	PEAKS DB	G220215_017_Slot1-31_1_4185		23	5	39.38	0.6		1.41633	0.000228728	1.17602	0.000338493	1267.2	10.3074	JY_S2	JY	S2	SPIKE_SARS2	+ 1	691	699
JY_S	JY_S2_1	JY_S2_1_2	P0DTC2|SPIKE_SARS2	P0DTC2	SPIKE	SARS2	2	P0DTC2_998.5_1	140819	SIIAYTMSL_1	SIIAYTMSL	SIIAYTMSL	s0691-0699	S	L	None	9	8 to 13 AAs	1	997.515	998.519	107.52	1.5134	1.5234	1.5184	PEAKS DB	G220215_017_Slot1-31_1_4185		23	5	39.38	0.6		1.41633	0.000228728	1.26681	0.000283051	266.56	8.05832	JY_S2	JY	S2	SPIKE_SARS2	+ 1	691	699
JY_S	JY_S2_1	JY_S2_1_3	P0DTC2|SPIKE_SARS2	P0DTC2	SPIKE	SARS2	3	P0DTC2_998.5_1	140819	SIIAYTMSL_1	SIIAYTMSL	SIIAYTMSL	s0691-0699	S	L	None	9	8 to 13 AAs	1	997.515	998.519	107.52	1.5134	1.5234	1.5184	PEAKS DB	G220215_017_Slot1-31_1_4185		23	5	39.38	0.6		1.41633	0.000228728	1.34102	0.000230791	758.11	9.56626	JY_S2	JY	S2	SPIKE_SARS2	+ 1	691	699
JY_S	JY_S2_2	JY_S2_2_3	P0DTC2|SPIKE_SARS2	P0DTC2	SPIKE	SARS2	3	P0DTC2_998.5_1	140819	SIIAYTMSL_1	SIIAYTMSL	SIIAYTMSL	s0691-0699	S	L	None	9	8 to 13 AAs	1	997.515	998.519	107.52	1.5134	1.5234	1.5184	PEAKS DB	G220215_017_Slot1-31_1_4185		23	5	39.38	0.6		1.41633	0.000228728	0.874944	0.000868699	1069.1	10.0622	JY_S2	JY	S2	SPIKE_SARS2	+ 1	691	699
Raji_S	Raji_S1_1	Raji_S1_1_1	P0DTC2|SPIKE_SARS2	P0DTC2	SPIKE	SARS2	1	P0DTC2_1001.5_1	51516	GVYFASTEK_1	GVYFASTEK	GVYFASTEK	s0089-0097	G	K	None	9	8 to 13 AAs	1	1000.49	1001.49	30.41	1.5136	1.5236	1.5186	PEAKS DB	G220202_009_Slot1-40_1_4100		65	4	37.84	-0.4		1.29187	0.000291503	0.21541	0.0102704	0		Raji_S1	Raji	S1	SPIKE_SARS2	+ 1	89	97
Raji_S	Raji_S1_2	Raji_S1_2_1	P0DTC2|SPIKE_SARS2	P0DTC2	SPIKE	SARS2	1	P0DTC2_1001.5_1	51516	GVYFASTEK_1	GVYFASTEK	GVYFASTEK	s0089-0097	G	K	None	9	8 to 13 AAs	1	1000.49	1001.49	30.41	1.5136	1.5236	1.5186	PEAKS DB	G220202_009_Slot1-40_1_4100		65	4	37.84	-0.4		1.29187	0.000291503	1.29187	0.00014474	226.51	7.82343	Raji_S1	Raji	S1	SPIKE_SARS2	+ 1	89	97
Raji_S	Raji_S1_1	Raji_S1_1_2	P0DTC2|SPIKE_SARS2	P0DTC2	SPIKE	SARS2	2	P0DTC2_1001.5_1	51516	GVYFASTEK_1	GVYFASTEK	GVYFASTEK	s0089-0097	G	K	None	9	8 to 13 AAs	1	1000.49	1001.49	30.41	1.5136	1.5236	1.5186	PEAKS DB	G220202_009_Slot1-40_1_4100		65	4	37.84	-0.4		1.29187	0.000291503	0.910679	0.000732945	879.59	9.78069	Raji_S1	Raji	S1	SPIKE_SARS2	+ 1	89	97
Raji_S	Raji_S1_1	Raji_S1_1_3	P0DTC2|SPIKE_SARS2	P0DTC2	SPIKE	SARS2	3	P0DTC2_1001.5_1	51516	GVYFASTEK_1	GVYFASTEK	GVYFASTEK	s0089-0097	G	K	None	9	8 to 13 AAs	1	1000.49	1001.49	30.41	1.5136	1.5236	1.5186	PEAKS DB	G220202_009_Slot1-40_1_4100		65	4	37.84	-0.4		1.29187	0.000291503	0.94753	0.000602057	1587.9	10.6329	Raji_S1	Raji	S1	SPIKE_SARS2	+ 1	89	97
Raji_S	Raji_S1_2	Raji_S1_2_3	P0DTC2|SPIKE_SARS2	P0DTC2	SPIKE	SARS2	3	P0DTC2_1001.5_1	51516	GVYFASTEK_1	GVYFASTEK	GVYFASTEK	s0089-0097	G	K	None	9	8 to 13 AAs	1	1000.49	1001.49	30.41	1.5136	1.5236	1.5186	PEAKS DB	G220202_009_Slot1-40_1_4100		65	4	37.84	-0.4		1.29187	0.000291503	0.546642	0.00278143	2668.4	11.3818	Raji_S1	Raji	S1	SPIKE_SARS2	+ 1	89	97
Raji_S	Raji_S2_1	Raji_S2_1_1	P0DTC2|SPIKE_SARS2	P0DTC2	SPIKE	SARS2	1	P0DTC2_1014.5_1	121199	SIIAYTMSL_1	SIIAYTM(+15.99)SL	SIIAYTMSL	s0691-0699	S	L	Oxidation (M)	9	8 to 13 AAs	1	1013.51	1014.52	101.4	1.539	1.5491	1.54405	PEAKS DB	G220222_032_Slot1-42_1_4270		65	6	48.18	-2.6	M7:Oxidation (M):1000.00	1.82375	0	1.35412	0.000126406	151.16	7.23993	Raji_S2	Raji	S2	SPIKE_SARS2	+ 1	691	699
Raji_S	Raji_S2_2	Raji_S2_2_1	P0DTC2|SPIKE_SARS2	P0DTC2	SPIKE	SARS2	1	P0DTC2_1014.5_1	121199	SIIAYTMSL_1	SIIAYTM(+15.99)SL	SIIAYTMSL	s0691-0699	S	L	Oxidation (M)	9	8 to 13 AAs	1	1013.51	1014.52	101.4	1.539	1.5491	1.54405	PEAKS DB	G220222_032_Slot1-42_1_4270		65	6	48.18	-2.6	M7:Oxidation (M):1000.00	1.82375	0	1.69027	0	5235.1	12.354	Raji_S2	Raji	S2	SPIKE_SARS2	+ 1	691	699
Raji_S	Raji_S2_1	Raji_S2_1_2	P0DTC2|SPIKE_SARS2	P0DTC2	SPIKE	SARS2	2	P0DTC2_1014.5_1	121199	SIIAYTMSL_1	SIIAYTM(+15.99)SL	SIIAYTMSL	s0691-0699	S	L	Oxidation (M)	9	8 to 13 AAs	1	1013.51	1014.52	101.4	1.539	1.5491	1.54405	PEAKS DB	G220222_032_Slot1-42_1_4270		65	6	48.18	-2.6	M7:Oxidation (M):1000.00	1.82375	0	1.67369	0	1059.5	10.0492	Raji_S2	Raji	S2	SPIKE_SARS2	+ 1	691	699
Raji_S	Raji_S2_2	Raji_S2_2_2	P0DTC2|SPIKE_SARS2	P0DTC2	SPIKE	SARS2	2	P0DTC2_1014.5_1	121199	SIIAYTMSL_1	SIIAYTM(+15.99)SL	SIIAYTMSL	s0691-0699	S	L	Oxidation (M)	9	8 to 13 AAs	1	1013.51	1014.52	101.4	1.539	1.5491	1.54405	PEAKS DB	G220222_032_Slot1-42_1_4270		65	6	48.18	-2.6	M7:Oxidation (M):1000.00	1.82375	0	1.80965	0	7036.2	12.7806	Raji_S2	Raji	S2	SPIKE_SARS2	+ 1	691	699
Raji_S	Raji_S2_1	Raji_S2_1_3	P0DTC2|SPIKE_SARS2	P0DTC2	SPIKE	SARS2	3	P0DTC2_1014.5_1	121199	SIIAYTMSL_1	SIIAYTM(+15.99)SL	SIIAYTMSL	s0691-0699	S	L	Oxidation (M)	9	8 to 13 AAs	1	1013.51	1014.52	101.4	1.539	1.5491	1.54405	PEAKS DB	G220222_032_Slot1-42_1_4270		65	6	48.18	-2.6	M7:Oxidation (M):1000.00	1.82375	0	1.74733	0	1411.9	10.4634	Raji_S2	Raji	S2	SPIKE_SARS2	+ 1	691	699
Raji_S	Raji_S2_2	Raji_S2_2_3	P0DTC2|SPIKE_SARS2	P0DTC2	SPIKE	SARS2	3	P0DTC2_1014.5_1	121199	SIIAYTMSL_1	SIIAYTM(+15.99)SL	SIIAYTMSL	s0691-0699	S	L	Oxidation (M)	9	8 to 13 AAs	1	1013.51	1014.52	101.4	1.539	1.5491	1.54405	PEAKS DB	G220222_032_Slot1-42_1_4270		65	6	48.18	-2.6	M7:Oxidation (M):1000.00	1.82375	0	1.82375	0	6727.9	12.7159	Raji_S2	Raji	S2	SPIKE_SARS2	+ 1	691	699
JY_S	JY_S2_1	JY_S2_1_2	P0DTC2|SPIKE_SARS2	P0DTC2	SPIKE	SARS2	2	P0DTC2_1014.5_1	118692	SIIAYTMSL_1	SIIAYTM(+15.99)SL	SIIAYTMSL	s0691-0699	S	L	Oxidation (M)	9	8 to 13 AAs	1	1013.51	1014.52	89.58	1.5426	1.5526	1.5476	PEAKS DB	G220215_043_Slot1-31_1_4211		23	3	39.46	1.9	M7:Oxidation (M):1000.00	1.41633	0.000228728	1.26681	0.000283051	649.68	9.34359	JY_S2	JY	S2	SPIKE_SARS2	+ 1	691	699
JY_S	JY_S2_2	JY_S2_2_2	P0DTC2|SPIKE_SARS2	P0DTC2	SPIKE	SARS2	2	P0DTC2_1014.5_1	118692	SIIAYTMSL_1	SIIAYTM(+15.99)SL	SIIAYTMSL	s0691-0699	S	L	Oxidation (M)	9	8 to 13 AAs	1	1013.51	1014.52	89.58	1.5426	1.5526	1.5476	PEAKS DB	G220215_043_Slot1-31_1_4211		23	3	39.46	1.9	M7:Oxidation (M):1000.00	1.41633	0.000228728	1.24281	0.000284562	270.94	8.08183	JY_S2	JY	S2	SPIKE_SARS2	+ 1	691	699
JY_S	JY_S2_1	JY_S2_1_3	P0DTC2|SPIKE_SARS2	P0DTC2	SPIKE	SARS2	3	P0DTC2_1014.5_1	118692	SIIAYTMSL_1	SIIAYTM(+15.99)SL	SIIAYTMSL	s0691-0699	S	L	Oxidation (M)	9	8 to 13 AAs	1	1013.51	1014.52	89.58	1.5426	1.5526	1.5476	PEAKS DB	G220215_043_Slot1-31_1_4211		23	3	39.46	1.9	M7:Oxidation (M):1000.00	1.41633	0.000228728	1.34102	0.000230791	624.11	9.28566	JY_S2	JY	S2	SPIKE_SARS2	+ 1	691	699
Raji_S	Raji_S2_2	Raji_S2_2_2	P0DTC2|SPIKE_SARS2	P0DTC2	SPIKE	SARS2	2	P0DTC2_1045.5_1	115610	PLQPELDSF_1	PLQPELDSF	PLQPELDSF	s1140-1148	P	F	None	9	8 to 13 AAs	1	1044.51	1045.52	96.77	1.5455	1.5556	1.55055	PEAKS DB	G220222_049_Slot1-42_1_4287		65	1	23.96	-2.3		0.588203	0.00760985	0.495026	0.0034227	191.81	7.58353	Raji_S2	Raji	S2	SPIKE_SARS2	+ 1	1140	1148
Raji_S	Raji_S2_2	Raji_S2_2_3	P0DTC2|SPIKE_SARS2	P0DTC2	SPIKE	SARS2	3	P0DTC2_1045.5_1	115610	PLQPELDSF_1	PLQPELDSF	PLQPELDSF	s1140-1148	P	F	None	9	8 to 13 AAs	1	1044.51	1045.52	96.77	1.5455	1.5556	1.55055	PEAKS DB	G220222_049_Slot1-42_1_4287		65	1	23.96	-2.3		0.588203	0.00760985	0.588203	0.00244179	0		Raji_S2	Raji	S2	SPIKE_SARS2	+ 1	1140	1148
Raji_S	Raji_S2_1	Raji_S2_1_1	P0DTC2|SPIKE_SARS2	P0DTC2	SPIKE	SARS2	1	P0DTC2_1073.6_1	118228	VYDPLQPEL_1	VYDPLQPEL	VYDPLQPEL	s1137-1145	V	L	None	9	8 to 13 AAs	1	1072.54	1073.55	98.26	1.6035	1.6137	1.6086	PEAKS DB	G220222_049_Slot1-42_1_4287		65	8	40.41	-0.5		1.47612	8.71232e-05	1.0067	0.00049982	6994.3	12.772	Raji_S2	Raji	S2	SPIKE_SARS2	+ 1	1137	1145
Raji_S	Raji_S2_2	Raji_S2_2_1	P0DTC2|SPIKE_SARS2	P0DTC2	SPIKE	SARS2	1	P0DTC2_1073.6_1	118228	VYDPLQPEL_1	VYDPLQPEL	VYDPLQPEL	s1137-1145	V	L	None	9	8 to 13 AAs	1	1072.54	1073.55	98.26	1.6035	1.6137	1.6086	PEAKS DB	G220222_049_Slot1-42_1_4287		65	8	40.41	-0.5		1.47612	8.71232e-05	1.22904	0.000179503	19541	14.2542	Raji_S2	Raji	S2	SPIKE_SARS2	+ 1	1137	1145
Raji_S	Raji_S2_1	Raji_S2_1_2	P0DTC2|SPIKE_SARS2	P0DTC2	SPIKE	SARS2	2	P0DTC2_1073.6_1	118228	VYDPLQPEL_1	VYDPLQPEL	VYDPLQPEL	s1137-1145	V	L	None	9	8 to 13 AAs	1	1072.54	1073.55	98.26	1.6035	1.6137	1.6086	PEAKS DB	G220222_049_Slot1-42_1_4287		65	8	40.41	-0.5		1.47612	8.71232e-05	1.45609	5.96454e-05	6961	12.7651	Raji_S2	Raji	S2	SPIKE_SARS2	+ 1	1137	1145
Raji_S	Raji_S2_2	Raji_S2_2_2	P0DTC2|SPIKE_SARS2	P0DTC2	SPIKE	SARS2	2	P0DTC2_1073.6_1	118228	VYDPLQPEL_1	VYDPLQPEL	VYDPLQPEL	s1137-1145	V	L	None	9	8 to 13 AAs	1	1072.54	1073.55	98.26	1.6035	1.6137	1.6086	PEAKS DB	G220222_049_Slot1-42_1_4287		65	8	40.41	-0.5		1.47612	8.71232e-05	1.30558	0.00013441	25111	14.616	Raji_S2	Raji	S2	SPIKE_SARS2	+ 1	1137	1145
Raji_S	Raji_S2_1	Raji_S2_1_3	P0DTC2|SPIKE_SARS2	P0DTC2	SPIKE	SARS2	3	P0DTC2_1073.6_1	118228	VYDPLQPEL_1	VYDPLQPEL	VYDPLQPEL	s1137-1145	V	L	None	9	8 to 13 AAs	1	1072.54	1073.55	98.26	1.6035	1.6137	1.6086	PEAKS DB	G220222_049_Slot1-42_1_4287		65	8	40.41	-0.5		1.47612	8.71232e-05	1.43252	9.85513e-05	9885.2	13.2711	Raji_S2	Raji	S2	SPIKE_SARS2	+ 1	1137	1145
Raji_S	Raji_S2_2	Raji_S2_2_3	P0DTC2|SPIKE_SARS2	P0DTC2	SPIKE	SARS2	3	P0DTC2_1073.6_1	118228	VYDPLQPEL_1	VYDPLQPEL	VYDPLQPEL	s1137-1145	V	L	None	9	8 to 13 AAs	1	1072.54	1073.55	98.26	1.6035	1.6137	1.6086	PEAKS DB	G220222_049_Slot1-42_1_4287		65	8	40.41	-0.5		1.47612	8.71232e-05	1.47612	4.64023e-05	20678	14.3358	Raji_S2	Raji	S2	SPIKE_SARS2	+ 1	1137	1145
Raji_S	Raji_S1_2	Raji_S1_2_1	P0DTC2|SPIKE_SARS2	P0DTC2	SPIKE	SARS2	1	P0DTC2_1264.6_1	133499	LYNSASFSTFK_1	LYNSASFSTFK	LYNSASFSTFK	s0368-0378	L	K	None	11	8 to 13 AAs	1	1263.61	1264.61	66.2	1.7232	1.7331	1.72815	PEAKS DB	G220202_009_Slot1-40_1_4100		65	1	30.66	-1.9		0.311099	0.0215782	0.311099	0.00698227	48.403	5.59702	Raji_S1	Raji	S1	SPIKE_SARS2	+ 1	368	378

## Sheet: iedb
iedb_Epitope.ID	Sequence	iedb_Mapped.Start.Position	iedb_Mapped.End.Position	iedb_Identity	iedb_Subjects.Tested	iedb_Subjects.Responded	iedb_Assays.Positive	iedb_Assays.Negative	iedb_Response.Freq.	iedb_Lower.Bound.of.95..CI	iedb_Upper.Bound.of.95..CI
1071428	MFVFLVLLPLVSSQC	1	15	100%	161	9	3	7	0.06	0.03	0.1
1087636	MFVFLVLLPLVSSQCVNL	1	18	100%	52	0	0	3	0	0	0.07
1332785	MFVFLVLLPLVSS	1	13	100%	30	24	1	0	0.8	0.64	0.91
1597759	MFVFLVLLPLVSSQCV	1	16	100%	50	0	0	3	0	0	0.06
1393926	MFVFLVLLPLVSSQCVN	1	17	100%	1	0	0	1	0	0	0.94
1392304	MFVFLVLLPLVSSQCVNLTT	1	20	100%	2	1	1	1	0.5	0.02	0.97
1972984	MFVFLVLLPLVS	1	12	100%	17	17	1	0	1	0.84	1
2061065	MFVFLVLLPLVSSQCVNLTTRTQLP	1	25	100%	1	0	0	1	0	0	0.94
2116227	MFVFLVLLPLVSSQCVNLTTRT	1	22	100%	1	1	1	0	1	0.04	1
1332003	FVFLVLLPL	2	10	100%	31	15	2	0	0.48	0.33	0.64
1659241	FVFLVLLPLVSSQCVN	2	17	100%	40	0	0	1	0	0	0.07
1437222	FVFLVLLPLVSS	2	13	100%	1	0	0	1	0	0	0.94
1659240	FVFLVLLPLV	2	11	100%	37	12	3	0	0.32	0.2	0.47
1979368	FVFFVLLPLV	2	11	90%	1	1	1	0	1	0.04	1
1702829	VFLVLLPLVSSQCVNL	3	18	100%	40	0	0	1	0	0	0.07
1523384	VFLVLLPLVSSQ	3	14	100%	1	0	0	1	0	0	0.94
1543075	VFLVLLPLVSSQCVN	3	17	100%	7	0	0	1	0	0	0.33
2134320	VFLVLLPLV	3	11	100%	1	1	1	0	1	0.04	1
2134321	VFLVLWPLV	3	12	88.89%	1	1	1	0	1	0.04	1
1657921	FLVLLPLVSSQCVNLT	4	19	100%	40	0	0	1	0	0	0.07
2134064	FLVLLPLVS	4	12	100%	1	1	1	0	1	0.04	1
2001057	FLVLLPLVSSQCVNL	4	18	100%	36	7	1	0	0.19	0.09	0.33
1313117	LVLLPLVSSQCVNLT	5	19	100%	53	0	0	2	0	0	0.07
1678693	LVLLPLVSSQCVNLTT	5	20	100%	40	0	0	1	0	0	0.07
1310899	VLLPLVSSQCVNLTT	6	20	100%	54	2	2	1	0.04	0.01	0.13
1704273	VLLPLVSSQCVNLTTR	6	21	100%	43	0	0	2	0	0	0.06
1071273	LLPLVSSQCVNLTTR	7	21	100%	44	5	1	2	0.11	0.04	0.22
1676077	LLPLVSSQCVNLTTRT	7	22	100%	40	0	0	1	0	0	0.07
1469334	LLPLVSSQCVNL	7	18	100%	18	8	1	1	0.44	0.24	0.65
1676076	LLPLVSSQCV	7	16	100%	3	0	0	1	0	0	0.61
1321078	LPLVSSQCV	8	16	100%	4	1	1	0	0.25	0.01	0.74
1676946	LPLVSSQCVNLTTRTQ	8	23	100%	20	1	1	0	0.05	0	0.21
1393908	LPLVSSQCVNLTTRTQL	8	24	100%	12	1	1	0	0.08	0	0.33
1613172	LPLVSSQCVNLTTRTQLP	8	25	100%	32	0	0	2	0	0	0.09
1470934	LPLVSSQCVNLT	8	19	100%	1	1	1	0	1	0.04	1
2134347	WPLVSSQCV	8	17	88.89%	1	1	1	0	1	0.04	1
1087684	PLVSSQCVNLTTRTQLPP	9	26	100%	20	0	0	1	0	0	0.13
1313292	PLVSSQCVNLTTRTQ	9	23	100%	53	0	0	2	0	0	0.07
1686020	PLVSSQCVNLTTRTQL	9	24	100%	40	0	0	1	0	0	0.07
1488606	PLVSSQCVNLTT	9	20	100%	1	1	1	0	1	0.04	1
1596145	PLVSSQCVNLTTRTQLPPAYTNSFTRGVYY	9	38	100%	52	52	1	0	1	0.93	1
1678838	LVSSQCVNLTTRTQLP	10	25	100%	40	0	0	1	0	0	0.07
1474585	LVSSQCVNLTTR	10	21	100%	1	0	0	1	0	0	0.94
2001200	LVSSQCVNLTTRTQL	10	24	100%	36	4	1	0	0.11	0.04	0.23
1310923	VSSQCVNLTTRTQLP	11	25	100%	96	2	2	6	0.02	0.01	0.07
1706047	VSSQCVNLTTRTQLPP	11	26	100%	43	0	0	2	0	0	0.06
1392504	VSSQCVNLTTRTQLPPAYTN	11	30	100%	2	1	1	1	0.5	0.02	0.97
1529337	VSSQCVNLTTRT	11	22	100%	1	0	0	1	0	0	0.94
1346804	S12, C15, L18, T19, C136, G142, H146, K147, N149, R246	12	246	100%	14	8	1	0	0.57	0.32	0.79
1695679	SSQCVNLTTRTQLPPA	12	27	100%	40	0	0	1	0	0	0.07
1509429	SSQCVNLTTRTQ	12	23	100%	1	1	1	0	1	0.04	1
1313652	SQCVNLTTRTQLPPA	13	27	100%	89	3	1	2	0.03	0.01	0.09
1588135	SQCVNLTTRTQLPPAYTNSFTRGVY	13	37	100%	2	1	1	1	0.5	0.02	0.97
1695097	SQCVNLTTRTQLPPAY	13	28	100%	40	0	0	1	0	0	0.07
1596865	S13, W152	13	152	100%	30	29	1	0	0.97	0.85	1
1508028	SQCVNLTTRTQL	13	24	100%	18	17	1	1	0.94	0.76	1
1860920	S13, Q14, C15, V16, N17, F18, T19, T76, F140, Y144, Y145, H146, K147, N148, M153, S155, E156, R158, L246, T247, P248	13	251	95.24%	1	1	1	0	1	0.04	1
1309555	QCVNLTTRTQLPPAYTNSFT	14	33	100%	120	3	1	0	0.03	0.01	0.07
1687402	QCVNLTTRTQLPPAYT	14	29	100%	40	0	0	1	0	0	0.07
1346820	Q14, Y144, Y145, H146, K147, F157, G252, D253	14	253	100%	7	7	1	0	1	0.65	1
1347910	Q14, C15, V16, N17, T19, G142, V143, Y144, K147, E156, R158, L244, H245, R246, S247, Y248, L249, T250, P251, G252, S256	14	256	100%	1	1	1	0	1	0.04	1
1347911	Q14, C15, Y144, H146, K147, E154, E156, R158, R246, Y248, L249, T250, P251, D253, S254	14	254	100%	1	1	1	0	1	0.04	1
1347912	Q14, N17, L18, T76, K77, V143	14	143	100%	1	1	1	0	1	0.04	1
1347913	Q14, Y144, H146, K147, N148, N149, W152, M153, E154, E156, F157, R158, R246, Y248, L249, P251, G252, D253	14	253	100%	1	1	1	0	1	0.04	1
1397522	Q14, Y144, Y145, H146, K147, E154, E156, F157, R158, R246, S247, Y248, L249, T250, P251, G252, D253, S254, W258	14	258	100%	1	1	1	0	1	0.04	1
1491678	QCVNLTTRTQLP	14	25	100%	1	0	0	1	0	0	0.94
1491679	QCVNLTTRTQLPPA	14	27	100%	1	0	0	1	0	0	0.94
2134957	Q14, Y144, Y145, H146, K147, M153, F157, R158, R246, Y248, L249, T250, P251, G252, D253, S254	14	254	100%	1	1	1	0	1	0.04	1
2134955	Q14, V16, Y144, K147, R246, Y248, P251, G252, D253	14	253	100%	10	10	1	0	1	0.74	1
2134956	Q14, Y144, Y145, H146, K147, F157, G252, D253	14	253	100%	1	1	1	0	1	0.04	1
1391825	CVNLTTRTQLPPAY	15	28	100%	15	0	0	1	0	0	0.17
1649238	CVNLTTRTQLPPAYTN	15	30	100%	40	0	0	1	0	0	0.07
1393716	CVNLTTRTQLPPAYTNS	15	31	100%	1	0	0	1	0	0	0.94
1599956	CVNLTTRTQLPPAYTNSF	15	32	100%	32	0	0	2	0	0	0.09
1418678	CVNLTTRTQLPP	15	26	100%	1	1	1	0	1	0.04	1
1539777	CVNLTTRTQLPPAYT	15	29	100%	7	0	0	1	0	0	0.33
2060975	CVNLTTRTQLPPAYTNSFTRGVYY	15	38	100%	1	0	0	1	0	0	0.94
2116171	CVNLTTRTQLPPAYTNSFTRGV	15	36	100%	36	4	1	0	0.11	0.04	0.23
1310909	VNLTTRTQLPPAYTN	16	30	100%	123	8	4	2	0.07	0.03	0.12
1346805	V16, N17, F140, G142, V143, Y144, Y145, H146, K147, N148, W152, E154, E156, R158, L244, H245, R246, L249, P251	16	251	100%	9	6	1	0	0.67	0.34	0.9
1346806	V16, N17, T19, Y144, R246, S247, Y248, T250, P251, G252, D253, S254, S255, S256, G257	16	257	100%	1	1	1	0	1	0.04	1
1346807	V16, N17, T20, Y144, Y145, H146, K147, N148, S155, R158, R246, L249, T250, P251, G252, D253	16	253	100%	1	1	1	0	1	0.04	1
1704905	VNLTTRTQLPPAYTNS	16	31	100%	43	0	0	2	0	0	0.06
1527030	VNLTTRTQLPPA	16	27	100%	1	1	1	0	1	0.04	1
1625454	VNLTTRTQLPPAYTNSFT	16	33	100%	20	2	1	0	0.1	0.02	0.27
1625455	VNLTTRTQLPPAYTNSFTRGVYYPDKVFRSSVLHSTQ	16	52	100%	20	6	1	0	0.3	0.14	0.5
1087385	NLTTRTQL	17	24	100%	44	1	1	1	0.02	0	0.1
1087661	NLTTRTQLPPAYTNSFTR	17	34	100%	20	0	0	1	0	0	0.13
1313223	NLTTRTQLPPAYTNS	17	31	100%	53	0	0	2	0	0	0.07
1682775	NLTTRTQLPPAYTNSF	17	32	100%	40	0	0	1	0	0	0.07
1482142	NLTTRTQLPPAY	17	28	100%	1	0	0	1	0	0	0.94
1597771	NLTTRTQLPPAYTNSFTRGVYYPDK	17	41	100%	7	7	1	0	1	0.65	1
1347903	L18, D80, L242, A243, L244, R246	18	246	100%	1	1	1	0	1	0.04	1
1347904	L18, Y144, L242, A243, L244, N501	18	501	100%	1	1	1	0	1	0.04	1
1347905	L18, Y144, L242, A243, L244, R246, E484, N501, A701, T716	18	716	100%	1	1	1	0	1	0.04	1
1678437	LTTRTQLPPAYTNSFT	18	33	100%	40	0	0	1	0	0	0.07
1346814	L18, T20, P26, D138, R190, K417, E484, N501, D614, H655, T1027, V1176	18	1176	100%	92	32	1	0	0.35	0.26	0.45
1392566	L18	18	18	100%	15	1	1	0	0.07	0	0.27
1473798	LTTRTQLPPAYT	18	29	100%	1	1	1	0	1	0.04	1
1597479	L18	18	18	100%	24	12	1	0	0.5	0.32	0.67
1700708	TTRTQLPPAYTNSFTR	19	34	100%	40	0	0	1	0	0	0.07
1519725	TTRTQLPPAYTN	19	30	100%	18	2	2	0	0.11	0.02	0.3
1542941	TTRTQLPPAYTNSFT	19	33	100%	43	0	0	2	0	0	0.06
1700707	TTRTQLPPA	19	27	100%	3	0	0	1	0	0	0.61
1334061	TRTQLPPAY	20	28	100%	5	1	1	0	0.2	0.01	0.64
1700108	TRTQLPPAYTNSFTRG	20	35	100%	40	0	0	1	0	0	0.07
1518507	TRTQLPPAYTNS	20	31	100%	1	1	1	0	1	0.04	1
1597488	T20	20	20	100%	24	13	1	0	0.54	0.36	0.71
1310777	RTQLPPAYTNSFTRG	21	35	100%	173	10	5	5	0.06	0.03	0.1
1691511	RTQLPPAYTNSFTRGV	21	36	100%	43	0	0	2	0	0	0.06
1387981	RTQLPPAYTNSFTRGVYYPDKVFRS	21	45	100%	1	1	1	0	1	0.04	1
1392408	RTQLPPAYTNSFTR	21	34	100%	1	1	1	0	1	0.04	1
1392409	RTQLPPAYTNSFTRGVYYPD	21	40	100%	2	2	2	0	1	0.22	1
1392410	RTQLPPAYTNSFTRGVYYPDKVFRSSVLHSTQDLFLPFF	21	59	100%	19	1	1	0	0.05	0	0.22
1500647	RTQLPPAYTNSF	21	32	100%	1	1	1	0	1	0.04	1
1699893	TQLPPAYTNSFTRGVY	22	37	100%	40	0	0	1	0	0	0.07
1394103	TQLPPAYTNSFTRGVYY	22	38	100%	1	0	0	1	0	0	0.94
1392477	TQLPPAYTNSFTRGV	22	36	100%	37	3	2	0	0.08	0.02	0.19
1621943	TQLPPAYTNSFTRGVYYP	22	39	100%	32	0	0	2	0	0	0.09
1518048	TQLPPAYTNSFT	22	33	100%	1	1	1	0	1	0.04	1
1518049	TQLPPAYTNSFTRGVYYPD	22	40	100%	1	1	1	0	1	0.04	1
1688344	QLPPAYTNSFTRGVYY	23	38	100%	40	0	0	1	0	0	0.07
1392382	QLPPAYTNSFTRGV	23	36	100%	1	1	1	0	1	0.04	1
1493701	QLPPAYTNSFTR	23	34	100%	1	1	1	0	1	0.04	1
1542140	QLPPAYTNSFTRGVY	23	37	100%	7	0	0	1	0	0	0.33
1074980	LPPAYTNSF	24	32	100%	41	2	2	0	0.05	0.01	0.14
1309522	LPPAYTNSFTRGVYYPDKVF	24	43	100%	120	13	1	0	0.11	0.06	0.18
1676963	LPPAYTNSFTRGVYYP	24	39	100%	40	0	0	1	0	0	0.07
1470977	LPPAYTNSFTRG	24	35	100%	1	0	0	1	0	0	0.94
2134174	LPPANTNSF	24	32	88.89%	1	1	1	0	1	0.04	1
2134175	LPPSYTNSF	24	32	88.89%	1	1	1	0	1	0.04	1
2134176	LPPVYTNSF	24	32	88.89%	1	1	1	0	1	0.04	1
1071788	PPAYTNSFTRGVYYP	25	39	100%	92	4	2	4	0.04	0.02	0.11
1087685	PPAYTNSFTRGVYYPDKV	25	42	100%	20	0	0	1	0	0	0.13
1686207	PPAYTNSFTRGVYYPD	25	40	100%	40	1	1	0	0.03	0	0.11
1397182	PPAYTNSFTRGVYY	25	38	100%	15	6	1	0	0.4	0.19	0.63
1489035	PPAYTNSFTRGV	25	36	100%	18	1	1	1	0.06	0	0.23
1868322	PPAYTNSFTRGVYYPDKVFR	25	44	100%	1	1	1	0	1	0.04	1
1310705	PAYTNSFTRGVYYPD	26	40	100%	58	17	3	1	0.29	0.19	0.42
1684782	PAYTNSFTRGVYYPDK	26	41	100%	43	1	1	1	0.02	0	0.1
1597482	P26	26	26	100%	24	11	1	0	0.46	0.28	0.63
1862815	P26, Y28, N61, T63, P82, V83, P85, N87, D88, T108, T109, D111, K113, T114, T236, R237, Y269, L270	26	270	100%	1	1	1	0	1	0.04	1
1862818	P26, Y28, T63, P82, V83, P85, N87, D88, T108, T109, D111, K113, T114, T234, R235, Y267, L268	26	270	100%	1	1	1	0	1	0.04	1
1864103	P26, Y28, T63, V81, P83, N85, T106, T107, K111, T233, R234, Y266, L267	26	270	100%	1	1	1	0	1	0.04	1
1346802	A27, Y28, T29, N30, F32, N61, W64, H66, I68, H69, K97, F186, N211, L212, V213, R214, D215, L216, P217, Q218, S605, N606	27	606	100%	10	10	1	0	1	0.74	1
1647208	AYTNSFTRGVYYPDKV	27	42	100%	20	1	1	0	0.05	0	0.21
1414748	AYTNSFTRGVYY	27	38	100%	1	1	1	0	1	0.04	1
1539656	AYTNSFTRGVYYPDK	27	41	100%	7	0	0	1	0	0	0.33
1861097	AYTNSFTRGVYYPDKVFRSS	27	46	100%	2	1	1	1	0.5	0.02	0.97
2134856	A27, Y28, T29, N30, F32, N61, W64, H66, I68, H69, K97, F186, N211, L212, V213, R214, D215, L216, P217, Q218, S605, N606	27	606	100%	1	1	1	0	1	0.04	1
1972958	AYTNSFTR	27	34	100%	1	1	1	0	1	0.04	1
2060963	AYTNSFTRGVYYPDKVFRSSVLHST	27	51	100%	1	0	0	1	0	0	0.94
1328804	YTNSFTRGVY	28	37	100%	18	5	3	0	0.28	0.12	0.49
1334416	YTNSFTRGVYY	28	38	100%	6	1	1	0	0.17	0.01	0.56
1710979	YTNSFTRGVYYPDKVF	28	43	100%	40	0	0	1	0	0	0.07
1596866	Y28, T63, P82, V83, P85, N87, D88, T108, T109, D111, K113, T114, T236, R237, Y269, L270	28	270	100%	1	1	1	0	1	0.04	1
1538190	YTNSFTRGVYYP	28	39	100%	1	1	1	0	1	0.04	1
2134375	YTNSFTRGV	28	36	100%	1	1	1	0	1	0.04	1
2001413	YTNSFTRGVYYPDKV	28	42	100%	36	3	1	0	0.08	0.02	0.2
1313769	TNSFTRGVYYPDKVF	29	43	100%	53	0	0	2	0	0	0.07
1699568	TNSFTRGVYYPDKVFR	29	44	100%	40	0	0	1	0	0	0.07
1394101	TNSFTRGVYYPDKVFRS	29	45	100%	1	0	0	1	0	0	0.94
1621710	TNSFTRGVYYPDKVFRSS	29	46	100%	32	11	2	0	0.34	0.2	0.5
1517329	TNSFTRGVYYPD	29	40	100%	1	1	1	0	1	0.04	1
2116287	TNSFTRGVYYPDKVFRSSVLHS	29	50	100%	36	0	0	1	0	0	0.08
1322611	NSFTRGVYY	30	38	100%	7	1	1	1	0.14	0.01	0.5
1683533	NSFTRGVYYPDKVFRS	30	45	100%	40	0	0	1	0	0	0.07
1483713	NSFTRGVYYPDK	30	41	100%	1	1	1	0	1	0.04	1
2134936	N30, F59, N211, V213, P217, Q218, F220, K278, T286, D287, A288, V289, D290, L293, D294, L296, T307, T604, S605, N606, Q607	30	607	100%	1	1	1	0	1	0.04	1
2135526	NSFTRGVYYPDKVFRSSVLH	30	49	100%	1	1	1	0	1	0.04	1
1072624	SFTRGVYYPDKVFRS	31	45	100%	125	26	6	5	0.21	0.15	0.29
1693102	SFTRGVYYPDKVFRSS	31	46	100%	43	0	0	2	0	0	0.06
1392421	SFTRGVYYPDKVFRSSVLHS	31	50	100%	3	2	2	1	0.67	0.14	0.98
1503852	SFTRGVYYPDKV	31	42	100%	18	3	2	0	0.17	0.05	0.37
1659055	FTRGVYYPDKVFRSSV	32	47	100%	40	0	0	1	0	0	0.07
1087758	TRGVYYPDKVFRSSVLHS	33	50	100%	22	1	1	1	0.05	0	0.19
1313797	TRGVYYPDKVFRSSV	33	47	100%	54	1	1	2	0.02	0	0.1
1330245	TRGVYYPDKVFRSSVL	33	48	100%	40	0	0	1	0	0	0.07
1330243	TRGVYYPDKVFRS	33	45	100%	1	1	1	0	1	0.04	1
1870014	TRGVYYPDKVFRSSVLHSTQ	33	52	100%	1	1	1	0	1	0.04	1
1309570	RGVYYPDKVFRSSVLHSTQD	34	53	100%	120	3	1	0	0.03	0.01	0.07
1330007	RGVYYPDKVFRSSVLH	34	49	100%	40	0	0	1	0	0	0.07
1330004	RGVYYPDKVFRS	34	45	100%	1	0	0	1	0	0	0.94
1596194	RGVYYPDKVFRSSVLHSTQDLFLPFFSNVT	34	63	100%	52	52	1	0	1	0.93	1
1330006	RGVYYPDKVFRSSVL	34	48	100%	36	8	1	0	0.22	0.11	0.36
1317887	GVYYPDKVFR	35	44	100%	10	2	2	0	0.2	0.04	0.49
1663738	GVYYPDKVFRSSVLHS	35	50	100%	40	0	0	1	0	0	0.07
1312631	GVYYPDKVFRSS	35	46	100%	3	2	1	1	0.67	0.14	0.98
1329530	GVYYPDKVFRSSVLH	35	49	100%	7	0	0	1	0	0	0.33
1896317	GVYYPDKVF	35	43	100%	1	1	1	0	1	0.04	1
1310935	VYYPDKVFRSSVLHS	36	50	100%	71	13	4	2	0.18	0.11	0.29
1075113	VYYPDKVFRSSVLH	36	49	100%	36	14	1	0	0.39	0.25	0.53
1327741	VYYPDKVF	36	43	100%	4	1	1	0	0.25	0.01	0.74
1707441	VYYPDKVFRSSVLHST	36	51	100%	43	0	0	2	0	0	0.06
1394152	VYYPDKVFRSSVLHSTQ	36	52	100%	12	1	1	0	0.08	0	0.33
1624375	VYYPDKVFRSSVLHSTQD	36	53	100%	32	8	2	0	0.25	0.13	0.4
1625462	VYYPDKVFR	36	44	100%	23	7	2	0	0.3	0.15	0.49
1074296	YYPDKVFRSSVLHST	37	51	100%	90	2	1	3	0.02	0.01	0.08
1711522	YYPDKVFRSSVLHSTQ	37	52	100%	40	0	0	1	0	0	0.07
1539152	YYPDKVFRSSVL	37	48	100%	2	1	1	1	0.5	0.02	0.97
1330384	YPDKVFRSSVLHSTQD	38	53	100%	40	0	0	1	0	0	0.07
1855234	YPDKVFRSSVLHSTQDLFLPFFSNVTW	38	64	100%	1	1	1	0	1	0.04	1
1973004	YPDKVFRS	38	45	100%	1	1	1	0	1	0.04	1
1684908	PDKVFRSSVLHSTQDL	39	54	100%	20	1	1	0	0.05	0	0.21
1486297	PDKVFRSSVLHS	39	50	100%	1	0	0	1	0	0	0.94
1541912	PDKVFRSSVLHSTQD	39	53	100%	7	2	1	0	0.29	0.05	0.64
1651219	DKVFRSSVLHSTQDLF	40	55	100%	40	0	0	1	0	0	0.07
2001015	DKVFRSSVLHSTQDL	40	54	100%	36	3	1	0	0.08	0.02	0.2
2060982	DKVFRSSVLHSTQDLFLPFFSNVTW	40	64	100%	1	0	0	1	0	0	0.94
1310555	KVFRSSVLHSTQDLF	41	55	100%	133	7	3	6	0.05	0.03	0.1
1087601	KVFRSSVLHSTQDLFLPF	41	58	100%	20	0	0	1	0	0	0.13
1320006	KVFRSSVLH	41	49	100%	20	3	2	1	0.15	0.04	0.33
1672528	KVFRSSVLHSTQDLFL	41	56	100%	43	0	0	2	0	0	0.06
1392252	KVFRSSVLHSTQDLFLPFFS	41	60	100%	3	1	1	2	0.33	0.01	0.85
1462870	KVFRSSVLHSTQ	41	52	100%	1	1	1	0	1	0.04	1
1311242	V42, F43, R44, S45, V47, L368, Y369, N370, F377, K378, C379, G381, S383, P384, T385, L390, D428, F429, T430	42	430	100%	1	1	1	0	1	0.04	1
1702892	VFRSSVLHSTQDLFLP	42	57	100%	40	0	0	1	0	0	0.07
1597835	VFRSSVLHSTQDLFLPFFSNVTWFH	42	66	100%	7	5	1	0	0.71	0.34	0.94
1331988	FRSSVLHST	43	51	100%	6	1	1	0	0.17	0.01	0.56
1658556	FRSSVLHSTQDLFLPF	43	58	100%	40	0	0	1	0	0	0.07
1393772	FRSSVLHSTQDLFLPFF	43	59	100%	1	0	0	1	0	0	0.94
1604374	FRSSVLHSTQDLFLPFFS	43	60	100%	32	7	2	0	0.22	0.11	0.36
1435937	FRSSVLHSTQDL	43	54	100%	18	11	2	0	0.61	0.39	0.79
1540326	FRSSVLHSTQDLFLP	43	57	100%	43	2	1	1	0.05	0.01	0.13
2061157	F43, F175, L176, L226	43	226	100%	10	6	1	0	0.6	0.3	0.84
2116183	FRSSVLHSTQDLFLPFFSNVTW	43	64	100%	36	4	1	0	0.11	0.04	0.23
1309574	RSSVLHSTQDLFLPFFSNVT	44	63	100%	120	6	1	0	0.05	0.02	0.1
1691384	RSSVLHSTQDLFLPFF	44	59	100%	40	0	0	1	0	0	0.07
1313684	SSVLHSTQDLFLPFF	45	59	100%	54	4	2	1	0.07	0.03	0.18
1695797	SSVLHSTQDLFLPFFS	45	60	100%	40	0	0	1	0	0	0.07
1873602	SSVLHSTQDLFLP	45	57	100%	1	1	1	0	1	0.04	1
1625440	SSVLHSTQ	45	52	100%	20	3	1	0	0.15	0.04	0.33
1310827	SVLHSTQDLFLPFFS	46	60	100%	104	11	7	0	0.11	0.06	0.18
1696400	SVLHSTQDLFLPFFSN	46	61	100%	43	0	0	2	0	0	0.06
1511000	SVLHSTQDLFLP	46	57	100%	1	0	0	1	0	0	0.94
1704183	VLHSTQDLFLPFFSNV	47	62	100%	40	0	0	1	0	0	0.07
1543153	VLHSTQDLFLPFFSN	47	61	100%	7	1	1	0	0.14	0.01	0.5
1674920	LHSTQDLFLPFFSNVT	48	63	100%	40	0	0	1	0	0	0.07
2135508	LHSTQDLFLPFFSNVTWFHA	48	67	100%	1	1	1	0	1	0.04	1
1087546	HSTQDLFLPFFSNVTWFH	49	66	100%	20	0	0	1	0	0	0.13
1312672	HSTQDLFLPFFSNVT	49	63	100%	89	2	2	1	0.02	0.01	0.08
1664988	HSTQDLFLPFFSNVTW	49	64	100%	40	0	0	1	0	0	0.07
1872219	HSTQDLFLPFFSN	49	61	100%	1	1	1	0	1	0.04	1
1448328	HSTQDLFLPFFS	49	60	100%	18	6	1	1	0.33	0.16	0.54
1075065	STQDLFLPFF	50	59	100%	43	13	2	0	0.3	0.19	0.43
1333812	STQDLFLPF	50	58	100%	23	14	3	0	0.61	0.42	0.77
1696062	STQDLFLPFFSNVTWF	50	65	100%	40	0	0	1	0	0	0.07
1394076	STQDLFLPFFSNVTWFH	50	66	100%	1	0	0	1	0	0	0.94
1620734	STQDLFLPFFSNVTWFHA	50	67	100%	32	6	2	0	0.19	0.08	0.33
1510257	STQDLFLPFFSN	50	61	100%	1	0	0	1	0	0	0.94
1310861	TQDLFLPFFSNVTWF	51	65	100%	80	5	4	3	0.06	0.03	0.14
1330227	TQDLFLPFF	51	59	100%	10	6	2	0	0.6	0.3	0.84
1699838	TQDLFLPFFSNVTWFH	51	66	100%	43	0	0	2	0	0	0.06
1392470	TQDLFLPFFSNVTWFHAIHV	51	70	100%	2	1	1	1	0.5	0.02	0.97
1687460	QDLFLPFFSNVTWFHA	52	67	100%	40	0	0	1	0	0	0.07
2001255	QDLFLPFFSNVTWFH	52	66	100%	36	1	1	0	0.03	0	0.12
1312313	DLFLPFFSNVTWFHA	53	67	100%	53	0	0	2	0	0	0.07
1651312	DLFLPFFSNVTWFHAI	53	68	100%	40	0	0	1	0	0	0.07
1422287	DLFLPFFSNVTW	53	64	100%	1	0	0	1	0	0	0.94
2060983	DLFLPFFSNVTWFHAIHVSGTNGTK	53	77	100%	1	0	0	1	0	0	0.94
2135447	DLFLPFFSNVTWFHAIHVSG	53	72	100%	1	1	1	0	1	0.04	1
1309510	LFLPFFSNVTWFHAIHVSGT	54	73	100%	120	0	0	1	0	0	0.03
1329666	LFLPFFSNV	54	62	100%	5	4	1	0	0.8	0.34	0.99
1674313	LFLPFFSNVTWFHAIH	54	69	100%	40	0	0	1	0	0	0.07
1074888	FLPFFSNVTWFHAI	55	68	100%	36	19	1	0	0.53	0.38	0.67
1329407	FLPFFSNV	55	62	100%	21	6	3	0	0.29	0.13	0.48
1316697	FLPFFSNVTW	55	64	100%	1	1	1	0	1	0.04	1
1657839	FLPFFSNVTWFHAIHV	55	70	100%	40	0	0	1	0	0	0.07
1434470	FLPFFSNVTWFH	55	66	100%	18	0	0	2	0	0	0.15
1540289	FLPFFSNVTWFHAIH	55	69	100%	43	3	2	0	0.07	0.02	0.17
2134062	FLPFFSDVT	55	63	88.89%	1	1	1	0	1	0.04	1
2134063	FLPFFSNVT	55	63	100%	1	1	1	0	1	0.04	1
1310610	LPFFSNVTWFHAIHV	56	70	100%	66	6	4	1	0.09	0.04	0.18
1676870	LPFFSNVTWFHAIHVS	56	71	100%	43	0	0	2	0	0	0.06
1470747	LPFFSNVTWFHA	56	67	100%	1	0	0	1	0	0	0.94
1087674	PFFSNVTWFHAIHVSGTN	57	74	100%	52	1	1	2	0.02	0	0.1
1313276	PFFSNVTWFHAIHVS	57	71	100%	11	2	2	0	0.18	0.03	0.46
1330548	PFFSNVTWF	57	65	100%	17	1	1	2	0.06	0	0.24
1685102	PFFSNVTWFHAIHVSG	57	72	100%	40	0	0	1	0	0	0.07
1393979	PFFSNVTWFHAIHVSGT	57	73	100%	1	0	0	1	0	0	0.94
1486712	PFFSNVTWFHAI	57	68	100%	1	0	0	1	0	0	0.94
1868279	PFFSNVTWFHAIHVSGTNGT	57	76	100%	1	1	1	0	1	0.04	1
2134157	LFFSDVTWF	57	66	77.78%	1	1	1	0	1	0.04	1
2061084	PFFSNVTWFHAIHVSGTNGTK	57	77	100%	7	1	1	0	0.14	0.01	0.5
2061085	PFFSNVTWFHVISGTNGTKRF	57	79	86.96%	7	1	1	0	0.14	0.01	0.5
2116248	PFFSNVTWFHAIHVSGTNGTKR	57	78	100%	36	4	1	0	0.11	0.04	0.23
1656806	FFSNVTWFHAIHVSGT	58	73	100%	40	0	0	1	0	0	0.07
1432608	FFSNVTWFHAIH	58	69	100%	1	0	0	1	0	0	0.94
2001051	FFSNVTWFHAIHVSG	58	72	100%	36	3	1	0	0.08	0.02	0.2
1571025	FSNVTWFHAIHVSGTNGTKRFDN	59	81	100%	21	7	2	0	0.33	0.17	0.53
1658742	FSNVTWFHAIHVSGTN	59	74	100%	40	0	0	1	0	0	0.07
1436320	FSNVTWFHAIHV	59	70	100%	1	0	0	1	0	0	0.94
1540332	FSNVTWFHAIHVSGT	59	73	100%	7	1	1	0	0.14	0.01	0.5
1595681	FSNVTWFHAIHVSGTNGTKRFDNPVLPFND	59	88	100%	52	52	1	0	1	0.93	1
1861355	FSNVTWFHAIHVSGTNGTKRF	59	79	100%	1	0	0	1	0	0	0.94
2134075	FSDVTWFHA	59	67	88.89%	1	1	1	0	1	0.04	1
2134076	FSNVTWFHA	59	67	100%	1	1	1	0	1	0.04	1
1694912	SNVTWFHAIHVSGTNG	60	75	100%	40	0	0	1	0	0	0.07
1507585	SNVTWFHAIHVS	60	71	100%	1	0	0	1	0	0	0.94
2127915	SNVTWFHAIHVSGTN	60	74	100%	2	1	1	0	0.5	0.02	0.97
2134489	SNVTWFHVISGTNGT	60	76	82.35%	2	1	1	0	0.5	0.02	0.97
1310701	NVTWFHAIHVSGTNG	61	75	100%	122	15	7	4	0.12	0.08	0.19
1391894	NVTWFHAIHVSGTNGT	61	76	100%	58	0	0	3	0	0	0.06
1392339	NVTWFHAIHVS	61	71	100%	1	1	1	0	1	0.04	1
1392340	NVTWFHAIHVSGTN	61	74	100%	1	1	1	0	1	0.04	1
1392341	NVTWFHAIHVSGTNGTKRFD	61	80	100%	2	1	1	1	0.5	0.02	0.97
1485114	NVTWFHAIHVSG	61	72	100%	18	3	1	1	0.17	0.05	0.37
1706485	VTWFHAIHVSGTNGTK	62	77	100%	40	0	0	1	0	0	0.07
1392507	VTWFHAIHVSGTN	62	74	100%	1	1	1	0	1	0.04	1
1392508	VTWFHAIHVSGTNGT	62	76	100%	1	1	1	0	1	0.04	1
1597845	VTWFHAIHV	62	70	100%	6	6	3	0	1	0.61	1
1530190	VTWFHAIHVSGT	62	73	100%	1	1	1	0	1	0.04	1
1942029	VTWFHAISG	62	72	81.82%	4	2	1	0	0.5	0.1	0.89
1334485	TWFHAIHVSGTNGTKRFDNPVLP	63	85	100%	20	1	1	0	0.05	0	0.21
1334486	TWFHAIHVSGTNGTKRFDNPVLP	63	85	100%	20	1	1	0	0.05	0	0.21
1701187	TWFHAIHVSGTNGTKR	63	78	100%	40	0	0	1	0	0	0.07
1392483	TWFHAIHVSGTNGTK	63	77	100%	8	1	1	1	0.13	0.01	0.46
1397450	TWFHAISGTNGTK	63	77	86.67%	1	1	1	0	1	0.04	1
1520585	TWFHAIHVSGTN	63	74	100%	1	0	0	1	0	0	0.94
1309611	WFHAIHVSGTNGTKRFDNPV	64	83	100%	121	4	2	0	0.03	0.01	0.08
1707615	WFHAIHVSGTNGTKRF	64	79	100%	40	0	0	1	0	0	0.07
1394153	WFHAIHVSGTNGTKRFD	64	80	100%	1	0	0	1	0	0	0.94
2135027	W64	64	64	100%	1	1	1	0	1	0.04	1
1624434	WFHAIHVSGTNGTKRFDN	64	81	100%	32	1	1	1	0.03	0	0.13
1532035	WFHAIHVSGTNG	64	75	100%	1	0	0	1	0	0	0.94
2135028	W64, H66, I68, H69, K77, K97, S98, K147, W152, N185, F186, K187, N211, L212, V213, R214, H245, R246, S247, A263	64	263	100%	1	1	1	0	1	0.04	1
2001386	WFHAIHVSGTNGTKR	64	78	100%	36	6	1	0	0.17	0.07	0.3
1087510	FHAIHVSGTNGTKRFDNP	65	82	100%	20	0	0	1	0	0	0.13
1312426	FHAIHVSGTNGTKRF	65	79	100%	54	2	2	1	0.04	0.01	0.13
1657105	FHAIHVSGTNGTKRFD	65	80	100%	40	0	0	1	0	0	0.07
1433135	FHAIHVSGTNGT	65	76	100%	1	0	0	1	0	0	0.94
1948275	FHAIHVSGTNGTKRFDNPVLPF	65	86	100%	2	2	1	0	1	0.22	1
1310473	HAIHVSGTNGTKRFD	66	80	100%	52	0	0	4	0	0	0.07
1664052	HAIHVSGTNGTKRFDN	66	81	100%	43	0	0	2	0	0	0.06
1446187	HAIHVSGTNGTK	66	77	100%	1	1	1	0	1	0.04	1
2061024	HAIHVSGTNGTKRFDNPVLPFNDGV	66	90	100%	1	0	0	1	0	0	0.94
1644361	AIHVSGTNGTKRFDNP	67	82	100%	40	0	0	1	0	0	0.07
1409235	AIHVSGTNGTKR	67	78	100%	18	1	1	1	0.06	0	0.23
1539468	AIHVSGTNGTKRFDN	67	81	100%	43	9	2	0	0.21	0.11	0.33
1597653	AIHVSGTNGTKRFDNPVLPFNDGVY	67	91	100%	7	0	0	1	0	0	0.33
1666480	IHVSGTNGTKRFDNPV	68	83	100%	40	0	0	1	0	0	0.07
1318206	HVSGTNGTK	69	77	100%	5	2	1	1	0.4	0.08	0.8
1312678	HVSGTNGTKRFDNPV	69	83	100%	53	1	1	1	0.02	0	0.1
1665218	HVSGTNGTKRFDNPVL	69	84	100%	40	0	0	1	0	0	0.07
1448799	HVSGTNGTKRFD	69	80	100%	1	0	0	1	0	0	0.94
1597477	H69, V70	69	70	100%	24	8	1	0	0.33	0.18	0.51
2134893	H69, V70, Y144, L242, A243, L244, G261	69	261	100%	1	1	1	0	1	0.04	1
1705866	VSGTNGTKRFDNPVLP	70	85	100%	40	0	0	1	0	0	0.07
1528940	VSGTNGTKRFDN	70	81	100%	1	0	0	1	0	0	0.94
2001382	VSGTNGTKRFDNPVL	70	84	100%	36	10	1	0	0.28	0.16	0.42
1310799	SGTNGTKRFDNPVLP	71	85	100%	80	2	2	5	0.03	0.01	0.09
1693390	SGTNGTKRFDNPVLPF	71	86	100%	43	0	0	2	0	0	0.06
1394052	SGTNGTKRFDNPVLPFN	71	87	100%	1	0	0	1	0	0	0.94
2135003	S71, K97, S98, T124, Y145, H146, K147, K150, S151, W152, E180, G181, K182, Q183, N185, V213, H245, S247, Y248, L249, T259, A260, A262	71	262	100%	1	1	1	0	1	0.04	1
1392424	SGTNGTKRFDNPVLPFNDGV	71	90	100%	2	1	1	1	0.5	0.02	0.97
1619518	SGTNGTKRFDNPVLPFND	71	88	100%	32	0	0	2	0	0	0.09
1504492	SGTNGTKRFDNP	71	82	100%	1	1	1	0	1	0.04	1
2116269	SGTNGTKRFDNPVLPFNDGVYF	71	92	100%	1	1	1	0	1	0.04	1
1663132	GTNGTKRFDNPVLPFN	72	87	100%	40	0	0	1	0	0	0.07
1444629	GTNGTKRFDNPV	72	83	100%	1	1	1	0	1	0.04	1
1087746	TNGTKRFDNPVLPFNDGV	73	90	100%	20	0	0	1	0	0	0.13
1313767	TNGTKRFDNPVLPFN	73	87	100%	89	10	2	1	0.11	0.06	0.19
1699473	TNGTKRFDNPVLPFND	73	88	100%	40	1	1	0	0.03	0	0.11
1517127	TNGTKRFDNPVL	73	84	100%	18	2	2	0	0.11	0.02	0.3
1309533	NGTKRFDNPVLPFNDGVYFA	74	93	100%	120	2	1	0	0.02	0	0.06
1681923	NGTKRFDNPVLPFNDG	74	89	100%	40	1	1	0	0.03	0	0.11
1480512	NGTKRFDNPVLP	74	85	100%	1	1	1	0	1	0.04	1
1663100	GTKRFDNPVLPFNDGV	75	90	100%	40	1	1	0	0.03	0	0.11
1540604	GTKRFDNPVLPFNDG	75	89	100%	7	0	0	1	0	0	0.33
1663099	GTKRFDNPV	75	83	100%	3	0	0	1	0	0	0.61
1861493	GTKRFDNPVLPFNDGVYFAST	75	95	100%	1	0	0	1	0	0	0.94
1310848	TKRFDNPVLPFNDGV	76	90	100%	87	10	2	2	0.11	0.06	0.2
1698835	TKRFDNPVLPFNDGVY	76	91	100%	43	1	1	1	0.02	0	0.1
1309824	KRFDNPVL	77	84	100%	6	5	1	1	0.83	0.42	0.99
1329643	KRFDNPVLP	77	85	100%	5	5	1	0	1	0.55	1
1312897	KRFDNPVLPFNDGVY	77	91	100%	53	1	1	1	0.02	0	0.1
1671865	KRFDNPVLPFNDGVYF	77	92	100%	40	1	1	0	0.03	0	0.11
2135502	KRFDNPVLPFNDGVYFASTE	77	96	100%	1	1	1	0	1	0.04	1
1087399	RFDNPVLPF	78	86	100%	53	9	6	1	0.17	0.09	0.29
1690004	RFDNPVLPFNDGVYFA	78	93	100%	40	0	0	1	0	0	0.07
1394021	RFDNPVLPFNDGVYFAS	78	94	100%	1	0	0	1	0	0	0.94
2145131	RFDNPVLPFNDGVYFAST	78	95	100%	16	2	1	0	0.13	0.02	0.33
1316333	FDNPVLPFNDGVYF	79	92	100%	4	2	1	0	0.5	0.1	0.89
1331942	FDNPVLPFNDGVYFA	79	93	100%	71	14	3	0	0.2	0.12	0.3
1656477	FDNPVLPFNDGVYFAS	79	94	100%	40	0	0	1	0	0	0.07
1432023	FDNPVLPFNDGV	79	90	100%	18	4	2	0	0.22	0.08	0.43
2060997	FDNPVLPFNDGVYFASTEKSNIIRG	79	103	100%	1	0	0	1	0	0	0.94
1651817	DNPVLPFNDGVYFAST	80	95	100%	40	0	0	1	0	0	0.07
1346811	D80, D215, K417, E484, N501, D614, A701	80	701	100%	92	82	1	0	0.89	0.81	0.94
1597474	D80	80	80	100%	24	9	1	0	0.38	0.21	0.55
1310678	NPVLPFNDGVYFAST	81	95	100%	137	2	2	7	0.01	0	0.05
1087666	NPVLPFNDGVYFASTEKS	81	98	100%	20	0	0	1	0	0	0.13
1683245	NPVLPFNDGVYFASTE	81	96	100%	43	1	1	1	0.02	0	0.1
1392331	NPVLPFNDGVYFASTEKSNI	81	100	100%	2	0	0	2	0	0	0.76
1686978	PVLPFNDGVYFASTEK	82	97	100%	40	3	1	0	0.08	0.02	0.18
2001252	PVLPFNDGVYFASTE	82	96	100%	36	5	1	0	0.14	0.06	0.26
1075093	VLPFNDGVYFASTEK	83	97	100%	43	8	1	1	0.19	0.09	0.31
1334231	VLPFNDGVYFA	83	93	100%	15	2	1	0	0.13	0.02	0.35
1704340	VLPFNDGVYFASTEKS	83	98	100%	40	4	1	0	0.1	0.03	0.21
1526092	VLPFNDGVYFAS	83	94	100%	1	0	0	1	0	0	0.94
1321049	LPFNDGVYF	84	92	100%	19	8	5	1	0.42	0.23	0.62
1676880	LPFNDGVYFASTEKSN	84	99	100%	40	3	1	0	0.08	0.02	0.18
1596021	LPFNDGVYFASTEKSNIIRGWIFGTTLDS	84	112	100%	52	52	1	0	1	0.93	1
1313279	PFNDGVYFASTEKSN	85	99	100%	89	2	1	2	0.02	0.01	0.08
1685160	PFNDGVYFASTEKSNI	85	100	100%	40	2	1	0	0.05	0.01	0.14
1393981	PFNDGVYFASTEKSNII	85	101	100%	12	1	1	0	0.08	0	0.33
1615663	PFNDGVYFASTEKSNIIR	85	102	100%	32	5	2	0	0.16	0.06	0.29
1486814	PFNDGVYFASTE	85	96	100%	18	1	1	1	0.06	0	0.23
2116250	PFNDGVYFASTEKSNIIRGWIF	85	106	100%	36	1	1	0	0.03	0	0.12
1310413	FNDGVYFASTEKSNI	86	100	100%	46	1	1	2	0.02	0	0.09
1658043	FNDGVYFASTEKSNII	86	101	100%	43	2	1	1	0.05	0.01	0.13
1397173	NDGVYFASTEKSNIIR	87	102	100%	35	11	2	0	0.31	0.19	0.46
1541691	NDGVYFASTEKSNII	87	101	100%	9	2	1	1	0.22	0.04	0.54
2134460	NDGVYFASIEKSNII	87	101	93.33%	2	2	1	0	1	0.22	1
1315357	DGVYFASTEK	88	97	100%	2	1	1	0	0.5	0.02	0.97
1650726	DGVYFASTEKSNIIRG	88	103	100%	40	1	1	0	0.03	0	0.11
2001007	DGVYFASTEKSNIIR	88	102	100%	36	1	1	0	0.03	0	0.12
2135444	DGVYFASTEKSNIIRGWIFG	88	107	100%	1	1	1	0	1	0.04	1
1087541	GVYFASTEKSNIIRGWIF	89	106	100%	20	0	0	1	0	0	0.13
1312627	GVYFASTEK	89	97	100%	74	16	7	1	0.22	0.14	0.32
1312628	GVYFASTEKSNIIRG	89	103	100%	53	0	0	2	0	0	0.07
1663719	GVYFASTEKSNIIRGW	89	104	100%	20	1	1	0	0.05	0	0.21
1707226	VYFASTEKSNIIRGWI	90	105	100%	40	1	1	0	0.03	0	0.11
1074069	YFASTEKSNIIRGWI	91	105	100%	112	4	4	5	0.04	0.01	0.09
1708973	YFASTEKSNIIRGWIF	91	106	100%	23	1	1	1	0.04	0	0.18
1392525	YFASTEKSNIIRGWIFGTTL	91	110	100%	2	1	1	1	0.5	0.02	0.97
1534364	YFASTEKSNIIR	91	102	100%	18	4	1	1	0.22	0.08	0.43
1862741	YFASTEKSNIIRGWIFGTTLD	91	111	100%	1	0	0	1	0	0	0.94
1074883	FASTEKSNIIRGWIFGTTLDSKTQSLLIVNNATNVVIKVCEFQ	92	134	100%	4	1	1	0	0.25	0.01	0.74
1334461	FASTEKSNIIRGWIF	92	106	100%	20	2	1	0	0.1	0.02	0.27
1338210	F92, A93, S94, T95, E96, K97, S98, N99, I100, I101, R102, C136, N137, D138, P139, F140, L141, G142, V143, Y144, V171, S172, Q173, P174, F175, L176, M177, D178, L179, L242, A243, L244, H245, R246, S247, Y248, L249, T250, P251, G252, D253, S254, S255, S256, G257, W258, T259, A260, G261, A262, A263, A264	92	264	100%	1	1	1	0	1	0.04	1
1656144	FASTEKSNIIRGWIFG	92	107	100%	20	1	1	0	0.05	0	0.21
1393761	FASTEKSNIIRGWIFGT	92	108	100%	1	0	0	1	0	0	0.94
1603889	FASTEKSNIIRGWIFGTT	92	109	100%	32	1	1	1	0.03	0	0.13
1597678	FASTEKSNIIRGWIFGTTLDSKTQS	92	116	100%	8	0	0	2	0	0	0.3
1888578	FASTEKSNI	92	100	100%	1	1	1	0	1	0.04	1
1312226	ASTEKSNIIRGWIFG	93	107	100%	53	0	0	2	0	0	0.07
1646309	ASTEKSNIIRGWIFGT	93	108	100%	40	0	0	1	0	0	0.07
1628212	ASTEKSN	93	99	100%	5	0	0	1	0	0	0.43
1309587	STEKSNIIRGWIFGTTLDSK	94	113	100%	120	2	1	0	0.02	0	0.06
1695887	STEKSNIIRGWIFGTT	94	109	100%	40	0	0	1	0	0	0.07
1509877	STEKSNIIRGWI	94	105	100%	1	0	0	1	0	0	0.94
2001324	STEKSNIIRGWIFGT	94	108	100%	36	1	1	0	0.03	0	0.12
1075071	TEKSNIIRGW	95	104	100%	42	7	3	0	0.17	0.08	0.28
1697609	TEKSNIIRGWIFGTTL	95	110	100%	40	0	0	1	0	0	0.07
1513477	TEKSNIIRGWIF	95	106	100%	1	1	1	0	1	0.04	1
1542714	TEKSNIIRGWIFGTT	95	109	100%	7	0	0	1	0	0	0.33
1310361	EKSNIIRGWIFGTTL	96	110	100%	69	9	4	1	0.13	0.07	0.23
1654491	EKSNIIRGWIFGTTLD	96	111	100%	43	0	0	2	0	0	0.06
1428230	EKSNIIRGWIFG	96	107	100%	1	0	0	1	0	0	0.94
2134878	E96, K97, S98, N99, R102, N121, N122, A123, T124, V143, N149, K150, S151, W152, E154, Q173, D178, E180, G181, K182, Q183	96	183	100%	1	1	1	0	1	0.04	1
1070815	KSNIIRGWIFGTTLD	97	111	100%	90	2	1	3	0.02	0.01	0.08
1087596	KSNIIRGWIFGTTLDSKT	97	114	100%	20	0	0	1	0	0	0.13
1672170	KSNIIRGWIFGTTLDS	97	112	100%	40	0	0	1	0	0	0.07
1462222	KSNIIRGWIFGT	97	108	100%	18	3	1	1	0.17	0.05	0.37
1867312	KSNIIRGWIFGTTLDSKTQS	97	116	100%	1	1	1	0	1	0.04	1
1694790	SNIIRGWIFGTTLDSK	98	113	100%	40	0	0	1	0	0	0.07
1392572	S98	98	98	100%	15	1	1	0	0.07	0	0.27
1682148	NIIRGWIFGTTLDSKT	99	114	100%	40	0	0	1	0	0	0.07
1393950	NIIRGWIFGTTLDSKTQ	99	115	100%	12	1	1	0	0.08	0	0.33
2134954	N99, R102, G103, W104, I119, N121, Y170, S172, Q173, P174, F175, L176, M177, D178, E180, K182, N188, R190, F192, H207, E224, L226	99	226	100%	1	1	1	0	1	0.04	1
1614938	NIIRGWIFGTTLDSKTQS	99	116	100%	32	1	1	1	0.03	0	0.13
1541739	NIIRGWIFGTTLDSK	99	113	100%	7	0	0	1	0	0	0.33
2003331	N99, R102, V126, Y170, S172, Q173, P174, F175, L176, M177, R190, L226, V227	99	227	100%	1	1	1	0	1	0.04	1
2116232	NIIRGWIFGTTLDSKTQSLLIV	99	120	100%	36	3	1	0	0.08	0.02	0.2
1666636	IIRGWIFGTTLDSKTQ	100	115	100%	40	0	0	1	0	0	0.07
2001115	IIRGWIFGTTLDSKT	100	114	100%	36	2	1	0	0.06	0.01	0.16
1310506	IRGWIFGTTLDSKTQ	101	115	100%	140	7	3	6	0.05	0.02	0.1
1667918	IRGWIFGTTLDSKTQS	101	116	100%	43	0	0	2	0	0	0.06
1392227	IRGWIFGTTLDSKTQSLLIV	101	120	100%	2	1	1	1	0.5	0.02	0.97
1454193	IRGWIFGTTLDS	101	112	100%	1	0	0	1	0	0	0.94
1690264	RGWIFGTTLDSKTQSL	102	117	100%	40	0	0	1	0	0	0.07
1392397	RGWIFGTT	102	109	100%	1	1	1	0	1	0.04	1
2061158	R102, Y145, K147, W152, R246, Y248, P251, G252	102	252	100%	1	1	1	0	1	0.04	1
2134252	RGWIFGTTLDSKT	102	114	100%	3	0	0	1	0	0	0.61
1663761	GWIFGTTLDSKTQSLL	103	118	100%	40	0	0	1	0	0	0.07
1445657	GWIFGTTLDSKT	103	114	100%	18	9	1	1	0.5	0.29	0.7
1540646	GWIFGTTLDSKTQSL	103	117	100%	43	2	1	1	0.05	0.01	0.13
1075116	WIFGTTLDSK	104	113	100%	58	1	1	1	0.02	0	0.09
1707728	WIFGTTLDSKTQSLLI	104	119	100%	40	0	0	1	0	0	0.07
1532227	WIFGTTLDSKTQ	104	115	100%	1	0	0	1	0	0	0.94
1087553	IFGTTLDSKTQSLLIVNN	105	122	100%	21	1	1	1	0.05	0	0.2
1312693	IFGTTLDSKTQSLLI	105	119	100%	53	1	1	1	0.02	0	0.1
1666081	IFGTTLDSKTQSLLIV	105	120	100%	40	0	0	1	0	0	0.07
1450609	IFGTTLDSKTQS	105	116	100%	1	1	1	0	1	0.04	1
1597707	IFGTTLDSKTQSLLIVNNAT	105	124	100%	30	9	1	0	0.3	0.16	0.46
2061028	IFGTTLDSKTQSLLIVNNATNVVIK	105	129	100%	1	0	0	1	0	0	0.94
1310392	FGTTLDSKTQSLLIV	106	120	100%	101	3	3	2	0.03	0.01	0.08
1657063	FGTTLDSKTQSLLIVN	106	121	100%	43	0	0	2	0	0	0.06
1393764	FGTTLDSKTQSLLIVNN	106	122	100%	1	0	0	1	0	0	0.94
1604068	FGTTLDSKTQSLLIVNNA	106	123	100%	32	0	0	2	0	0	0.09
1433065	FGTTLDSKTQSL	106	117	100%	1	0	0	1	0	0	0.94
1663213	GTTLDSKTQSLLIVNN	107	122	100%	40	0	0	1	0	0	0.07
1540612	GTTLDSKTQSLLIVN	107	121	100%	7	1	1	0	0.14	0.01	0.5
1861497	GTTLDSKTQSLLIVNNATNVV	107	127	100%	1	0	0	1	0	0	0.94
1700628	TTLDSKTQSLLIVNNA	108	123	100%	40	0	0	1	0	0	0.07
1075075	TLDSKTQSL	109	117	100%	77	6	5	3	0.08	0.04	0.16
1313752	TLDSKTQSLLIVNNA	109	123	100%	89	0	0	3	0	0	0.04
1698953	TLDSKTQSLLIVNNAT	109	124	100%	40	1	1	0	0.03	0	0.11
1596350	TLDSKTQSLLIVNNATNVVIKVCEFQFCND	109	138	100%	52	52	1	0	1	0.93	1
1972998	TLDSKTQSLLIV	109	120	100%	17	14	1	0	0.82	0.6	0.95
1673817	LDSKTQSLLIVNNATN	110	125	100%	40	0	0	1	0	0	0.07
1310336	DSKTQSLLIVNNATN	111	125	100%	94	4	3	5	0.04	0.02	0.1
1652274	DSKTQSLLIVNNATNV	111	126	100%	43	1	1	1	0.02	0	0.1
1392113	DSKTQSLLIVNNATNVVIKV	111	130	100%	2	1	1	1	0.5	0.02	0.97
1694055	SKTQSLLIVNNATNVV	112	127	100%	40	1	1	0	0.03	0	0.11
1505910	SKTQSLLIVNNA	112	123	100%	1	0	0	1	0	0	0.94
1505911	SKTQSLLIVNNATN	112	125	100%	1	1	1	0	1	0.04	1
2001304	SKTQSLLIVNNATNV	112	126	100%	36	1	1	0	0.03	0	0.12
1087599	KTQSLLIVNNATNVVIKV	113	130	100%	52	0	0	3	0	0	0.07
1312917	KTQSLLIVNNATNVV	113	127	100%	53	1	1	1	0.02	0	0.1
1672400	KTQSLLIVNNATNVVI	113	128	100%	20	1	1	0	0.05	0	0.21
1393881	KTQSLLIVNNATNVVIK	113	129	100%	1	0	0	1	0	0	0.94
1462655	KTQSLLIVNNAT	113	124	100%	1	1	1	0	1	0.04	1
2116217	KTQSLLIVNNATNVVIKVCEFQ	113	134	100%	36	3	1	0	0.08	0.02	0.2
1699929	TQSLLIVNNATNVVIK	114	129	100%	20	1	1	0	0.05	0	0.21
1072027	QSLLIVNNATNVVIK	115	129	100%	44	4	2	1	0.09	0.03	0.19
1688971	QSLLIVNNATNVVIKV	115	130	100%	40	0	0	1	0	0	0.07
1495152	QSLLIVNNATNV	115	126	100%	18	3	1	1	0.17	0.05	0.37
2145275	Q115, N165, T167, I231, G232, R346, A348, S349, Y351, A352, W353, N354, R355, K356, Y449, N450, L452, R466, I468, T470, E471, I472, G482, V483, E484, F490, L492	115	492	100%	1	1	1	0	1	0.04	1
1310810	SLLIVNNATNVVIKV	116	130	100%	77	14	3	2	0.18	0.11	0.28
1694316	SLLIVNNATNVVIKVC	116	131	100%	43	0	0	2	0	0	0.06
1312997	LLIVNNATNVVIKVC	117	131	100%	53	0	0	2	0	0	0.07
1675918	LLIVNNATNVVIKVCE	117	132	100%	40	0	0	1	0	0	0.07
1597735	LLIVNNATNVVIKVCEFQFCNDPFL	117	141	100%	7	0	0	1	0	0	0.33
1675223	LIVNNATNVVIKVCEF	118	133	100%	40	0	0	1	0	0	0.07
2001184	LIVNNATNVVIKVCE	118	132	100%	36	1	1	0	0.03	0	0.12
2061056	LIVNNATNVVIKVCEFQFCNDPFLG	118	142	100%	1	0	0	1	0	0	0.94
1668733	IVNNATNVVIKVCEFQ	119	134	100%	20	1	1	0	0.05	0	0.21
1540905	IVNNATNVVIKVCEF	119	133	100%	7	1	1	0	0.14	0.01	0.5
1704917	VNNATNVVIKVCEFQF	120	135	100%	20	1	1	0	0.05	0	0.21
1394134	VNNATNVVIKVCEFQFC	120	136	100%	12	1	1	0	0.08	0	0.33
1623423	VNNATNVVIKVCEFQFCN	120	137	100%	32	0	0	2	0	0	0.09
1071586	NNATNVVIKVCEFQF	121	135	100%	158	6	4	6	0.04	0.02	0.08
1087663	NNATNVVIKVCEFQFCND	121	138	100%	20	0	0	1	0	0	0.13
1682935	NNATNVVIKVCEFQFC	121	136	100%	43	0	0	2	0	0	0.06
1392329	NNATNVVIKVCEFQFCNDPF	121	140	100%	2	2	2	0	1	0.22	1
1972987	NNATNVVIKVCE	121	132	100%	17	9	1	0	0.53	0.31	0.73
1332861	NATNVVIKV	122	130	100%	8	4	2	0	0.5	0.19	0.8
1680943	NATNVVIKVCEFQFCN	122	137	100%	40	0	0	1	0	0	0.07
1334512	A123, G142, Y144, F157, R158, N164	123	164	100%	9	2	1	0	0.22	0.04	0.54
1646524	ATNVVIKVCEFQFCND	123	138	100%	40	0	0	1	0	0	0.07
1413360	ATNVVIKVCEFQ	123	134	100%	1	1	1	0	1	0.04	1
1539617	ATNVVIKVCEFQFCN	123	137	100%	7	0	0	1	0	0	0.33
1862813	A123, T124, Y144, Y145, H146, K147, K150, S151, W152, M153	123	153	100%	1	1	1	0	1	0.04	1
1861070	ATNVVIKVCEFQFCNDPFLGV	123	143	100%	1	0	0	1	0	0	0.94
1699608	TNVVIKVCEFQFCNDP	124	139	100%	20	1	1	0	0.05	0	0.21
2001339	TNVVIKVCEFQFCND	124	138	100%	22	1	1	0	0.05	0	0.19
1313262	NVVIKVCEFQFCNDP	125	139	100%	54	2	2	1	0.04	0.01	0.13
1684331	NVVIKVCEFQFCNDPF	125	140	100%	40	0	0	1	0	0	0.07
1310930	VVIKVCEFQFCNDPF	126	140	100%	69	15	5	0	0.22	0.14	0.33
1706714	VVIKVCEFQFCNDPFL	126	141	100%	43	0	0	2	0	0	0.06
1073887	VIKVCEFQFCNDPFL	127	141	100%	44	5	2	1	0.11	0.04	0.22
1703471	VIKVCEFQFCNDPFLG	127	142	100%	40	0	0	1	0	0	0.07
1394119	VIKVCEFQFCNDPFLGV	127	143	100%	1	0	0	1	0	0	0.94
1623119	VIKVCEFQFCNDPFLGVY	127	144	100%	32	1	1	1	0.03	0	0.13
1524602	VIKVCEFQFCND	127	138	100%	18	10	1	1	0.56	0.34	0.75
2116298	VIKVCEFQFCNDPFLGVYYHKN	127	148	100%	36	5	1	0	0.14	0.06	0.26
1666914	IKVCEFQFCNDPFLGV	128	143	100%	40	0	0	1	0	0	0.07
1452257	IKVCEFQFCNDP	128	139	100%	1	0	0	1	0	0	0.94
1074963	KVCEFQFCNDPFLGVYYHKNNKSWMESEFRVYSSANNCTFEYV	129	171	100%	4	1	1	0	0.25	0.01	0.74
1087600	KVCEFQFCNDPFLGVYYH	129	146	100%	20	0	0	1	0	0	0.13
1312928	KVCEFQFCNDPFLGV	129	143	100%	53	0	0	2	0	0	0.07
1672475	KVCEFQFCNDPFLGVY	129	144	100%	40	0	0	1	0	0	0.07
1872669	KVCEFQFCNDPFL	129	141	100%	1	1	1	0	1	0.04	1
1462784	KVCEFQFCNDPFLGVYYHK	129	147	100%	1	1	1	0	1	0.04	1
1462783	KVCEFQFCNDPF	129	140	100%	1	1	1	0	1	0.04	1
1597724	KVCEFQFCNDPFLGVYYHKN	129	148	100%	31	11	2	0	0.35	0.21	0.51
1701830	VCEFQFCNDPFLGVYY	130	145	100%	40	0	0	1	0	0	0.07
1521678	VCEFQFCNDPFL	130	141	100%	1	0	0	1	0	0	0.94
2001357	VCEFQFCNDPFLGVY	130	144	100%	22	5	1	0	0.23	0.09	0.41
1310306	CEFQFCNDPFLGVYY	131	145	100%	111	36	8	1	0.32	0.24	0.42
1647643	CEFQFCNDPFLGVYYH	131	146	100%	43	0	0	2	0	0	0.06
1392070	CEFQFCNDPFLGVYYHKNNK	131	150	100%	2	1	1	1	0.5	0.02	0.97
1415557	CEFQFCNDPFLG	131	142	100%	1	0	0	1	0	0	0.94
1871105	CEFQFCNDPFLGVYH	131	146	93.75%	23	4	1	1	0.17	0.06	0.35
2060967	CEFQFCNDPFLGVYYHKNNKSWMES	131	155	100%	1	0	0	1	0	0	0.94
1329327	EFQFCNDPFLGVYYHK	132	147	100%	40	0	0	1	0	0	0.07
1427237	EFQFCNDPFLGV	132	143	100%	1	0	0	1	0	0	0.94
2060990	EFQFCNDPFLDHKNNKSWMES	132	155	83.33%	7	2	1	0	0.29	0.05	0.64
2060991	EFQFCNDPFLGVYYHKNNKSW	132	152	100%	7	2	1	0	0.29	0.05	0.64
1312484	FQFCNDPFLGVYYHK	133	147	100%	90	2	2	2	0.02	0.01	0.08
1658396	FQFCNDPFLGVYYHKN	133	148	100%	40	0	0	1	0	0	0.07
1329414	FQFCNDPFLGVYY	133	145	100%	1	1	1	0	1	0.04	1
1392157	FQFCNDPFL	133	141	100%	46	6	2	3	0.13	0.06	0.24
1435610	FQFCNDPFLGVYYHKNNK	133	150	100%	1	1	1	0	1	0.04	1
1435609	FQFCNDPFLGVY	133	144	100%	18	5	1	1	0.28	0.12	0.49
1309556	QFCNDPFLGVYYHKNNKSWM	134	153	100%	120	1	1	0	0.01	0	0.05
1687651	QFCNDPFLGVYYHKNN	134	149	100%	40	0	0	1	0	0	0.07
1366891	QFCNDPFLGVYHKNNK	134	150	94.12%	1	1	1	0	1	0.04	1
1394001	QFCNDPFLGVYYHKNNK	134	150	100%	12	1	1	0	0.08	0	0.33
1616213	QFCNDPFLGVYYHKNNKS	134	151	100%	32	1	1	1	0.03	0	0.13
1596153	QFCNDPFLGVYYHKNNKSWMESEFRVYSSA	134	163	100%	52	52	1	0	1	0.93	1
1074884	FCNDPFLGVYY	135	145	100%	43	11	2	0	0.26	0.15	0.38
1656261	FCNDPFLGVYYHKNNK	135	150	100%	40	0	0	1	0	0	0.07
1329390	FCNDPFLGVYYH	135	146	100%	1	0	0	1	0	0	0.94
1540214	FCNDPFLGVYYHKNN	135	149	100%	7	0	0	1	0	0	0.33
1888599	FCNDPFLGV	135	143	100%	1	1	1	0	1	0.04	1
1888600	FCNDPFLGVY	135	144	100%	27	7	2	0	0.26	0.13	0.42
1310311	CNDPFLGVYYHKNNK	136	150	100%	90	15	3	1	0.17	0.1	0.26
1331139	CNDPFLGVY	136	144	100%	26	3	2	1	0.12	0.03	0.26
1338206	C136, N137, D138, P139, F140, L141, G142, V143, T307, V308, E309, K310, G311, I312, Y313, Q314, T315, S316, N317, F318, P621, V622, A623, I624, H625, A626, D627, Q628, L629, T630, P631, T632, W633, R634, V635, Y636	136	636	100%	1	1	1	0	1	0.04	1
1338207	C136, N137, D138, P139, F140, L141, G142, V143, Y144, L242, L244, H245, R246, S247, Y248, L249, T250, P251, G252, D253, S254, S255, S256, G257, W258, T259, A260, G261, A262, A263, A264, Y265	136	265	100%	1	1	1	0	1	0.04	1
1338208	C136, N137, D138, P139, F140, L141, G142, V143, Y144, V171, S172, Q173, P174, F175, L176, M177, D178, L179, L242, A243, L244, H245, R246, S247, Y248, L249, T250, P251, G252, D253, S254, S255, S256, G257, W258, T259, A260, G261, A262, A263, A264	136	264	100%	1	1	1	0	1	0.04	1
1338209	C136, N137, D138, P139, F140, L141, G142, V143, Y144, V171, S172, Q173, P174, F175, L176, M177, D178, L242, A243, L244, H245, R246, S247, Y248, L249, T250, P251, G252, D253, S254, S255, S256, G257, W258, T259, A260, G261, A262, A263, A264	136	264	100%	1	1	1	0	1	0.04	1
1648459	CNDPFLGVYYHKNNKS	136	151	100%	43	0	0	2	0	0	0.06
1417180	CNDPFLGVYYHK	136	147	100%	1	0	0	1	0	0	0.94
1879765	CNDPFLGVYY	136	145	100%	4	4	1	0	1	0.47	1
1871111	CNDPFLGVYHKNNKS	136	151	93.75%	22	2	1	0	0.09	0.02	0.25
1087648	NDPFLGVYYHKNNKSWME	137	154	100%	20	0	0	1	0	0	0.13
1313195	NDPFLGVYYHKNNKS	137	151	100%	53	0	0	2	0	0	0.07
1681260	NDPFLGVYYHKNNKSW	137	152	100%	40	0	0	1	0	0	0.07
1397373	NDPFLGVYHKNNKS	137	151	93.33%	1	1	1	0	1	0.04	1
1479259	NDPFLGVYYHKN	137	148	100%	1	0	0	1	0	0	0.94
1651904	DPFLGVYYHKNNKSWM	138	153	100%	40	0	0	1	0	0	0.07
1423289	DPFLGVYYHKNN	138	149	100%	1	1	1	0	1	0.04	1
1597472	D138	138	138	100%	24	7	1	0	0.29	0.14	0.47
1334474	PFLGVYYHKNNKSWM	139	153	100%	63	3	2	1	0.05	0.02	0.13
1685142	PFLGVYYHKNNKSWME	139	154	100%	20	1	1	0	0.05	0	0.21
1486783	PFLGVYYHKNNK	139	150	100%	18	2	1	1	0.11	0.02	0.3
1862117	PFLGVYYHKNNKSWMESEFRV	139	159	100%	1	0	0	1	0	0	0.94
1346803	F140, G142, V143, Y145, H146, N148, N149, W152, E154, F157, A243, L244, H245	140	245	100%	5	5	1	0	1	0.55	1
1594767	F140	140	140	100%	1	1	1	0	1	0.04	1
1594768	F140, E484	140	484	100%	18	9	1	0	0.5	0.29	0.7
1334513	F140, Y144	140	144	100%	9	2	1	0	0.22	0.04	0.54
1657724	FLGVYYHKNNKSWMES	140	155	100%	40	1	1	0	0.03	0	0.11
1397124	FLGVYYHKNNKSWMESE	140	156	100%	15	4	1	0	0.27	0.1	0.5
1434262	FLGVYYHKNNKS	140	151	100%	1	0	0	1	0	0	0.94
2134879	F140, G142, V143, Y145, H146, N148, N149, W152, E154, F157, A243, L244, H245	140	245	100%	1	1	1	0	1	0.04	1
1310575	LGVYYHKNNKSWMES	141	155	100%	142	12	5	5	0.08	0.05	0.14
1674805	LGVYYHKNNKSWMESE	141	156	100%	43	3	1	1	0.07	0.02	0.17
1393897	LGVYYHKNNKSWMESEF	141	157	100%	12	1	1	0	0.08	0	0.33
1392263	LGVYYHKNNKSWMESEFRVY	141	160	100%	2	0	0	2	0	0	0.76
1625407	LGVYYHKNNKSWMESEFRVYSSA	141	163	100%	20	8	1	0	0.4	0.22	0.6
1872781	LGVYHKNNKSWMESE	141	156	93.75%	23	2	1	1	0.09	0.02	0.24
2116220	LGVYYHKNNKSWMESEFRVYSS	141	162	100%	36	2	1	0	0.06	0.01	0.16
2134450	LDHKNNKSWMESEFR	141	158	77.78%	2	1	1	0	0.5	0.02	0.97
1312630	GVYYHKNNK	142	150	100%	37	9	3	2	0.24	0.13	0.38
1663734	GVYYHKNNKSWMESEF	142	157	100%	40	2	1	0	0.05	0.01	0.14
1445629	GVYYHKNNKSWM	142	153	100%	1	1	1	0	1	0.04	1
1597047	GVYHKNNK	142	150	88.89%	10	10	1	0	1	0.74	1
1597702	GVYYHKNNKSWMESEFRVYSSANNC	142	166	100%	7	0	0	1	0	0	0.33
1948763	GVYYHKNNKSWMESEFRVY	142	160	100%	2	2	1	0	1	0.22	1
2001091	GVYYHKNNKSWMESE	142	156	100%	36	2	1	0	0.06	0.01	0.16
1707433	VYYHKNNKSWMESEFR	143	158	100%	40	1	1	0	0.03	0	0.11
1531739	VYYHKNNKSWME	143	154	100%	1	1	1	0	1	0.04	1
1543331	VYYHKNNKSWMESEF	143	157	100%	7	1	1	0	0.14	0.01	0.5
1087268	Y144, Y145, H146, K147, K150, W152, H245, R246, S247, Y248, L249	144	249	100%	2	2	2	0	1	0.22	1
1309624	YYHKNNKSWMESEFRVYSSA	144	163	100%	120	1	1	0	0.01	0	0.05
1328953	YYHKNNKSW	144	152	100%	38	1	1	4	0.03	0	0.11
1334442	Y144, Y145, H146, K147, K150, W152, R246, S247, Y248, L249, S256	144	256	100%	1	1	1	0	1	0.04	1
1347908	Y144, L242, A243, L244, R246	144	246	100%	1	1	1	0	1	0.04	1
1347909	Y144, L242, A243, L244, R246, A570	144	570	100%	1	1	1	0	1	0.04	1
1711462	YYHKNNKSWMESEFRV	144	159	100%	20	1	1	0	0.05	0	0.21
1347914	Y144, Y145, H146, K147, K150, W152, H245, R246, Y248, L249, T250, P251, G252, S254, S255, S256	144	256	100%	1	1	1	0	1	0.04	1
1347915	Y144, Y145, H146, K147, N148, K150, R246, S247, Y248, L249, T250, P251, G252, D253, S254	144	254	100%	1	1	1	0	1	0.04	1
1347694	Y144	144	144	100%	1	1	1	0	1	0.04	1
1391792	Y144, W152, R246, Y248	144	248	100%	5	5	1	0	1	0.55	1
1391793	Y144, Y145, H146, K147, R246, S247, Y248, L249, T250, P251, G252, S255	144	255	100%	5	5	1	0	1	0.55	1
1397527	Y144, Y145, H146, K147, N148, K150, W152, R246, S247, Y248, L249, T250, P251, D253, S254, S255	144	255	100%	1	1	1	0	1	0.04	1
1539041	YYHKNNKSWMES	144	155	100%	1	1	1	0	1	0.04	1
1597490	Y144	144	144	100%	24	10	1	0	0.42	0.25	0.59
2135029	Y144, L242, A243, L244	144	244	100%	1	1	1	0	1	0.04	1
2135030	Y144, L242, A243, L244, G261	144	261	100%	1	1	1	0	1	0.04	1
2135032	Y144, Y145, H146, K147, K150, W152, R246, Y248, L249, P251, S256	144	256	100%	1	1	1	0	1	0.04	1
2135031	Y144, Y145, H146, K147, K150, W152, R246, S247, Y248, L249	144	249	100%	1	1	1	0	1	0.04	1
2135033	Y144, Y145, H146, K147, K150, W152, Y248	144	248	100%	10	10	1	0	1	0.74	1
1087798	YHKNNKSWMESEFRVYSS	145	162	100%	20	0	0	1	0	0	0.13
1313994	YHKNNKSWMESEFRV	145	159	100%	89	4	2	1	0.04	0.02	0.11
1709353	YHKNNKSWMESEFRVY	145	160	100%	40	0	0	1	0	0	0.07
1391794	Y145, K147, W152, Y248	145	248	100%	5	5	1	0	1	0.55	1
1535090	YHKNNKSWMESE	145	156	100%	18	1	1	1	0.06	0	0.23
1711630	Y145, K150, W152	145	152	100%	12	12	1	0	1	0.78	1
2135034	Y145, H146, K147, R246, Y248, P251, G261	145	261	100%	10	10	1	0	1	0.74	1
2135035	Y145, K147, W152	145	152	100%	10	10	1	0	1	0.74	1
2135036	Y145, K147, Y248	145	248	100%	1	1	1	0	1	0.04	1
1310474	HKNNKSWMESEFRVY	146	160	100%	65	2	2	2	0.03	0.01	0.11
1664561	HKNNKSWMESEFRVYS	146	161	100%	23	1	1	1	0.04	0	0.18
1447351	HKNNKSWMESEF	146	157	100%	1	0	0	1	0	0	0.94
2061026	HKNNKSWMESEFRVYSSANNCTF	146	168	100%	1	0	0	1	0	0	0.94
1338978	K147, E484, N501	147	501	100%	1	1	1	0	1	0.04	1
1671395	KNNKSWMESEFRVYSS	147	162	100%	20	1	1	0	0.05	0	0.21
1460701	KNNKSWMESEFR	147	158	100%	1	0	0	1	0	0	0.94
1541084	KNNKSWMESEFRVYS	147	161	100%	7	0	0	1	0	0	0.33
1683017	NNKSWMESEFRVYSSA	148	163	100%	20	1	1	0	0.05	0	0.21
1393956	NNKSWMESEFRVYSSAN	148	164	100%	1	0	0	1	0	0	0.94
1615115	NNKSWMESEFRVYSSANN	148	165	100%	32	0	0	2	0	0	0.09
1482611	NNKSWMESEFRV	148	159	100%	1	0	0	1	0	0	0.94
2001224	NNKSWMESEFRVYSS	148	162	100%	36	3	1	0	0.08	0.02	0.2
1313211	NKSWMESEFRVYSSA	149	163	100%	70	2	2	2	0.03	0.01	0.1
1682433	NKSWMESEFRVYSSAN	149	164	100%	40	1	1	0	0.03	0	0.11
1481534	NKSWMESEFRVY	149	160	100%	1	0	0	1	0	0	0.94
1074961	KSWMESEFRVY	150	160	100%	36	5	1	0	0.14	0.06	0.26
1672253	KSWMESEFRVYSSANN	150	165	100%	40	2	1	0	0.05	0.01	0.14
1462374	KSWMESEFRVYS	150	161	100%	1	0	0	1	0	0	0.94
1861779	KSWMESEFRVYSSANNCTFEYVSQPFLMDLE	150	180	100%	1	0	0	1	0	0	0.94
1310830	SWMESEFRVYSSANN	151	165	100%	113	5	4	4	0.04	0.02	0.1
1325190	SWMESEFRVY	151	160	100%	7	1	1	1	0.14	0.01	0.5
1333886	SWMESEFRV	151	159	100%	4	2	2	0	0.5	0.1	0.89
1696669	SWMESEFRVYSSANNC	151	166	100%	43	1	1	1	0.02	0	0.1
1392444	SWMESEFRVYSSANNCTFEY	151	170	100%	2	1	1	1	0.5	0.02	0.97
1511580	SWMESEFRVYSS	151	162	100%	2	1	1	1	0.5	0.02	0.97
1707917	WMESEFRVYSSANNCT	152	167	100%	40	1	1	0	0.03	0	0.11
1532569	WMESEFRVYSSA	152	163	100%	1	0	0	1	0	0	0.94
1597854	WMESEFRVYSSANNCTFEYV	152	171	100%	30	5	1	0	0.17	0.07	0.31
2134346	WMESEFRVY	152	160	100%	1	1	1	0	1	0.04	1
2130401	WMESEFRVYSSANNC	152	166	100%	1	0	0	1	0	0	0.94
1087632	MESEFRVYSSANNCTFEY	153	170	100%	21	1	1	1	0.05	0	0.2
1313152	MESEFRVYSSANNCT	153	167	100%	53	0	0	2	0	0	0.07
1679574	MESEFRVYSSANNCTF	153	168	100%	40	1	1	0	0.03	0	0.11
1476062	MESEFRVYSSAN	153	164	100%	1	1	1	0	1	0.04	1
1655322	ESEFRVYSSANNCTFE	154	169	100%	40	1	1	0	0.03	0	0.11
1397111	ESEFRVYSSANNCTFEYV	154	171	100%	15	5	1	0	0.33	0.14	0.57
1429804	ESEFRVYSSANN	154	165	100%	1	0	0	1	0	0	0.94
2001041	ESEFRVYSSANNCTF	154	168	100%	36	1	1	0	0.03	0	0.12
2135460	ESEFRVYSSANNCTFEYVSQ	154	173	100%	1	1	1	0	1	0.04	1
1692728	SEFRVYSSANNCTFEY	155	170	100%	40	1	1	0	0.03	0	0.11
1394042	SEFRVYSSANNCTFEYV	155	171	100%	1	0	0	1	0	0	0.94
1619222	SEFRVYSSANNCTFEYVS	155	172	100%	32	0	0	2	0	0	0.09
1503098	SEFRVYSSANNC	155	166	100%	1	0	0	1	0	0	0.94
1542424	SEFRVYSSANNCTFE	155	169	100%	7	1	1	0	0.14	0.01	0.5
1862341	SEFRVYSSANNCTFEYVSQPF	155	175	100%	1	0	0	1	0	0	0.94
2116267	SEFRVYSSANNCTFEYVSQPFL	155	176	100%	36	2	1	0	0.06	0.01	0.16
2135562	SEFRVYSSANNCTFEYVSQP	155	174	100%	1	1	1	0	1	0.04	1
1310352	EFRVYSSANNCTFEY	156	170	100%	48	2	2	1	0.04	0.01	0.12
1653942	EFRVYSSANNCTFEYV	156	171	100%	43	0	0	2	0	0	0.06
1427254	EFRVYSSANNCT	156	167	100%	1	0	0	1	0	0	0.94
2135455	EFRVYSSANNCTFEYVSQPF	156	175	100%	1	1	1	0	1	0.04	1
1312488	FRVYSSANNCTFEYV	157	171	100%	89	2	2	1	0.02	0.01	0.08
1658578	FRVYSSANNCTFEYVS	157	172	100%	40	0	0	1	0	0	0.07
1435980	FRVYSSANNCTF	157	168	100%	18	12	1	1	0.67	0.45	0.84
2061006	FRVYSSANNCTFEYVSQPFLMDLEG	157	181	100%	1	0	0	1	0	0	0.94
1691774	RVYSSANNCTFEYVSQ	158	173	100%	40	2	1	0	0.05	0.01	0.14
1397414	RVYSSANQCTFEYVS	158	173	93.33%	1	1	1	0	1	0.04	1
1075111	VYSSANNCTFEY	159	170	100%	37	13	1	1	0.35	0.22	0.49
1327695	VYSSANNCTF	159	168	100%	30	6	2	3	0.2	0.09	0.35
1707383	VYSSANNCTFEYVSQP	159	174	100%	40	4	1	0	0.1	0.03	0.21
1543328	VYSSANNCTFEYVSQ	159	173	100%	7	1	1	0	0.14	0.01	0.5
1596504	VYSSANNCTFEYVSQPFLMDLEGKQGNFKN	159	188	100%	52	52	1	0	1	0.93	1
1710802	YSSANNCTFEYVSQPF	160	175	100%	40	0	0	1	0	0	0.07
2134368	YSSANNCTF	160	168	100%	1	1	1	0	1	0.04	1
2001412	YSSANNCTFEYVSQP	160	174	100%	36	1	1	0	0.03	0	0.12
1310820	SSANNCTFEYVSQPF	161	175	100%	138	8	6	4	0.06	0.03	0.11
1087731	SSANNCTFEYVSQPFLMD	161	178	100%	20	0	0	1	0	0	0.13
1333782	SSANNCTFEY	161	170	100%	13	6	1	0	0.46	0.22	0.7
1695454	SSANNCTFEYVSQPFL	161	176	100%	43	0	0	2	0	0	0.06
1392435	SSANNCTFEYVSQPFLMDLE	161	180	100%	3	1	1	2	0.33	0.01	0.85
1508891	SSANNCTFEYVSQPFLMDL	161	179	100%	1	1	1	0	1	0.04	1
2116009	SSANNCTFEYVSQPFLM	161	177	100%	1	1	1	0	1	0.04	1
1324274	SANNCTFEY	162	170	100%	11	5	4	0	0.45	0.2	0.72
1692100	SANNCTFEYVSQPFLM	162	177	100%	40	1	1	0	0.03	0	0.11
1394035	SANNCTFEYVSQPFLMD	162	178	100%	12	1	1	0	0.08	0	0.33
1618992	SANNCTFEYVSQPFLMDL	162	179	100%	32	9	2	0	0.28	0.15	0.43
1501813	SANNCTFEYVSQ	162	173	100%	1	0	0	1	0	0	0.94
2127292	SANNCTFEYVSQPFL	162	176	100%	1	0	0	1	0	0	0.94
1645465	ANNCTFEYVSQPFLMD	163	178	100%	40	0	0	1	0	0	0.07
1411283	ANNCTFEYVSQP	163	174	100%	18	4	2	0	0.22	0.08	0.43
1539540	ANNCTFEYVSQPFLM	163	177	100%	43	1	1	1	0.02	0	0.1
1309536	NNCTFEYVSQPFLMDLEGKQ	164	183	100%	120	1	1	0	0.01	0	0.05
1682943	NNCTFEYVSQPFLMDL	164	179	100%	40	0	0	1	0	0	0.07
1482464	NNCTFEYVSQPF	164	175	100%	1	0	0	1	0	0	0.94
1313194	NCTFEYVSQPFLMDL	165	179	100%	64	7	4	1	0.11	0.05	0.21
1681090	NCTFEYVSQPFLMDLE	165	180	100%	40	0	0	1	0	0	0.07
1873053	NCTFEYVSQPFLM	165	177	100%	1	1	1	0	1	0.04	1
1478989	NCTFEYVSQPFL	165	176	100%	1	0	0	1	0	0	0.94
1309110	CTFEYVSQPFLMDLE	166	180	100%	135	52	11	0	0.39	0.31	0.47
1074869	CTFEYVSQPFLM	166	177	100%	76	26	2	0	0.34	0.25	0.45
1648975	CTFEYVSQPFLMDLEG	166	181	100%	43	0	0	2	0	0	0.06
1972691	CTFEYVSQPFFMDLE	166	180	93.33%	1	1	1	0	1	0.04	1
2115994	CTFEYVSQPFLMDLEGK	166	182	100%	1	1	1	0	1	0.04	1
2144790	CTFEYVSQPFLMD	166	178	100%	2	1	1	0	0.5	0.02	0.97
1333951	TFEYVSQPFLM	167	177	100%	7	2	1	0	0.29	0.05	0.64
1330182	TFEYVSQPFLMDLEGK	167	182	100%	40	0	0	1	0	0	0.07
1397507	TFEYVSQPF	167	175	100%	7	0	0	2	0	0	0.33
1330176	TFEYVSQPFLMD	167	178	100%	1	0	0	1	0	0	0.94
1330180	TFEYVSQPFLMDLEG	167	181	100%	7	0	0	1	0	0	0.33
1597821	TFEYVSQPFLMDLEGKQGNFKNLRE	167	191	100%	7	0	0	1	0	0	0.33
1330178	TFEYVSQPFLMDLE	167	180	100%	42	40	2	0	0.95	0.86	0.99
1316355	FEYVSQPFLM	168	177	100%	5	2	1	0	0.4	0.08	0.8
1656711	FEYVSQPFLMDLEGKQ	168	183	100%	40	0	0	1	0	0	0.07
1312410	FEYVSQPFL	168	176	100%	1	1	1	0	1	0.04	1
1087507	EYVSQPFLMDLEGKQGNF	169	186	100%	52	5	1	2	0.1	0.04	0.21
1316287	EYVSQPFLM	169	177	100%	42	2	2	3	0.05	0.01	0.14
1312390	EYVSQPFLMDLEGKQ	169	183	100%	98	5	3	1	0.05	0.02	0.11
1655988	EYVSQPFLMDLEGKQG	169	184	100%	20	1	1	0	0.05	0	0.21
1393760	EYVSQPFLMDLEGKQGN	169	185	100%	1	0	0	1	0	0	0.94
1329375	EYVSQPFLMDLE	169	180	100%	18	2	1	1	0.11	0.02	0.3
2116181	EYVSQPFLMDLEGKQGNFKNLR	169	190	100%	36	4	1	0	0.11	0.04	0.23
1711316	YVSQPFLMDLEGKQGN	170	185	100%	40	0	0	1	0	0	0.07
1972729	YVSQPFLM	170	177	100%	1	1	1	0	1	0.04	1
1310922	VSQPFLMDLEGKQGN	171	185	100%	93	5	4	4	0.05	0.02	0.12
1706003	VSQPFLMDLEGKQGNF	171	186	100%	23	1	1	1	0.04	0	0.18
1392503	VSQPFLMDLEGKQGNFKNLR	171	190	100%	77	3	1	2	0.04	0.01	0.11
1529232	VSQPFLMDLEGK	171	182	100%	1	1	1	0	1	0.04	1
1862686	VSQPFLMDLEGKQGNFKNLRE	171	191	100%	1	0	0	1	0	0	0.94
1388968	SQPFLMDLEGKQGNFK	172	187	100%	40	3	1	0	0.08	0.02	0.18
1508228	SQPFLMDLEGKQ	172	183	100%	1	0	0	1	0	0	0.94
2001317	SQPFLMDLEGKQGNF	172	186	100%	37	1	1	1	0.03	0	0.12
2061115	SQPFLMDLEGKQGNFKNLREFVFK	172	195	100%	1	0	0	1	0	0	0.94
1313368	QPFLMDLEGKQGNFK	173	187	100%	53	0	0	2	0	0	0.07
1688588	QPFLMDLEGKQGNFKN	173	188	100%	40	9	1	0	0.23	0.12	0.35
1494233	QPFLMDLEGKQG	173	184	100%	1	0	0	1	0	0	0.94
1309546	PFLMDLEGKQGNFKNLREFV	174	193	100%	120	2	1	0	0.02	0	0.06
1685148	PFLMDLEGKQGNFKNL	174	189	100%	40	5	1	0	0.13	0.05	0.24
1486790	PFLMDLEGKQGN	174	185	100%	1	1	1	0	1	0.04	1
1657813	FLMDLEGKQGNFKNLR	175	190	100%	40	6	1	0	0.15	0.07	0.27
1434429	FLMDLEGKQGNF	175	186	100%	18	1	1	1	0.06	0	0.23
1540287	FLMDLEGKQGNFKNL	175	189	100%	43	3	2	0	0.07	0.02	0.17
1310603	LMDLEGKQGNFKNLR	176	190	100%	128	9	4	3	0.07	0.04	0.13
1676337	LMDLEGKQGNFKNLRE	176	191	100%	43	7	1	1	0.16	0.08	0.28
1393903	LMDLEGKQGNFKNLREF	176	192	100%	1	0	0	1	0	0	0.94
1612907	LMDLEGKQGNFKNLREFV	176	193	100%	32	0	0	2	0	0	0.09
1087631	MDLEGKQGNFKNLREFVF	177	194	100%	20	0	0	1	0	0	0.13
1313147	MDLEGKQGNFKNLRE	177	191	100%	53	1	1	1	0.02	0	0.1
1679499	MDLEGKQGNFKNLREF	177	192	100%	40	4	1	0	0.1	0.03	0.21
1475895	MDLEGKQGNFKN	177	188	100%	1	0	0	1	0	0	0.94
1651300	DLEGKQGNFKNLREFV	178	193	100%	40	8	1	0	0.2	0.1	0.33
2001016	DLEGKQGNFKNLREF	178	192	100%	36	3	1	0	0.08	0.02	0.2
1673966	LEGKQGNFKNLREFVF	179	194	100%	40	5	1	0	0.13	0.05	0.24
1465435	LEGKQGNFKNLR	179	190	100%	1	0	0	1	0	0	0.94
1541247	LEGKQGNFKNLREFV	179	193	100%	7	1	1	0	0.14	0.01	0.5
1654067	EGKQGNFKNLREFVFK	180	195	100%	40	2	1	0	0.05	0.01	0.14
1625368	EGKQGNFKNLR	180	190	100%	20	3	1	0	0.15	0.04	0.33
1069822	GKQGNFKNLREFVFK	181	195	100%	177	6	4	8	0.03	0.02	0.07
1661579	GKQGNFKNLREFVFKN	181	196	100%	43	2	1	1	0.05	0.01	0.13
1392181	GKQGNFKNLREFVFKNIDGY	181	200	100%	2	0	0	2	0	0	0.76
2134885	G181, K182, N211	181	211	100%	1	1	1	0	1	0.04	1
1441544	GKQGNFKNLREF	181	192	100%	18	11	1	1	0.61	0.39	0.79
1671745	KQGNFKNLREFVFKNI	182	197	100%	40	1	1	0	0.03	0	0.11
2132141	KQGNFKNLREFVFKN	182	196	100%	1	0	0	1	0	0	0.94
1687827	QGNFKNLREFVFKNID	183	198	100%	40	1	1	0	0.03	0	0.11
1394004	QGNFKNLREFVFKNIDG	183	199	100%	1	0	0	1	0	0	0.94
2134958	Q183	183	183	100%	1	1	1	0	1	0.04	1
1616242	QGNFKNLREFVFKNIDGY	183	200	100%	32	0	0	2	0	0	0.09
1542106	QGNFKNLREFVFKNI	183	197	100%	7	0	0	1	0	0	0.33
2116258	QGNFKNLREFVFKNIDGYFKIY	183	204	100%	36	2	1	0	0.06	0.01	0.16
1309478	GNFKNLREFVFKNIDGYFKI	184	203	100%	120	19	1	0	0.16	0.1	0.23
1662085	GNFKNLREFVFKNIDG	184	199	100%	20	2	1	0	0.1	0.02	0.27
1595740	GNFKNLREFVFKNIDGYFKIYSKHTPINLV	184	213	100%	52	50	1	0	0.96	0.87	0.99
2001077	GNFKNLREFVFKNID	184	198	100%	36	1	1	0	0.03	0	0.12
2061014	GNFKNLREFVFKNIDGYFKIYSKH	184	207	100%	1	0	0	1	0	0	0.94
1087652	NFKNLREFVFKNIDGYFK	185	202	100%	20	0	0	1	0	0	0.13
1313201	NFKNLREFVFKNIDG	185	199	100%	53	0	0	2	0	0	0.07
1681520	NFKNLREFVFKNIDGY	185	200	100%	20	2	1	0	0.1	0.02	0.27
1868040	NFKNLREFVFKNIDGYFKIY	185	204	100%	1	1	1	0	1	0.04	1
1310403	FKNLREFVFKNIDGY	186	200	100%	53	1	1	2	0.02	0	0.1
1331958	FKNLREFVF	186	194	100%	6	1	1	0	0.17	0.01	0.56
1331959	FKNLREFVFKNIDGYFKIYSKHTPINLVRD	186	215	100%	55	1	1	0	0.02	0	0.1
1657518	FKNLREFVFKNIDGYF	186	201	100%	43	0	0	2	0	0	0.06
1070789	KNLREFVFKNIDGYF	187	201	100%	30	4	2	1	0.13	0.05	0.27
1671379	KNLREFVFKNIDGYFK	187	202	100%	40	0	0	1	0	0	0.07
2134895	K187, V213, R214	187	214	100%	1	1	1	0	1	0.04	1
1460669	KNLREFVFKNID	187	198	100%	18	0	0	2	0	0	0.15
1671378	KNLREFVFK	187	195	100%	3	1	1	0	0.33	0.01	0.85
1861759	KNLREFVFKNIDGYFKIYSKH	187	207	100%	1	0	0	1	0	0	0.94
1682722	NLREFVFKNIDGYFKI	188	203	100%	40	0	0	1	0	0	0.07
2135523	NLREFVFKNIDGYFKIYSKH	188	207	100%	1	1	1	0	1	0.04	1
1313075	LREFVFKNIDGYFKI	189	203	100%	53	0	0	2	0	0	0.07
1677395	LREFVFKNIDGYFKIY	189	204	100%	40	0	0	1	0	0	0.07
1471755	LREFVFKNIDGYFKIYSKHTPINLVRD	189	215	100%	1	1	1	0	1	0.04	1
1471754	LREFVFKNIDGY	189	200	100%	1	1	1	0	1	0.04	1
1329995	REFVFKNIDGYFKIYS	190	205	100%	40	0	0	1	0	0	0.07
1329996	REFVFKNIDGYFKIYSK	190	206	100%	12	1	1	0	0.08	0	0.33
1617118	REFVFKNIDGYFKIYSKH	190	207	100%	32	2	1	1	0.06	0.01	0.18
1497124	REFVFKNIDGYF	190	201	100%	1	1	1	0	1	0.04	1
1597484	R190	190	190	100%	24	10	1	0	0.42	0.25	0.59
1597794	REFVFKNIDGYFKIYSKHTP	190	209	100%	75	3	1	0	0.04	0.01	0.11
1329994	REFVFKNIDGYFKIY	190	204	100%	22	2	1	0	0.09	0.02	0.25
1309113	EFVFKNIDGYFKIYS	191	205	100%	134	11	8	3	0.08	0.05	0.14
1329334	EFVFKNIDGYFKIYSK	191	206	100%	43	0	0	2	0	0	0.06
1392127	EFVFKNIDGYFKIYSKHTPI	191	210	100%	2	0	0	2	0	0	0.76
1329331	EFVFKNIDGYFK	191	202	100%	1	0	0	1	0	0	0.94
1074900	FVFKNIDGY	192	200	100%	43	4	2	1	0.09	0.03	0.2
1659236	FVFKNIDGYFKIYSKH	192	207	100%	40	0	0	1	0	0	0.07
1437216	FVFKNIDGYFKI	192	203	100%	1	1	1	0	1	0.04	1
1597692	FVFKNIDGYFKIYSKHTPINLVRDL	192	216	100%	7	0	0	1	0	0	0.33
2131535	FVFKNIDGYFKIYSK	192	206	100%	1	0	0	1	0	0	0.94
1087770	VFKNIDGYFKIYSKHTPI	193	210	100%	20	0	0	1	0	0	0.13
1326409	VFKNIDGYF	193	201	100%	26	4	4	0	0.15	0.05	0.31
1313847	VFKNIDGYFKIYSKH	193	207	100%	75	1	1	2	0.01	0	0.07
1702800	VFKNIDGYFKIYSKHT	193	208	100%	40	0	0	1	0	0	0.07
1523325	VFKNIDGYFKIY	193	204	100%	18	17	1	1	0.94	0.76	1
1870234	VFKNIDGYFKIYSKHTPINL	193	212	100%	1	1	1	0	1	0.04	1
1309470	FKNIDGYFKIYSKHTPINLV	194	213	100%	120	3	1	0	0.03	0.01	0.07
1657516	FKNIDGYFKIYSKHTP	194	209	100%	40	0	0	1	0	0	0.07
1433939	FKNIDGYFKIYS	194	205	100%	1	1	1	0	1	0.04	1
1332509	KNIDGYFKIY	195	204	100%	7	1	1	0	0.14	0.01	0.5
1671346	KNIDGYFKIYSKHTPI	195	210	100%	40	0	0	1	0	0	0.07
1541079	KNIDGYFKIYSKHTP	195	209	100%	7	0	0	1	0	0	0.33
1310664	NIDGYFKIYSKHTPI	196	210	100%	102	18	7	0	0.18	0.11	0.26
1329806	NIDGYFKIYSKHTPIN	196	211	100%	43	0	0	2	0	0	0.06
1312689	IDGYFKIYSKHTPIN	197	211	100%	67	7	2	2	0.1	0.05	0.2
1329569	IDGYFKIYSKHTPINL	197	212	100%	40	0	0	1	0	0	0.07
1872258	IDGYFKIYSKHTP	197	209	100%	1	1	1	0	1	0.04	1
1393831	IDGYFKIYSKHTPINLV	197	213	100%	1	0	0	1	0	0	0.94
1607628	IDGYFKIYSKHTPINLVR	197	214	100%	32	1	1	1	0.03	0	0.13
1449978	IDGYFKIYSKHT	197	208	100%	1	0	0	1	0	0	0.94
2116207	IDGYFKIYSKHTPINLVRDLPQ	197	218	100%	1	1	1	0	1	0.04	1
1650736	DGYFKIYSKHTPINLV	198	213	100%	40	0	0	1	0	0	0.07
1330432	DGYFKIYSKHTPINL	198	212	100%	15	5	1	0	0.33	0.14	0.57
1421312	DGYFKIYSKHTP	198	209	100%	1	0	0	1	0	0	0.94
2060980	DGYFKIYSKHTPINLVRDLPQGFSA	198	222	100%	1	0	0	1	0	0	0.94
2134026	DGYFKIYSKHT	198	208	100%	2	1	1	0	0.5	0.02	0.97
1663825	GYFKIYSKHTPINLVR	199	214	100%	40	0	0	1	0	0	0.07
1329533	GYFKIYSKHTPI	199	210	100%	18	2	1	1	0.11	0.02	0.3
1540648	GYFKIYSKHTPINLV	199	213	100%	43	6	1	1	0.14	0.06	0.25
1330367	YFKIYSKHTPINLVRD	200	215	100%	40	0	0	1	0	0	0.07
1534471	YFKIYSKHTPIN	200	211	100%	1	0	0	1	0	0	0.94
1330368	YFKIYSKHTPINLVRDLPQ	200	218	100%	2	1	1	0	0.5	0.02	0.97
1310401	FKIYSKHTPINLVRD	201	215	100%	141	10	5	5	0.07	0.04	0.13
1087514	FKIYSKHTPINLVRDLPQ	201	218	100%	20	0	0	1	0	0	0.13
1657460	FKIYSKHTPINLVRDL	201	216	100%	43	0	0	2	0	0	0.06
1392150	FKIYSKHTPINLVRDLPQGF	201	220	100%	3	1	1	2	0.33	0.01	0.85
1657458	FKIYSKHTPI	201	210	100%	3	1	1	0	0.33	0.01	0.85
1319559	KIYSKHTPI	202	210	100%	5	1	1	0	0.2	0.01	0.64
1670623	KIYSKHTPINLVRDLP	202	217	100%	40	0	0	1	0	0	0.07
1459267	KIYSKHTPINLV	202	213	100%	1	0	0	1	0	0	0.94
2001148	KIYSKHTPINLVRDL	202	216	100%	37	7	1	1	0.19	0.09	0.32
2061044	KIYSKHTPIIVREPEDLPQG	202	219	70%	7	1	1	0	0.14	0.01	0.5
2061045	KIYSKHTPINLVRDLPQGFS	202	221	100%	7	2	1	0	0.29	0.05	0.64
1074945	IYSKHTPINL	203	212	100%	39	8	1	1	0.21	0.11	0.33
1669033	IYSKHTPINLVRDLPQ	203	218	100%	40	0	0	1	0	0	0.07
1540918	IYSKHTPINLVRDLP	203	217	100%	7	1	1	0	0.14	0.01	0.5
1861679	IYSKHTPINLVRDLPQGFSAL	203	223	100%	1	0	0	1	0	0	0.94
1309621	YSKHTPINLVRDLPQGFSAL	204	223	100%	120	2	1	0	0.02	0	0.06
1710719	YSKHTPINLVRDLPQG	204	219	100%	40	1	1	0	0.03	0	0.11
1394175	YSKHTPINLVRDLPQGF	204	220	100%	1	0	0	1	0	0	0.94
1625152	YSKHTPINLVRDLPQGFS	204	221	100%	32	2	1	1	0.06	0.01	0.18
1537623	YSKHTPINLVRD	204	215	100%	1	0	0	1	0	0	0.94
1625153	YSKHTPINLVRDLPQGFSALEPLVDLPIGINITRFQ	204	239	100%	1	1	1	0	1	0.04	1
1072807	SKHTPINLVRDLPQG	205	219	100%	53	13	3	2	0.25	0.15	0.38
1693933	SKHTPINLVRDLPQGF	205	220	100%	40	0	0	1	0	0	0.07
1505607	SKHTPINLVRDL	205	216	100%	18	17	1	1	0.94	0.76	1
1309123	KHTPINLVRDLPQGF	206	220	100%	92	12	5	1	0.13	0.08	0.21
1670412	KHTPINLVRDLPQGFS	206	221	100%	43	0	0	2	0	0	0.06
1458857	KHTPINLVRDLP	206	217	100%	1	0	0	1	0	0	0.94
1625393	KHTPINLVRDLPQGFSA	206	222	100%	20	6	1	0	0.3	0.14	0.5
1665093	HTPINLVRDLPQGFSA	207	222	100%	40	0	0	1	0	0	0.07
1329551	HTPINLVRDLPQ	207	218	100%	1	0	0	1	0	0	0.94
1329552	HTPINLVRDLPQGF	207	220	100%	1	1	1	0	1	0.04	1
1540724	HTPINLVRDLPQGFS	207	221	100%	9	2	1	1	0.22	0.04	0.54
1972970	HTPINLVR	207	214	100%	1	1	1	0	1	0.04	1
2134439	HTPIIVREPEDLPQG	207	219	60%	2	1	1	0	0.5	0.02	0.97
1075079	TPINLVRDL	208	216	100%	66	4	4	2	0.06	0.02	0.15
1699711	TPINLVRDLPQGFSAL	208	223	100%	40	2	1	0	0.05	0.01	0.14
1330220	TPINLVRDLPQG	208	219	100%	1	0	0	1	0	0	0.94
1330624	TPINLVRDLPQGFSA	208	222	100%	36	7	1	0	0.19	0.09	0.33
1087680	PINLVRDLPQGFSALEPL	209	226	100%	1	1	1	0	1	0.04	1
1313285	PINLVRDLPQGFSAL	209	223	100%	12	3	2	1	0.25	0.07	0.52
1313286	PINLVRDLPQGFWAL	209	223	93.33%	1	1	1	0	1	0.04	1
1685526	PINLVRDLPQGFSALE	209	224	100%	40	0	0	1	0	0	0.07
1873165	PINLVRDLPQGFS	209	221	100%	1	1	1	0	1	0.04	1
1596139	PINLVRDLPQGFSALEPLVDLPIGINITR	209	237	100%	52	47	1	0	0.9	0.79	0.96
1868297	PINLVRDLPQGFSALEPLVD	209	228	100%	1	1	1	0	1	0.04	1
1667473	INLVRDLPQGFSALEP	210	225	100%	40	0	0	1	0	0	0.07
1453240	INLVRDLPQGFS	210	221	100%	4	1	1	1	0.25	0.01	0.74
1071585	NLVRDLPQGFSALEP	211	225	100%	158	16	8	4	0.1	0.06	0.16
1682809	NLVRDLPQGFSALEPL	211	226	100%	43	0	0	2	0	0	0.06
1393954	NLVRDLPQGFSALEPLV	211	227	100%	2	1	1	1	0.5	0.02	0.97
1392328	NLVRDLPQGFSALEPLVDLP	211	230	100%	3	3	3	0	1	0.37	1
1615090	NLVRDLPQGFSALEPLVD	211	228	100%	32	2	1	1	0.06	0.01	0.18
1482187	NLVRDLPQGFSA	211	222	100%	18	1	1	1	0.06	0	0.23
2116236	NLVRDLPQGFSALEPLVDLPIG	211	232	100%	1	1	1	0	1	0.04	1
1678799	LVRDLPQGFSALEPLV	212	227	100%	40	0	0	1	0	0	0.07
1474503	LVRDLPQGFSAL	212	223	100%	1	0	0	1	0	0	0.94
2061060	LVRDLPQGFSALEPLVDLPIGI	212	233	100%	1	0	0	1	0	0	0.94
2150183	LVRDLPQGF	212	220	100%	2	0	0	1	0	0	0.76
2132492	LVRDLPQGFSALEPL	212	226	100%	1	0	0	1	0	0	0.94
1313917	VRDLPQGFSALEPLV	213	227	100%	53	0	0	2	0	0	0.07
1705548	VRDLPQGFSALEPLVD	213	228	100%	40	0	0	1	0	0	0.07
2135017	V213, R214	213	214	100%	1	1	1	0	1	0.04	1
1528359	VRDLPQGFSALE	213	224	100%	1	0	0	1	0	0	0.94
1309567	RDLPQGFSALEPLVDLPIGI	214	233	100%	120	2	1	0	0.02	0	0.06
1689835	RDLPQGFSALEPLVDL	214	229	100%	40	0	0	1	0	0	0.07
1496938	RDLPQGFSALEP	214	225	100%	1	0	0	1	0	0	0.94
2001275	RDLPQGFSALEPLVD	214	228	100%	36	2	1	0	0.06	0.01	0.16
1651468	DLPQGFSALEPLVDLP	215	230	100%	40	0	0	1	0	0	0.07
1422541	DLPQGFSALEPL	215	226	100%	1	1	1	0	1	0.04	1
1539917	DLPQGFSALEPLVDL	215	229	100%	7	1	1	0	0.14	0.01	0.5
1597473	D215	215	215	100%	24	8	1	0	0.33	0.18	0.51
1310612	LPQGFSALEPLVDLP	216	230	100%	57	6	4	0	0.11	0.05	0.21
1074981	LPQGFSAL	216	223	100%	80	6	3	2	0.08	0.03	0.15
1332697	LPQGFSALEPL	216	226	100%	7	1	1	0	0.14	0.01	0.5
1329717	LPQGFSALEPLVDLPI	216	231	100%	43	0	0	2	0	0	0.06
1071794	PQGFSALEPLVDLPI	217	231	100%	90	3	1	3	0.03	0.01	0.09
1087686	PQGFSALEPLVDLPIGIN	217	234	100%	20	0	0	1	0	0	0.13
1686329	PQGFSALEPLVDLPIG	217	232	100%	40	0	0	1	0	0	0.07
1489300	PQGFSALEPLVD	217	228	100%	18	14	2	0	0.78	0.56	0.92
1597782	PQGFSALEPLVDLPIGINITRFQTL	217	241	100%	7	7	1	0	1	0.65	1
1687770	QGFSALEPLVDLPIGI	218	233	100%	40	0	0	1	0	0	0.07
1394003	QGFSALEPLVDLPIGIN	218	234	100%	1	0	0	1	0	0	0.94
1616228	QGFSALEPLVDLPIGINI	218	235	100%	32	0	0	2	0	0	0.09
1492477	QGFSALEPLVDL	218	229	100%	1	0	0	1	0	0	0.94
1660788	GFSALEPLVDLPIGIN	219	234	100%	40	0	0	1	0	0	0.07
1392174	GFSALEPL	219	226	100%	1	1	1	0	1	0.04	1
1440005	GFSALEPLVDLP	219	230	100%	1	1	1	0	1	0.04	1
1540450	GFSALEPLVDLPIGI	219	233	100%	7	1	1	0	0.14	0.01	0.5
1597699	GFSALEPLVDLPIGINITRF	219	238	100%	75	0	0	1	0	0	0.05
1658586	FSALEPLVDLPIGINI	220	235	100%	40	0	0	1	0	0	0.07
1436008	FSALEPLVDLPI	220	231	100%	1	1	1	0	1	0.04	1
2001062	FSALEPLVDLPIGIN	220	234	100%	36	4	1	0	0.11	0.04	0.23
1310785	SALEPLVDLPIGINI	221	235	100%	132	5	4	5	0.04	0.02	0.09
1692051	SALEPLVDLPIGINIT	221	236	100%	43	0	0	2	0	0	0.06
1388073	SALEPLVDLPIGINITRFQTLLALH	221	245	100%	1	1	1	0	1	0.04	1
1392412	SALEPLVDLPIGINITRFQT	221	240	100%	2	1	1	1	0.5	0.02	0.97
1644874	ALEPLVDLPIGINITR	222	237	100%	40	0	0	1	0	0	0.07
2060957	ALEPLVDLPIGINITRFQTLLALHR	222	246	100%	1	0	0	1	0	0	0.94
2130875	ALEPLVDLPIGINIT	222	236	100%	1	1	1	0	1	0.04	1
1074967	LEPLVDLPI	223	231	100%	36	1	1	0	0.03	0	0.12
1674063	LEPLVDLPIGINITRF	223	238	100%	40	0	0	1	0	0	0.07
1465587	LEPLVDLPIGIN	223	234	100%	18	2	2	0	0.11	0.02	0.3
1541254	LEPLVDLPIGINITR	223	237	100%	43	4	2	0	0.09	0.03	0.2
1309462	EPLVDLPIGINITRFQTLLA	224	243	100%	120	9	1	0	0.08	0.04	0.14
1315940	EPLVDLPI	224	231	100%	4	1	1	0	0.25	0.01	0.74
1655044	EPLVDLPIGINITRFQ	224	239	100%	20	1	1	0	0.05	0	0.21
1429207	EPLVDLPIGINI	224	235	100%	1	0	0	1	0	0	0.94
1087683	PLVDLPIGINITRFQTLL	225	242	100%	52	0	0	3	0	0	0.07
1313291	PLVDLPIGINITRFQ	225	239	100%	53	1	1	1	0.02	0	0.1
1686001	PLVDLPIGINITRFQT	225	240	100%	40	1	1	0	0.03	0	0.11
1393986	PLVDLPIGINITRFQTL	225	241	100%	1	0	0	1	0	0	0.94
1868318	PLVDLPIGINITRFQTLLAL	225	244	100%	1	1	1	0	1	0.04	1
2116255	PLVDLPIGINITRFQTLLALHR	225	246	100%	36	0	0	1	0	0	0.08
1310625	LVDLPIGINITRFQT	226	240	100%	82	3	2	2	0.04	0.01	0.1
1678546	LVDLPIGINITRFQTL	226	241	100%	43	0	0	2	0	0	0.06
1474019	LVDLPIGINITR	226	237	100%	1	1	1	0	1	0.04	1
1702218	VDLPIGINITRFQTLL	227	242	100%	40	0	0	1	0	0	0.07
1397452	VDLPIGIQITRFQTL	227	241	93.33%	1	1	1	0	1	0.04	1
1543029	VDLPIGINITRFQTL	227	241	100%	7	0	0	1	0	0	0.33
1074872	DLPIGINITRFQTL	228	241	100%	36	4	1	0	0.11	0.04	0.23
1651463	DLPIGINITRFQTLLA	228	243	100%	40	0	0	1	0	0	0.07
1321058	LPIGINITRF	229	238	100%	14	2	2	0	0.14	0.03	0.37
1313051	LPIGINITRFQTLLA	229	243	100%	89	3	2	1	0.03	0.01	0.09
1676909	LPIGINITRFQTLLAL	229	244	100%	40	0	0	1	0	0	0.07
1470841	LPIGINITRFQT	229	240	100%	18	6	1	1	0.33	0.16	0.54
1685471	PIGINITRFQTLLALH	230	245	100%	40	0	0	1	0	0	0.07
1392354	PIGINITRF	230	238	100%	1	1	1	0	1	0.04	1
1310487	IGINITRFQTLLALH	231	245	100%	100	10	7	2	0.1	0.06	0.17
1666306	IGINITRFQTLLALHR	231	246	100%	43	0	0	2	0	0	0.06
1392217	IGINITRFQTLLALHRSYLT	231	250	100%	2	1	1	1	0.5	0.02	0.97
1661379	GINITRFQTLLALHRS	232	247	100%	40	0	0	1	0	0	0.07
1354273	GINITRFQTLLALHRSY	232	248	100%	2	1	1	1	0.5	0.02	0.97
1605379	GINITRFQTLLALHRSYL	232	249	100%	32	1	1	1	0.03	0	0.13
1441126	GINITRFQTLLA	232	243	100%	1	1	1	0	1	0.04	1
2001075	GINITRFQTLLALHR	232	246	100%	37	5	1	1	0.14	0.05	0.26
1087562	INITRFQTLLALHRSYLT	233	250	100%	20	0	0	1	0	0	0.13
1318821	INITRFQTL	233	241	100%	5	1	1	0	0.2	0.01	0.64
1312746	INITRFQTLLALHRS	233	247	100%	53	1	1	1	0.02	0	0.1
1667440	INITRFQTLLALHRSY	233	248	100%	40	0	0	1	0	0	0.07
1872350	INITRFQTLLALH	233	245	100%	1	1	1	0	1	0.04	1
1866712	INITRFQTLLALHRSYLTPG	233	252	100%	1	1	1	0	1	0.04	1
1309534	NITRFQTLLALHRSYLTPGD	234	253	100%	195	3	2	0	0.02	0.01	0.04
1322395	NITRFQTL	234	241	100%	5	1	1	0	0.2	0.01	0.64
1682232	NITRFQTLLALHRSYL	234	249	100%	40	0	0	1	0	0	0.07
2134935	N234	234	234	100%	1	1	1	0	1	0.04	1
1596090	NITRFQTLLALHRSYLTPGDSSSGWTAGAA	234	263	100%	52	52	1	0	1	0.93	1
1310513	ITRFQTLLALHRSYL	235	249	100%	119	67	5	0	0.56	0.47	0.65
1668466	ITRFQTLLALHRSYLT	235	250	100%	40	0	0	1	0	0	0.07
1455312	ITRFQTLLALHR	235	246	100%	18	0	0	2	0	0	0.15
1668465	ITRFQTLLA	235	243	100%	3	0	0	1	0	0	0.61
1857985	ITRFQTLHALHISYL	235	250	86.67%	4	3	1	0	0.75	0.25	0.99
1857986	ITRFQTLHALHRSYL	235	249	93.33%	4	3	1	0	0.75	0.25	0.99
1857987	ITRFQTLLALHISYL	235	249	93.33%	4	3	1	0	0.75	0.25	0.99
2061036	ITRFQTLLALHRSYLTPGDSSSGWT	235	259	100%	1	0	0	1	0	0	0.94
1310865	TRFQTLLALHRSYLT	236	250	100%	76	21	6	1	0.28	0.19	0.39
1700030	TRFQTLLALHRSYLTP	236	251	100%	43	0	0	2	0	0	0.06
1518333	TRFQTLLALHRS	236	247	100%	3	2	1	1	0.67	0.14	0.98
1860144	TRFQTLLAL	236	244	100%	30	14	1	0	0.47	0.31	0.62
1835518	TRFQTLLALHRSYLTPGDSSS	236	256	100%	13	12	1	1	0.92	0.68	1
1313423	RFQTLLALHRSYLTP	237	251	100%	53	0	0	2	0	0	0.07
1690080	RFQTLLALHRSYLTPG	237	252	100%	40	0	0	1	0	0	0.07
1497442	RFQTLLALHRSY	237	248	100%	1	0	0	1	0	0	0.94
2135541	RFQTLLALHRSYLTPGDSSS	237	256	100%	1	1	1	0	1	0.04	1
1658457	FQTLLALHRSYLTPGD	238	253	100%	40	0	0	1	0	0	0.07
1435744	FQTLLALHRSYL	238	249	100%	1	0	0	1	0	0	0.94
1329417	FQTLLALHRSYLTPG	238	252	100%	36	4	1	0	0.11	0.04	0.23
1689127	QTLLALHRSYLTPGDS	239	254	100%	40	0	0	1	0	0	0.07
1394016	QTLLALHRSYLTPGDSS	239	255	100%	16	6	1	1	0.38	0.18	0.6
1616685	QTLLALHRSYLTPGDSSS	239	256	100%	32	0	0	2	0	0	0.09
1495508	QTLLALHRSYLT	239	250	100%	1	0	0	1	0	0	0.94
1542193	QTLLALHRSYLTPGD	239	253	100%	7	1	1	0	0.14	0.01	0.5
2116260	QTLLALHRSYLTPGDSSSGWTA	239	260	100%	1	1	1	0	1	0.04	1
2134243	QTLLALHRSYL	239	249	100%	3	2	1	0	0.67	0.14	0.98
1075077	TLLALHRSYLTPGDSSSGWTAGAAAYYVGYLQPRTFLLKYNEN	240	282	100%	4	2	1	0	0.5	0.1	0.89
1699067	TLLALHRSYLTPGDSS	240	255	100%	40	1	1	0	0.03	0	0.11
1860045	TLLALHRSY	240	248	100%	22	7	1	0	0.32	0.16	0.51
1310592	LLALHRSYLTPGDSS	241	255	100%	171	19	5	4	0.11	0.07	0.17
1074974	LLALHRSYL	241	249	100%	68	26	3	0	0.38	0.28	0.5
1087612	LLALHRSYLTPGDSSSGW	241	258	100%	20	0	0	1	0	0	0.13
1384629	LLALHRSYLTPGDSSS	241	256	100%	43	1	1	1	0.02	0	0.1
1392269	LLALHRSYLTPGDSSSGWTA	241	260	100%	2	1	1	1	0.5	0.02	0.97
1468599	LLALHRSYLTPG	241	252	100%	18	2	1	1	0.11	0.02	0.3
1347906	L242, A243, L244, E484	242	484	100%	20	1	1	0	0.05	0	0.21
1673173	LALHRSYLTPGDSSSG	242	257	100%	40	3	1	0	0.08	0.02	0.18
1397520	L242, A243, L244	242	244	100%	10	6	1	0	0.6	0.3	0.84
1464013	LALHRSYLTPGD	242	253	100%	1	1	1	0	1	0.04	1
1464014	LALHRSYLTPGDSSSGWT	242	259	100%	1	1	1	0	1	0.04	1
1597480	L242, A243, L244	242	244	100%	24	12	1	0	0.5	0.32	0.67
2134921	L242, A243, L244	242	244	100%	1	1	1	0	1	0.04	1
1597725	LALHRSYLTPGDSSSGWTAGAAAYY	242	266	100%	7	6	1	0	0.86	0.48	0.99
1972666	L242, A243, L244	242	244	100%	23	5	1	0	0.22	0.09	0.4
2132218	LALHRSYLTPGDSSS	242	256	100%	15	1	1	0	0.07	0	0.27
1334452	ALHRSYLTPGDSSSG	243	257	100%	27	5	1	1	0.19	0.07	0.34
1644919	ALHRSYLTPGDSSSGW	243	258	100%	40	1	1	0	0.03	0	0.11
1410282	ALHRSYLTPGDS	243	254	100%	1	0	0	1	0	0	0.94
1309515	LHRSYLTPGDSSSGWTAGAA	244	263	100%	120	0	0	1	0	0	0.03
1674910	LHRSYLTPGDSSSGWT	244	259	100%	40	1	1	0	0.03	0	0.11
1467213	LHRSYLTPGDSS	244	255	100%	1	0	0	1	0	0	0.94
2001179	LHRSYLTPGDSSSGW	244	258	100%	36	2	1	0	0.06	0.01	0.16
1312663	HRSYLTPGDSSSGWT	245	259	100%	53	0	0	2	0	0	0.07
1664902	HRSYLTPGDSSSGWTA	245	260	100%	40	2	1	0	0.05	0.01	0.14
1448101	HRSYLTPGDSSS	245	256	100%	1	1	1	0	1	0.04	1
2135487	HRSYLTPGDSSSGWTAGAAA	245	264	100%	1	1	1	0	1	0.04	1
1310775	RSYLTPGDSSSGWTA	246	260	100%	51	1	1	2	0.02	0	0.1
1691420	RSYLTPGDSSSGWTAG	246	261	100%	43	4	1	1	0.09	0.03	0.2
1394031	RSYLTPGDSSSGWTAGA	246	262	100%	1	0	0	1	0	0	0.94
1618573	RSYLTPGDSSSGWTAGAA	246	263	100%	32	0	0	2	0	0	0.09
1597485	R246	246	246	100%	24	8	1	0	0.33	0.18	0.51
1696835	SYLTPGDSSSGWTAGA	247	262	100%	40	4	1	0	0.1	0.03	0.21
1511886	SYLTPGDSSSGW	247	258	100%	18	2	2	0	0.11	0.02	0.3
1542656	SYLTPGDSSSGWTAG	247	261	100%	43	4	2	0	0.09	0.03	0.2
1862469	SYLTPGDSSSGWTAGAAAYYVGYLQPRTFL	247	276	100%	1	0	0	1	0	0	0.94
1709994	YLTPGDSSSGWTAGAA	248	263	100%	40	7	1	0	0.18	0.08	0.3
1391530	YLTPGDSSSGWTAGAAAYYV	248	267	100%	4	4	2	0	1	0.47	1
1536271	YLTPGDSSSGWT	248	259	100%	1	1	1	0	1	0.04	1
1625466	YLTPGDSSSGWTA	248	260	100%	20	4	1	0	0.2	0.07	0.39
1973003	YLTPGDSS	248	255	100%	1	1	1	0	1	0.04	1
2061148	YLTPGDSSSGWTAGAAAYYVGYLQP	248	272	100%	1	0	0	1	0	0	0.94
1087626	LTPGDSSSGWTAGAAAYY	249	266	100%	20	0	0	1	0	0	0.13
1313106	LTPGDSSSGWTAGAA	249	263	100%	53	0	0	2	0	0	0.07
1678335	LTPGDSSSGWTAGAAA	249	264	100%	40	6	1	0	0.15	0.07	0.27
1473607	LTPGDSSSGWTA	249	260	100%	1	1	1	0	1	0.04	1
1699682	TPGDSSSGWTAGAAAY	250	265	100%	40	0	0	1	0	0	0.07
1517549	TPGDSSSGWTAG	250	261	100%	1	1	1	0	1	0.04	1
1330219	TPGDSSSGWTAGAAA	250	264	100%	36	3	1	0	0.08	0.02	0.2
1310714	PGDSSSGWTAGAAAY	251	265	100%	73	2	2	5	0.03	0.01	0.09
1685231	PGDSSSGWTAGAAAYY	251	266	100%	43	0	0	2	0	0	0.06
1392352	PGDSSSGWTAGAAAYYVGYL	251	270	100%	3	2	2	1	0.67	0.14	0.98
1660408	GDSSSGWTAGAAAYYV	252	267	100%	40	1	1	0	0.03	0	0.11
1861385	GDSSSGWTAGAAAYYVGYLQ	252	271	100%	2	1	1	1	0.5	0.02	0.97
2131588	GDSSSGWTAGAAAYY	252	266	100%	1	0	0	1	0	0	0.94
1312333	DSSSGWTAGAAAYYV	253	267	100%	89	1	1	2	0.01	0	0.06
1652342	DSSSGWTAGAAAYYVG	253	268	100%	40	0	0	1	0	0	0.07
1393736	DSSSGWTAGAAAYYVGY	253	269	100%	1	0	0	1	0	0	0.94
1601381	DSSSGWTAGAAAYYVGYL	253	270	100%	32	0	0	2	0	0	0.09
1424271	DSSSGWTAGAAA	253	264	100%	18	1	1	1	0.06	0	0.23
2116175	DSSSGWTAGAAAYYVGYLQPRT	253	274	100%	36	1	1	0	0.03	0	0.12
1309585	SSSGWTAGAAAYYVGYLQPR	254	273	100%	120	1	1	0	0.01	0	0.05
1695745	SSSGWTAGAAAYYVGY	254	269	100%	40	0	0	1	0	0	0.07
1695557	SSGWTAGAAAYYVGYL	255	270	100%	40	0	0	1	0	0	0.07
1509161	SSGWTAGAAAYY	255	266	100%	1	1	1	0	1	0.04	1
1542581	SSGWTAGAAAYYVGY	255	269	100%	7	0	0	1	0	0	0.33
1310800	SGWTAGAAAYYVGYL	256	270	100%	89	4	3	2	0.04	0.02	0.11
1693450	SGWTAGAAAYYVGYLQ	256	271	100%	43	0	0	2	0	0	0.06
1504613	SGWTAGAAAYYV	256	267	100%	1	0	0	1	0	0	0.94
1087542	GWTAGAAAYYVGYLQPRT	257	274	100%	21	1	1	1	0.05	0	0.2
1312633	GWTAGAAAYYVGYLQ	257	271	100%	61	7	1	2	0.11	0.06	0.22
1663783	GWTAGAAAYYVGYLQP	257	272	100%	40	0	0	1	0	0	0.07
1972969	GWTAGAAA	257	264	100%	1	1	1	0	1	0.04	1
1075117	WTAGAAAYYVGY	258	269	100%	37	5	1	1	0.14	0.05	0.26
1327824	WTAGAAAYY	258	266	100%	25	5	3	2	0.2	0.08	0.37
1708157	WTAGAAAYYVGYLQPR	258	273	100%	40	0	0	1	0	0	0.07
1696996	TAGAAAYYVGYLQPRT	259	274	100%	40	0	0	1	0	0	0.07
1512223	TAGAAAYYVGYL	259	270	100%	18	1	1	1	0.06	0	0.23
1542664	TAGAAAYYVGYLQPR	259	273	100%	43	2	1	1	0.05	0.01	0.13
1596326	TAGAAAYYVGYLQPRTFLLKYNENGTITDA	259	288	100%	52	52	1	0	1	0.93	1
1643972	AGAAAYYVGYLQPRTF	260	275	100%	40	0	0	1	0	0	0.07
1393677	AGAAAYYVGYLQPRTFL	260	276	100%	1	0	0	1	0	0	0.94
2144756	AGAAAYYVGYLQPRTFLL	260	277	100%	16	3	1	0	0.19	0.05	0.41
1310431	GAAAYYVGYLQPRTF	261	275	100%	128	5	5	4	0.04	0.02	0.09
1317282	GAAAYYVGY	261	269	100%	7	1	1	1	0.14	0.01	0.5
1659833	GAAAYYVGYLQPRTFL	261	276	100%	43	0	0	2	0	0	0.06
1380826	GAAAYYVGYLQPRTFLLKYNENGTI	261	285	100%	2	2	2	0	1	0.22	1
1392166	GAAAYYVGYLQPRTFLLKYN	261	280	100%	2	2	2	0	1	0.22	1
1392167	GAAAYYVGYLQPRTFLLKYNENGTITDAVDCALDPLSET	261	299	100%	19	2	1	0	0.11	0.02	0.29
1852983	GAAAYYVGYLQPRTFLLKYNENGTITD	261	287	100%	1	1	1	0	1	0.04	1
1438183	GAAAYYVGYLQP	261	272	100%	1	0	0	1	0	0	0.94
1642929	AAAYYVGYLQPRTFLL	262	277	100%	40	0	0	1	0	0	0.07
1406475	AAAYYVGYLQPR	262	273	100%	1	0	0	1	0	0	0.94
2000970	AAAYYVGYLQPRTFL	262	276	100%	23	1	1	1	0.04	0	0.18
1309656	AAYYVGYL	263	270	100%	6	6	2	0	1	0.61	1
1334450	AAYYVGYLQPRTF	263	275	100%	20	3	1	0	0.15	0.04	0.33
1643229	AAYYVGYLQPRTFLLK	263	278	100%	40	0	0	1	0	0	0.07
1407068	AAYYVGYLQPRT	263	274	100%	1	0	0	1	0	0	0.94
1539375	AAYYVGYLQPRTFLL	263	277	100%	7	0	0	1	0	0	0.33
1309442	AYYVGYLQPRTFLLKYNENG	264	283	100%	120	1	1	0	0.01	0	0.05
1309673	AYYVGYLQP	264	272	100%	5	5	1	0	1	0.55	1
1647259	AYYVGYLQPRTFLLKY	264	279	100%	40	0	0	1	0	0	0.07
1414828	AYYVGYLQPRTF	264	275	100%	1	0	0	1	0	0	0.94
1075131	YYVGYLQPRTFLL	265	277	100%	37	17	2	0	0.46	0.32	0.6
1087815	YYVGYLQPRTFLLKYNEN	265	282	100%	20	0	0	1	0	0	0.13
1329031	YYVGYLQPRTF	265	275	100%	26	3	1	2	0.12	0.03	0.26
1314078	YYVGYLQPRTFLLKY	265	279	100%	83	10	3	1	0.12	0.07	0.21
1711598	YYVGYLQPRTFLLKYN	265	280	100%	40	0	0	1	0	0	0.07
1539271	YYVGYLQPRTFL	265	276	100%	18	11	1	1	0.61	0.39	0.79
1711597	YYVGYLQPR	265	273	100%	3	1	1	0	0.33	0.01	0.85
1310979	YVGYLQPRTFLLKYN	266	280	100%	65	9	4	1	0.14	0.07	0.24
1711171	YVGYLQPRTFLLKYNE	266	281	100%	43	0	0	2	0	0	0.06
1334183	VGYLQPRTFL	267	276	100%	4	1	1	0	0.25	0.01	0.74
1334182	VGYLQPRTF	267	275	100%	9	3	2	1	0.33	0.1	0.64
1703249	VGYLQPRTFLLKYNEN	267	282	100%	40	0	0	1	0	0	0.07
1394118	VGYLQPRTFLLKYNENG	267	283	100%	1	0	0	1	0	0	0.94
1623020	VGYLQPRTFLLKYNENGT	267	284	100%	32	0	0	2	0	0	0.09
1543106	VGYLQPRTFLLKYNE	267	281	100%	7	1	1	0	0.14	0.01	0.5
1597838	VGYLQPRTFLLKYNENGTITDAVDC	267	291	100%	7	0	0	1	0	0	0.33
2116297	VGYLQPRTFLLKYNENGTITDA	267	288	100%	1	1	1	0	1	0.04	1
1317916	GYLQPRTFLL	268	277	100%	21	2	2	0	0.1	0.02	0.26
1663890	GYLQPRTFLLKYNENG	268	283	100%	40	0	0	1	0	0	0.07
1392203	GYLQPRTF	268	275	100%	1	1	1	0	1	0.04	1
1547648	GYLQPRTFL	268	276	100%	8	1	1	0	0.13	0.01	0.46
2001092	GYLQPRTFLLKYNEN	268	282	100%	22	1	1	0	0.05	0	0.19
1309147	YLQPRTFLL	269	277	100%	627	385	36	3	0.61	0.58	0.65
1874038	YLQPRTFLLKYNE	269	281	100%	1	1	1	0	1	0.04	1
1314014	YLQPRTFLLKYNENG	269	283	100%	53	0	0	2	0	0	0.07
1709956	YLQPRTFLLKYNENGT	269	284	100%	40	0	0	1	0	0	0.07
1346790	YFQPRTFLL	269	278	88.89%	35	6	1	0	0.17	0.08	0.3
1392531	YLQPRTF	269	275	100%	1	0	0	1	0	0	0.94
1593848	YLQLRTFLL	269	278	88.89%	2	2	2	0	1	0.22	1
1593850	YLQPRIFLL	269	278	88.89%	1	1	1	0	1	0.04	1
1593851	YLQPSTFLL	269	278	88.89%	3	0	0	1	0	0	0.61
2134360	YLRPRTFLL	269	277	88.89%	1	1	1	0	1	0.04	1
1677242	LQPRTFLLKYNENGTI	270	285	100%	40	0	0	1	0	0	0.07
1072010	QPRTFLLKYNENGTI	271	285	100%	115	5	3	6	0.04	0.02	0.1
1688644	QPRTFLLKYNENGTIT	271	286	100%	43	0	0	2	0	0	0.06
1392385	QPRTFLLKYNENGTITDAVD	271	290	100%	2	0	0	2	0	0	0.76
1972989	QPRTFLLKYNEN	271	282	100%	17	0	0	1	0	0	0.15
1686480	PRTFLLKYNENGTITD	272	287	100%	20	1	1	0	0.05	0	0.21
1397183	PRTFLLKYNENGTITDA	272	288	100%	15	6	1	0	0.4	0.19	0.63
1489699	PRTFLLKYNENG	272	283	100%	1	0	0	1	0	0	0.94
2132820	PRTFLLKYNENGTIT	272	286	100%	1	0	0	1	0	0	0.94
1087714	RTFLLKYNENGTITDAVD	273	290	100%	20	0	0	1	0	0	0.13
1313495	RTFLLKYNENGTITD	273	287	100%	53	1	1	1	0.02	0	0.1
1333392	RTFLLKYNENGTITDAVDCALDPLSETKCT	273	302	100%	64	1	1	0	0.02	0	0.08
1691446	RTFLLKYNENGTITDA	273	288	100%	20	1	1	0	0.05	0	0.21
1309592	TFLLKYNENGTITDAVDCAL	274	293	100%	120	3	1	0	0.03	0.01	0.07
1697844	TFLLKYNENGTITDAV	274	289	100%	20	1	1	0	0.05	0	0.21
1394092	TFLLKYNENGTITDAVD	274	290	100%	1	0	0	1	0	0	0.94
1621279	TFLLKYNENGTITDAVDC	274	291	100%	32	0	0	2	0	0	0.09
2001330	TFLLKYNENGTITDA	274	288	100%	36	4	1	0	0.11	0.04	0.23
2061122	TFLLKYNENGTITDAVDCALDPLSE	274	298	100%	1	0	0	1	0	0	0.94
1657791	FLLKYNENGTITDAVD	275	290	100%	40	0	0	1	0	0	0.07
1434386	FLLKYNENGTITDAV	275	289	100%	8	2	2	0	0.25	0.05	0.59
1310597	LLKYNENGTITDAVD	276	290	100%	49	2	2	1	0.04	0.01	0.12
1675959	LLKYNENGTITDAVDC	276	291	100%	43	0	0	2	0	0	0.06
1071263	LKYNENGTITDAVDC	277	291	100%	90	5	2	2	0.06	0.02	0.12
1675660	LKYNENGTITDAVDCA	277	292	100%	20	1	1	0	0.05	0	0.21
1468535	LKYNENGTITDA	277	288	100%	18	1	1	1	0.06	0	0.23
1672893	KYNENGTITDAVDCAL	278	293	100%	20	1	1	0	0.05	0	0.21
1463497	KYNENGTITDAVDCALDPLS	278	297	100%	1	1	1	0	1	0.04	1
1710108	YNENGTITDAVDCALD	279	294	100%	40	0	0	1	0	0	0.07
1543494	YNENGTITDAVDCAL	279	293	100%	7	0	0	1	0	0	0.33
1681391	NENGTITDAVDCALDP	280	295	100%	40	0	0	1	0	0	0.07
1392568	N280	280	280	100%	1	1	1	0	1	0.04	1
2001216	NENGTITDAVDCALD	280	294	100%	36	2	1	0	0.06	0.01	0.16
1310367	ENGTITDAVDCALDP	281	295	100%	124	3	3	5	0.02	0.01	0.07
1087498	ENGTITDAVDCALDPLSE	281	298	100%	52	0	0	3	0	0	0.07
1654885	ENGTITDAVDCALDPL	281	296	100%	43	0	0	2	0	0	0.06
1871542	ENGTITDAVDCAL	281	293	100%	1	1	1	0	1	0.04	1
1393752	ENGTITDAVDCALDPLS	281	297	100%	1	0	0	1	0	0	0.94
1392138	ENGTITDAVDCALDPLSETK	281	300	100%	1	0	0	1	0	0	0.94
1392139	ENGTITDAVDCALDPLSETKCTLKSFTVEKGIYQTSNFR	281	319	100%	19	3	1	0	0.16	0.04	0.35
2116180	ENGTITDAVDCALDPLSETKCT	281	302	100%	36	2	1	0	0.06	0.01	0.16
1681919	NGTITDAVDCALDPLS	282	297	100%	40	0	0	1	0	0	0.07
2125429	NGTITDAVDCALDPL	282	296	100%	1	0	0	1	0	0	0.94
1663087	GTITDAVDCALDPLSE	283	298	100%	40	0	0	1	0	0	0.07
1444535	GTITDAVDCALD	283	294	100%	18	1	1	1	0.06	0	0.23
1540603	GTITDAVDCALDPLS	283	297	100%	43	9	2	0	0.21	0.11	0.33
1309593	TITDAVDCALDPLSETKCTL	284	303	100%	120	4	1	0	0.03	0.01	0.08
1698586	TITDAVDCALDPLSET	284	299	100%	40	0	0	1	0	0	0.07
1596347	TITDAVDCALDPLSETKCTLKSFTVEKGIY	284	313	100%	52	52	1	0	1	0.93	1
1312780	ITDAVDCALDPLSET	285	299	100%	53	2	1	1	0.04	0.01	0.13
1668274	ITDAVDCALDPLSETK	285	300	100%	40	0	0	1	0	0	0.07
1872422	ITDAVDCALDPLS	285	297	100%	1	1	1	0	1	0.04	1
1966615	ITDAVDCALDPLSETKCTLKS	285	305	100%	1	1	1	0	1	0.04	1
1310834	TDAVDCALDPLSETK	286	300	100%	90	8	2	2	0.09	0.05	0.17
1697335	TDAVDCALDPLSETKC	286	301	100%	43	0	0	2	0	0	0.06
1512925	TDAVDCALDPLS	286	297	100%	2	2	2	0	1	0.22	1
1391827	DAVDCALDPLSETKCTLKSFTVEKGIYQTSN	287	317	100%	35	15	2	1	0.43	0.28	0.57
1649688	DAVDCALDPLSETKCT	287	302	100%	40	0	0	1	0	0	0.07
1397264	DAVDCALDPLSETKCTLKS	287	305	100%	1	0	0	1	0	0	0.94
1539796	DAVDCALDPLSETKC	287	301	100%	7	2	1	0	0.29	0.05	0.64
2060976	DAVDCALDPLSETKCTLKSFTVEKG	287	311	100%	1	0	0	1	0	0	0.94
1646688	AVDCALDPLSETKCTL	288	303	100%	40	0	0	1	0	0	0.07
1393699	AVDCALDPLSETKCTLK	288	304	100%	1	0	0	1	0	0	0.94
1599664	AVDCALDPLSETKCTLKS	288	305	100%	32	0	0	2	0	0	0.09
1646687	AVDCALDPL	288	296	100%	3	0	0	1	0	0	0.61
1087768	VDCALDPLSETKCTLKSF	289	306	100%	20	0	0	1	0	0	0.13
1313838	VDCALDPLSETKCTL	289	303	100%	89	6	2	1	0.07	0.03	0.14
1390228	VDCALDPLSETKCTLK	289	304	100%	40	0	0	1	0	0	0.07
1390229	VDCALDPLSETKCTLKS	289	305	100%	1	1	1	0	1	0.04	1
1522005	VDCALDPLSETK	289	300	100%	18	0	0	2	0	0	0.15
1378352	DCALDPLSETKCTLKS	290	305	100%	40	0	0	1	0	0	0.07
1310302	CALDPLSETKCTLKS	291	305	100%	83	2	2	5	0.02	0.01	0.08
1074866	CALDPLSETK	291	300	100%	36	2	1	0	0.06	0.01	0.16
1647319	CALDPLSETKCTLKSF	291	306	100%	43	0	0	2	0	0	0.06
1392065	CALDPLSETKCTLKSFTVEK	291	310	100%	1	0	0	1	0	0	0.94
1314425	ALDPLSETK	292	300	100%	12	1	1	1	0.08	0	0.33
1644859	ALDPLSETKCTLKSFT	292	307	100%	40	0	0	1	0	0	0.07
1597654	ALDPLSETKCTLKSFTVEKGIYQTS	292	316	100%	7	0	0	1	0	0	0.33
1625351	ALDPLSETKCT	292	302	100%	20	7	1	0	0.35	0.18	0.55
1945476	ALDPLSETKCTLKSFTVEKGIYQTSNFRV	292	320	100%	2	2	1	0	1	0.22	1
2000980	ALDPLSETKCTLKSF	292	306	100%	37	5	1	1	0.14	0.05	0.26
1311393	LDPLSET	293	299	100%	1	1	1	0	1	0.04	1
1312959	LDPLSETKCTLKSFT	293	307	100%	53	1	1	1	0.02	0	0.1
1673792	LDPLSETKCTLKSFTV	293	308	100%	40	0	0	1	0	0	0.07
1309450	DPLSETKCTLKSFTVEKGIY	294	313	100%	120	1	1	0	0.01	0	0.05
1651937	DPLSETKCTLKSFTVE	294	309	100%	40	0	0	1	0	0	0.07
1071785	PLSETKCTLKSFTVE	295	309	100%	44	7	2	1	0.16	0.08	0.27
1685956	PLSETKCTLKSFTVEK	295	310	100%	20	1	1	0	0.05	0	0.21
1393985	PLSETKCTLKSFTVEKG	295	311	100%	1	0	0	1	0	0	0.94
1615800	PLSETKCTLKSFTVEKGI	295	312	100%	32	2	1	1	0.06	0.01	0.18
1488457	PLSETKCTLKSF	295	306	100%	18	2	1	1	0.11	0.02	0.3
2116254	PLSETKCTLKSFTVEKGIYQTS	295	316	100%	36	3	1	0	0.08	0.02	0.2
1310618	LSETKCTLKSFTVEK	296	310	100%	54	3	1	2	0.06	0.02	0.15
1677692	LSETKCTLKSFTVEKG	296	311	100%	23	2	1	1	0.09	0.02	0.24
1075045	SETKCTLKSFTVEK	297	310	100%	36	5	1	0	0.14	0.06	0.26
1087719	SETKCTLKSFTVEKGIYQ	297	314	100%	21	1	1	1	0.05	0	0.2
1324353	SETKCTLKSF	297	306	100%	5	2	1	0	0.4	0.08	0.8
1313542	SETKCTLKSFTVEKG	297	311	100%	53	0	0	2	0	0	0.07
1692833	SETKCTLKSFTVEKGI	297	312	100%	40	0	0	1	0	0	0.07
1869221	SETKCTLKSFTVEKGIYQTS	297	316	100%	1	1	1	0	1	0.04	1
1316068	ETKCTLKSF	298	306	100%	4	1	1	0	0.25	0.01	0.74
1655527	ETKCTLKSFTVEKGIY	298	313	100%	40	1	1	0	0.03	0	0.11
2001044	ETKCTLKSFTVEKGI	298	312	100%	36	1	1	0	0.03	0	0.12
1698674	TKCTLKSFTVEKGIYQ	299	314	100%	40	0	0	1	0	0	0.07
1515550	TKCTLKSFTVEK	299	310	100%	1	0	0	1	0	0	0.94
1542799	TKCTLKSFTVEKGIY	299	313	100%	7	0	0	1	0	0	0.33
1669387	KCTLKSFTVEKGIYQT	300	315	100%	40	0	0	1	0	0	0.07
1457063	KCTLKSFTVEKG	300	311	100%	1	1	1	0	1	0.04	1
1597718	KCTLKSFTVEKGIYQTSNFR	300	319	100%	6	1	1	0	0.17	0.01	0.56
2061042	KCTLKSFTVEKGIYQTSNFRVQPTE	300	324	100%	1	0	0	1	0	0	0.94
1069290	CTLKSFTVEKGIYQT	301	315	100%	180	7	4	6	0.04	0.02	0.08
1649023	CTLKSFTVEKGIYQTS	301	316	100%	43	0	0	2	0	0	0.06
1392094	CTLKSFTVEKGIYQTSNFRV	301	320	100%	77	3	2	1	0.04	0.01	0.11
1392095	CTLKSFTVEKGIYQTSNFRVQPTESIVRFPNITNLCPFG	301	339	100%	19	2	1	0	0.11	0.02	0.29
1418312	CTLKSFTVEKGI	301	312	100%	18	14	1	1	0.78	0.56	0.92
1649022	CTLKSFTVEK	301	310	100%	3	1	1	0	0.33	0.01	0.85
1313756	TLKSFTVEK	302	310	100%	21	1	1	2	0.05	0	0.2
1330210	TLKSFTVEKGIYQTSN	302	317	100%	40	3	1	0	0.08	0.02	0.18
1330211	TLKSFTVEKGIYQTSNF	302	318	100%	1	0	0	1	0	0	0.94
1621623	TLKSFTVEKGIYQTSNFR	302	319	100%	32	2	1	1	0.06	0.01	0.18
1972999	TLKSFTVE	302	309	100%	1	1	1	0	1	0.04	1
1330209	TLKSFTVEKGIYQTS	302	316	100%	1	0	0	1	0	0	0.94
1329686	LKSFTVEKGIYQTSNF	303	318	100%	40	4	1	0	0.1	0.03	0.21
1330518	LKSFTVEKGIYQ	303	314	100%	1	0	0	1	0	0	0.94
1329685	LKSFTVEKGIYQTSN	303	317	100%	7	1	1	0	0.14	0.01	0.5
1309505	KSFTVEKGIYQTSNFRVQPT	304	323	100%	159	8	2	0	0.05	0.03	0.1
1576628	KSFTVEKGIYQTSNFRVQP	304	322	100%	1	1	1	0	1	0.04	1
2134896	K304, S371, N388	304	388	100%	1	1	1	0	1	0.04	1
1672067	KSFTVEKGIYQTSNFR	304	319	100%	40	2	1	0	0.05	0.01	0.14
1908546	KSFTVEKGI	304	312	100%	1	1	1	0	1	0.04	1
2001159	KSFTVEKGIYQTSNF	304	318	100%	36	2	1	0	0.06	0.01	0.16
2145027	KSFTVEKGIYQTSNFRVQ	304	321	100%	2	2	1	0	1	0.22	1
1087720	SFTVEKGIYQTSNFRVQP	305	322	100%	21	1	1	1	0.05	0	0.2
1313550	SFTVEKGIYQTSNFR	305	319	100%	53	0	0	2	0	0	0.07
1693104	SFTVEKGIYQTSNFRV	305	320	100%	40	2	1	0	0.05	0.01	0.14
1869244	SFTVEKGIYQTSNFRVQPTE	305	324	100%	1	1	1	0	1	0.04	1
1310423	FTVEKGIYQTSNFRV	306	320	100%	49	7	4	0	0.14	0.07	0.25
1380761	FTVEKGIYQTSNFRVQ	306	321	100%	43	2	1	1	0.05	0.01	0.13
1073495	TVEKGIYQTSNFRVQ	307	321	100%	44	3	2	1	0.07	0.02	0.16
1700875	TVEKGIYQTSNFRVQP	307	322	100%	40	4	1	0	0.1	0.03	0.21
1330276	VEKGIYQTSNFRVQPT	308	323	100%	40	6	1	0	0.15	0.07	0.27
1312359	EKGIYQTSNFRVQPT	309	323	100%	53	1	1	1	0.02	0	0.1
1654428	EKGIYQTSNFRVQPTE	309	324	100%	40	10	1	0	0.25	0.14	0.38
1393747	EKGIYQTSNFRVQPTES	309	325	100%	1	0	0	1	0	0	0.94
1602600	EKGIYQTSNFRVQPTESI	309	326	100%	32	1	1	1	0.03	0	0.13
1595630	EKGIYQTSNFRVQPTESIVRFPNITNLC	309	336	100%	52	52	1	0	1	0.93	1
2116179	EKGIYQTSNFRVQPTESIVRFP	309	330	100%	36	1	1	0	0.03	0	0.12
30987	KGIYQTSN	310	317	100%	7	4	3	1	0.57	0.22	0.86
1670141	KGIYQTSNFRVQPTES	310	325	100%	40	11	1	0	0.28	0.16	0.41
1329625	KGIYQTSNFRVQPTE	310	324	100%	36	3	1	0	0.08	0.02	0.2
2134134	KGIYQTSNFRV	310	320	100%	40	29	1	0	0.73	0.59	0.83
1310445	GIYQTSNFRVQPTES	311	325	100%	82	13	5	3	0.16	0.1	0.25
1661449	GIYQTSNFRVQPTESI	311	326	100%	43	1	1	1	0.02	0	0.1
1392177	GIYQTSNF	311	318	100%	1	0	0	1	0	0	0.94
1392178	GIYQTSNFRVQPTESIVRFP	311	330	100%	2	1	1	1	0.5	0.02	0.97
1547148	GIYQTSNFR	311	319	100%	11	1	1	1	0.09	0	0.35
1319328	IYQTSNFRV	312	320	100%	33	3	2	2	0.09	0.02	0.21
1669025	IYQTSNFRVQPTESIV	312	327	100%	40	1	1	0	0.03	0	0.11
2135491	IYQTSNFRVQPTESIVRFPN	312	331	100%	1	1	1	0	1	0.04	1
2122526	IYQTSNFRVQPTESI	312	326	100%	1	0	0	1	0	0	0.94
1087812	YQTSNFRVQPTESIVRFP	313	330	100%	21	1	1	1	0.05	0	0.2
1314036	YQTSNFRVQPTESIV	313	327	100%	89	8	2	1	0.09	0.05	0.17
1710501	YQTSNFRVQPTESIVR	313	328	100%	40	1	1	0	0.03	0	0.11
1537200	YQTSNFRVQPTESIVRFPN	313	331	100%	1	1	1	0	1	0.04	1
1537199	YQTSNFRVQPTE	313	324	100%	18	4	1	1	0.22	0.08	0.43
1870690	YQTSNFRVQPTESIVRFPNI	313	332	100%	1	1	1	0	1	0.04	1
2061150	YQTSNFRVQPTESIVRFPNITNLCP	313	337	100%	1	0	0	1	0	0	0.94
1309565	QTSNFRVQPTESIVRFPNIT	314	333	100%	120	0	0	1	0	0	0.03
1689171	QTSNFRVQPTESIVRF	314	329	100%	40	1	1	0	0.03	0	0.11
1495586	QTSNFRVQPTES	314	325	100%	1	0	0	1	0	0	0.94
1700323	TSNFRVQPTESIVRFP	315	330	100%	40	1	1	0	0.03	0	0.11
1397216	TSNFRVQPTESIVRF	315	329	100%	22	4	1	1	0.18	0.06	0.36
1518929	TSNFRVQPTESI	315	326	100%	1	0	0	1	0	0	0.94
1597829	TSNFRVQPTESIVRFPNITN	315	334	100%	6	0	0	1	0	0	0.38
1310814	SNFRVQPTESIVRFP	316	330	100%	100	18	6	0	0.18	0.12	0.27
1694749	SNFRVQPTESIVRFPN	316	331	100%	43	1	1	1	0.02	0	0.1
1394062	SNFRVQPTESIVRFPNI	316	332	100%	1	0	0	1	0	0	0.94
1542532	SNFRVQPTESIVRFPNITNL	316	335	100%	1	1	1	0	1	0.04	1
1507236	SNFRVQPTESIV	316	327	100%	3	2	1	1	0.67	0.14	0.98
2145187	SNFRVQPTESIVRFPNIT	316	333	100%	16	2	1	0	0.13	0.02	0.33
1313203	NFRVQPTESIVRFPN	317	331	100%	64	4	4	1	0.06	0.02	0.15
1681601	NFRVQPTESIVRFPNI	317	332	100%	40	0	0	1	0	0	0.07
1597765	NFRVQPTESIVRFPNITNLCPFGEV	317	341	100%	1	1	1	0	1	0.04	1
1658570	FRVQPTESIVRFPNIT	318	333	100%	40	0	0	1	0	0	0.07
1333410	RVQPTESIVRF	319	329	100%	7	1	1	0	0.14	0.01	0.5
1691697	RVQPTESIVRFPNITN	319	334	100%	40	1	1	0	0.03	0	0.11
1501003	RVQPTESIVRFP	319	330	100%	18	1	1	1	0.06	0	0.23
1542357	RVQPTESIVRFPNIT	319	333	100%	52	10	2	2	0.19	0.11	0.32
2142897	RVQPTESIVRFPNITNLCPF	319	338	100%	1	0	0	1	0	0	0.94
1075108	VQPTESIVRFPNITNLCPF	320	338	100%	36	9	1	0	0.25	0.14	0.39
1705434	VQPTESIVRFPNITNL	320	335	100%	20	1	1	0	0.05	0	0.21
1310745	QPTESIVRFPNITNL	321	335	100%	143	11	6	5	0.08	0.04	0.13
1323461	QPTESIVRF	321	329	100%	14	7	5	0	0.5	0.26	0.73
1087696	QPTESIVRFPNITNLCPF	321	338	100%	20	0	0	1	0	0	0.13
1688660	QPTESIVRFPNITNLC	321	336	100%	43	0	0	2	0	0	0.06
1392386	QPTESIVRFPNITNLCPFGE	321	340	100%	3	1	1	2	0.33	0.01	0.85
1686710	PTESIVRFPNITNLCP	322	337	100%	40	0	0	1	0	0	0.07
1583640	PTESIVRFPNIFNATRFASV	322	342	70%	1	1	1	0	1	0.04	1
1860862	PTESIVRFPNITNLC	322	336	100%	42	7	2	1	0.17	0.08	0.28
1325420	TESIVRFPNITNL	323	335	100%	5	2	1	0	0.4	0.08	0.8
1697661	TESIVRFPNITNLCPF	323	338	100%	40	0	0	1	0	0	0.07
1394091	TESIVRFPNITNLCPFG	323	339	100%	1	0	0	1	0	0	0.94
1621247	TESIVRFPNITNLCPFGE	323	340	100%	32	0	0	2	0	0	0.09
1513577	TESIVRFPNITN	323	334	100%	1	0	0	1	0	0	0.94
1542722	TESIVRFPNITNLCP	323	337	100%	7	1	1	0	0.14	0.01	0.5
1862812	T320, E321, R325, T528, N529, L530, V531, K532, N533, K534, E551, S552, N553, K554, T578, L579, E580, I581	323	584	100%	1	1	1	0	1	0.04	1
2116282	TESIVRFPNITNLCPFGEVFNA	323	344	100%	36	3	1	0	0.08	0.02	0.2
1309463	ESIVRFPNITNLCPFGEVFN	324	343	100%	120	0	0	1	0	0	0.03
1655367	ESIVRFPNITNLCPFG	324	339	100%	20	1	1	0	0.05	0	0.21
1313572	SIVRFPNITNLCPFG	325	339	100%	112	7	3	4	0.06	0.03	0.12
1693813	SIVRFPNITNLCPFGE	325	340	100%	40	0	0	1	0	0	0.07
1505424	SIVRFPNITNLC	325	336	100%	18	10	1	1	0.56	0.34	0.75
1310515	IVRFPNITNLCPFGE	326	340	100%	73	19	6	1	0.26	0.17	0.37
1668780	IVRFPNITNLCPFGEV	326	341	100%	43	0	0	2	0	0	0.06
2001133	IVRFPNITNLCPFDE	326	340	93.33%	1	1	1	0	1	0.04	1
2061038	IVRFPNITNLCPFGEVFNATRFASV	326	350	100%	1	0	0	1	0	0	0.94
70718	VRFPNITNL	327	335	100%	57	2	1	2	0.04	0.01	0.12
1705585	VRFPNITNLCPFGEVF	327	342	100%	40	0	0	1	0	0	0.07
1543232	VRFPNITNLCPFGEV	327	341	100%	7	3	1	0	0.43	0.13	0.76
1323786	RFPNITNLCPF	328	338	100%	19	2	2	1	0.11	0.02	0.29
1690068	RFPNITNLCPFGEVFN	328	343	100%	40	0	0	1	0	0	0.07
1860869	RFPNITNLCPFGEVF	328	342	100%	41	4	2	0	0.1	0.03	0.2
1862229	RFPNITNLCPFGEVFNATRFA	328	348	100%	1	0	0	1	0	0	0.94
531734	FPNITNLCPFGEVFN	329	343	100%	61	4	2	2	0.07	0.03	0.16
1087518	FPNITNLCPFGEVFNATR	329	346	100%	20	0	0	1	0	0	0.13
1570737	FPNITNLCPFGEVFNATRFASVYAWNRK	329	356	100%	1	1	1	0	1	0.04	1
1658340	FPNITNLCPFGEVFNA	329	344	100%	20	1	1	0	0.05	0	0.21
2134072	FPNITNLCP	329	337	100%	1	1	1	0	1	0.04	1
2061002	FPNITNLCPFDEVFNATRFA	329	348	95%	7	0	0	1	0	0	0.33
2061003	FPNITNLCPFGEVFNATRFA	329	348	100%	7	2	1	0	0.29	0.05	0.64
1333092	PNITNLCPFGEVFNATRFASVYAWNRKRIS	330	359	100%	55	1	1	0	0.02	0	0.1
1686116	PNITNLCPFGEVFNAT	330	345	100%	40	1	1	0	0.03	0	0.11
1393988	PNITNLCPFGEVFNATR	330	346	100%	1	0	0	1	0	0	0.94
1386781	PNITNLCPFGEVFNATRFAS	330	349	100%	7	1	1	1	0.14	0.01	0.5
1615820	PNITNLCPFGEVFNATRF	330	347	100%	32	0	0	2	0	0	0.09
1310666	NITNLCPFGEVFNAT	331	345	100%	129	5	3	7	0.04	0.02	0.09
1682229	NITNLCPFGEVFNATR	331	346	100%	43	0	0	2	0	0	0.06
1594756	N331, I332, T333, N334, L335, P337, G339, E340, N343, A344, T345, R346, K356, R357, S359, C361, L441	331	441	100%	1	1	1	0	1	0.04	1
1392325	NITNLCPFGEVFNATRFASV	331	350	100%	2	1	1	1	0.5	0.02	0.97
2134937	N331, I332, T333, N334, L335, P337, G339, E340, N343, A344, T345, R346, K356, R357, S359, C361, L441	331	441	100%	3	3	3	0	1	0.37	1
1481143	NITNLCPFGEVF	331	342	100%	18	3	1	1	0.17	0.05	0.37
1625413	NITNLCPFGEVFNATRFASVYAWNRK	331	356	100%	20	7	1	0	0.35	0.18	0.55
1862954	N331, I332, T333, N334, L335, P337, G339, E340, N343, A344, T345, R346, K356, R357, S359, C361, L441	331	441	100%	2	2	2	0	1	0.22	1
1874155	N328	331	331	100%	9	0	0	1	0	0	0.27
1668418	ITNLCPFGEVFNATRF	332	347	100%	40	0	0	1	0	0	0.07
1393662	I332, L335, C336, P337, F338, G339, E340, F342, N343, D364, L368, K529	332	529	100%	1	1	1	0	1	0.04	1
2134894	I332, T333, N334, L335, C336, P337, G339, E340, V341, N343, A344, T345, R346, N354, K356, R357, I358, S359, N360, C361, N440, L441, R509	332	509	100%	1	1	1	0	1	0.04	1
1874124	I329	332	332	100%	9	0	0	1	0	0	0.27
2135610	I332, T333, N334, L335, C336, P337, F338, G339, E340, F342, N343, T345, V362, A363, D364, Y365, V367, L368, P527, K529	332	529	100%	6	6	1	0	1	0.61	1
2131990	ITNLCPFGEVFNATR	332	346	100%	1	0	0	1	0	0	0.94
1313768	TNLCPFGEVFNATRF	333	347	100%	58	1	1	2	0.02	0	0.09
1699509	TNLCPFGEVFNATRFA	333	348	100%	40	0	0	1	0	0	0.07
1860913	T10, N11, L12, C13, P14, F15, G16, E17, F19, N20, T22, R23, V39, A40, D41, Y42, V44, L45, K205	333	528	100%	1	1	1	0	1	0.04	1
1860914	T10, N11, L12, C13, P14, F15, G16, E17, F19, N20, T22, V39, A40, D41, Y42, V44, L45	333	368	100%	1	1	1	0	1	0.04	1
1874206	T330	333	333	100%	9	0	0	1	0	0	0.27
2116030	T333, V382, L387, D389, L390, C391, T393, L517, L518, H519, A520, P521, A522, T523, V524, C525	333	525	100%	1	1	1	0	1	0.04	1
1310987	N334, L335, P337, G339, E340, N343, A344, T345, R346, K356, R357, S359, N360, C361, L441	334	441	100%	1	1	1	0	1	0.04	1
1309535	NLCPFGEVFNATRFASVYAW	334	353	100%	121	2	1	1	0.02	0	0.06
1311772	NLCPF	334	338	100%	1	1	1	0	1	0.04	1
1311245	N334, L335, P337, G339, E340, N343, A344, T345, R346, K356, R357, S359, C361, L441	334	441	100%	43	30	2	0	0.7	0.56	0.81
1682508	NLCPFGEVFNATRFAS	334	349	100%	20	1	1	0	0.05	0	0.21
1346818	N334, L335, P337, G339, E340, N343, A344, T345, K356, R357, S359, C361, N440, L441	334	441	100%	1	1	1	0	1	0.04	1
1860856	NLCPFGEVFNATRFA	334	348	100%	55	4	2	1	0.07	0.03	0.17
1862814	N334, L335, P337, G339, E340, N343, A344, T345, R346, N354, K356, R357, S359, C361, L441	334	441	100%	1	1	1	0	1	0.04	1
1864102	N331, L332, P334, D336, E337, N340, A341, T342, R343, K353, S356, C358, L438, R506	334	509	92.86%	1	1	1	0	1	0.04	1
2134938	N334, L335, P337, G339, E340, N343, A344, T345, R346, K356, R357, S359, C361, L441	334	441	100%	2	2	2	0	1	0.22	1
1874156	N331	334	334	100%	9	0	0	1	0	0	0.27
2130773	N331, L332, P334, G336, E337, N340, A341, T342, R343, K353, R354, S356, C358, L438	334	441	100%	1	1	1	0	1	0.04	1
2138087	N331, L332, P334, E337, T342, R343, A345, Y348, A349, W350, N351, R352, K353, R354, I355, S356, N357, Y393, E462, R463, I465, A517	334	520	100%	1	1	1	0	1	0.04	1
1673519	LCPFGEVFNATRFASV	335	350	100%	20	1	1	0	0.05	0	0.21
1464616	LCPFGEVFNATR	335	346	100%	1	0	0	1	0	0	0.94
1541217	LCPFGEVFNATRFAS	335	349	100%	7	0	0	1	0	0	0.33
1874142	L332	335	335	100%	9	0	0	1	0	0	0.27
2135507	LCPFGEVFNATRFASVYAWN	335	354	100%	1	1	1	0	1	0.04	1
1310312	CPFGEVFNATRFASV	336	350	100%	77	18	5	1	0.23	0.15	0.34
1648618	CPFGEVFNATRFASVY	336	351	100%	43	0	0	2	0	0	0.06
1539742	CPFGEVFNATRFASVYAWNR	336	355	100%	1	1	1	0	1	0.04	1
1417489	CPFGEVFNATRF	336	347	100%	1	0	0	1	0	0	0.94
1087675	PFGEVFNATRFASVYAWN	337	354	100%	52	3	2	1	0.06	0.02	0.16
1313277	PFGEVFNATRFASVY	337	351	100%	110	11	4	3	0.1	0.06	0.17
1685113	PFGEVFNATRFASVYA	337	352	100%	40	0	0	1	0	0	0.07
1393980	PFGEVFNATRFASVYAW	337	353	100%	1	0	0	1	0	0	0.94
1486732	PFGEVFNATRFA	337	348	100%	18	5	2	0	0.28	0.12	0.49
1868280	PFGEVFNATRFASVYAWNRK	337	356	100%	2	2	2	0	1	0.22	1
1874170	P334	337	337	100%	9	0	0	1	0	0	0.27
2134519	P334, D336, E337, N340, A341, T342, R343, K353, R354, K437, L438, D439, S440, K441, V442, N445	337	448	87.5%	1	1	1	0	1	0.04	1
2116249	PFGEVFNATRFASVYAWNRKRI	337	358	100%	36	4	1	0	0.11	0.04	0.23
2134471	PFDEVFNATRFASVY	337	351	93.33%	2	2	1	0	1	0.22	1
1074885	FGEVFNATRFASVY	338	351	100%	36	3	1	0	0.08	0.02	0.2
1569860	FGEVFNATRFASVYAWNRKRISNCVA	338	363	100%	1	1	1	0	1	0.04	1
1656928	FGEVFNATRFASVYAW	338	353	100%	40	0	0	1	0	0	0.07
1338772	F338, F342, A363, D364, Y365, S366, V367, L368, Y369, N370, S371, F374, T376, F377, K378, C379, Y380, S383, P384, T385, L387, N388, R403, K417, Y449, Y453, L455, I472, V483, E484, G485, F486, C488, Y489, F490, Q493, S494, Y495, G496, N501, G502, Y505	338	505	100%	1	1	1	0	1	0.04	1
1338773	F338, F342, A363, Y365, S366, V367, L368, Y369, N370, S371, F374, F377, K378, C379, Y380, S383, P384, T385, K386, L387, N388, K528, K529, S530	338	530	100%	1	1	1	0	1	0.04	1
1392147	FGEVFNATRFASVYA	338	352	100%	22	6	2	1	0.27	0.13	0.46
1432822	FGEVFNATRFAS	338	349	100%	1	0	0	1	0	0	0.94
1874100	F335	338	338	100%	9	0	0	1	0	0	0.27
2135463	FGEVFNATRFASVYAWNRKR	338	357	100%	1	1	1	0	1	0.04	1
1317333	GEVFNATRF	339	347	100%	8	2	2	0	0.25	0.05	0.59
1660592	GEVFNATRFASVYAWN	339	354	100%	40	0	0	1	0	0	0.07
1540437	GEVFNATRFASVYAW	339	353	100%	7	1	1	0	0.14	0.01	0.5
1597629	G339, E340, N343, A344, T345, R346, N437, N440, L441, D442, S443, K444, V445, N448, Y451, P499, T500	339	500	100%	1	1	1	0	1	0.04	1
1860905	G16, E17, N20, A21, T22, R23, S50, F51, W113, N117, L118, D119, S120, K121, V122, N125, N127, Y128	339	451	100%	1	1	1	0	1	0.04	1
1874112	G336	339	339	100%	9	0	0	1	0	0	0.27
2061009	GEVFNATRFASVYAWNRKRISNCVA	339	363	100%	1	1	1	0	1	0.04	1
2116339	D336, E337, R343, F344, A345, Y348, A349, W350, N351, K353, S443, G444, N445, Y446, N447, R463, I465, S466, T467, G479, F487	339	490	90.48%	1	1	1	0	1	0.04	1
2134518	D336, E337, F339, N340, A341, T342, R343, V364, L368, F372, W433, N434, K437, L438, K441, R506	339	509	75%	1	1	1	0	1	0.04	1
2134090	GEVFNATRFASV	339	350	100%	4	2	1	0	0.5	0.1	0.89
1316109	EVFNATRFASVY	340	351	100%	7	2	2	1	0.29	0.05	0.64
1655679	EVFNATRFASVYAWNR	340	355	100%	40	0	0	1	0	0	0.07
2134870	E340, V341, N343, T345, R346, F347, A348, Y351, N354, K356, L441, Y449, N450, R466, I468, T470, N481, G482, V483, E484, F490	340	490	100%	1	1	1	0	1	0.04	1
1597461	E337, T342, R343, F344, A345, Y348, N351, K353, Y446, N447, L449, R463, I465, T467, V480, F487	340	490	100%	1	1	1	0	1	0.04	1
1597462	E337, T342, R343, Y348, N351, R352, K353, R354, Y446, N447, L449, R463, I465, S466, T467, E468, G479, F487, L489	340	492	100%	1	1	1	0	1	0.04	1
2134869	E340, N343, A344, T345, R346, N440, L441, D442, S443, K444, V445, N448, N450	340	450	100%	2	2	2	0	1	0.22	1
1860821	EVFNATRFASVYAWN	340	354	100%	46	5	1	1	0.11	0.04	0.21
2134868	E340, A344, T345, R346, F347, A348, S349, Y351, A352, N354, K356, K444, Y449, N450, L452, I468, T470, E471, I472, G482, F490, L492, Q493, S494	340	494	100%	1	1	1	0	1	0.04	1
1874095	E337	340	340	100%	9	0	0	1	0	0	0.27
1972934	E340, A344, T345, R346, F347, A348, Y351, A352, N354, K356, Y449, N450, R466, I468, T470, N481, F490	340	490	100%	4	4	1	0	1	0.47	1
2130775	E337, A341, T342, R343, F344, A345, Y348, A349, N351, Y446, N447, R463, T467, V480, F487	340	490	100%	1	1	1	0	1	0.04	1
2060702	E337, A341, T342, R343, F344, A345, S346, Y348, A349, N351, K441, Y446, N447, L449, R463, T467, E468, I469, F487, L489, R490, S491	340	494	95.45%	3	3	1	0	1	0.37	1
1310886	VFNATRFASVYAWNR	341	355	100%	141	16	5	6	0.11	0.07	0.18
1335953	V341, F377, K386, L390, R408, A435, E516	341	516	100%	1	1	1	0	1	0.04	1
1335954	V341, F377, N501, V503, Y508, E516	341	516	100%	1	1	1	0	1	0.04	1
1702846	VFNATRFASVYAWNRK	341	356	100%	43	0	0	2	0	0	0.06
1392490	VFNATRFASVYAWNRKRISN	341	360	100%	2	0	0	2	0	0	0.76
1874218	V338	341	341	100%	9	0	0	1	0	0	0.27
1658032	FNATRFASVYAWNRKR	342	357	100%	40	0	0	1	0	0	0.07
1595678	FNATRFASVYAWNRKRISNCVADYS	342	366	100%	59	51	1	1	0.86	0.75	0.93
1625483	F342, T345, R346, L368, S373, F374, W436, N437, N440, L441, K444, V445	342	445	100%	6	6	1	0	1	0.61	1
1874101	F339	342	342	100%	9	0	0	1	0	0	0.27
2133982	F342, N343, T345, R346, N370, S371, A372, S373, W436, N440, L441, K444, N450	342	450	100%	10	10	1	0	1	0.74	1
2131491	FNATRFASVYAWNRK	342	356	100%	10	1	1	1	0.1	0	0.38
1322299	NATRFASVY	343	351	100%	4	1	1	0	0.25	0.01	0.74
1680945	NATRFASVYAWNRKRI	343	358	100%	40	0	0	1	0	0	0.07
1346701	N343, A344, T345, R346, S373, W436, N437, N440, L441, S443, K444, V445, N448, N450, R509	343	509	100%	1	1	1	0	1	0.04	1
1478668	NATRFASVYAWN	343	354	100%	18	2	1	1	0.11	0.02	0.3
1541684	NATRFASVYAWNRKR	343	357	100%	53	3	1	2	0.06	0.02	0.15
1597761	NATRFASVYAWNRKRISNCV	343	362	100%	30	7	1	0	0.23	0.11	0.39
1642863	N343, T345, R346, W436	343	436	100%	1	1	1	0	1	0.04	1
2134939	N343, T345, R346, N439, N440, L441, D442, S443, K444, V445, N448, Y451, P499, T500, R509	343	509	100%	5	5	1	0	1	0.55	1
2134219	NSTRFASVY	343	351	88.89%	1	1	1	0	1	0.04	1
2135611	N341, A342, T343, R344, Y349, N438, L439, D440, S441, K442, G445, N446, Y447, N448, Y449, R450, T468, F488, L490, Q491, S492, R507	343	509	95.45%	1	1	1	0	1	0.04	1
2135622	N343, A344, T345, R346, Y351, N440, L441, D442, S443, K444, N448, Y449, N450, Y451, L452, T470, E484, F490, L492, Q493, S494	343	494	100%	1	1	1	0	1	0.04	1
2145634	N343, T345, G447, Y449, Y453, F456, E465, R466, V483, P499, T500	343	500	100%	1	1	1	0	1	0.04	1
2145635	N343, T345, K378, G413, K417, G447, Y449, Y453, F456, E465, R466, V483, Q493, P499, T500	343	500	100%	1	1	1	0	1	0.04	1
2145636	N343, T345, K378, G447, Y453, F456, E465, R466, V483, P499, T500	343	500	100%	1	1	1	0	1	0.04	1
2145637	N343, T345, K417, G447, Y453, F456, E465, R466, V483, N487, Q493, T500	343	500	100%	1	1	1	0	1	0.04	1
2145638	N343, T345, K444, G447, Y453, E465, R466, V483, P499, T500	343	500	100%	1	1	1	0	1	0.04	1
2145639	N343, T345, S371, G447, Y453, K462, E465, R466, V483, P499, T500	343	500	100%	1	1	1	0	1	0.04	1
2150106	N343, T345, R346, N440, K444, V445, N448	343	448	100%	1	1	1	0	1	0.04	1
1309440	ATRFASVYAWNRKRISNCVA	344	363	100%	120	2	1	0	0.02	0	0.06
1646542	ATRFASVYAWNRKRIS	344	359	100%	40	0	0	1	0	0	0.07
1329170	ATRFASVYAWNRKRISN	344	360	100%	3	1	1	2	0.33	0.01	0.85
1599614	ATRFASVYAWNRKRISNC	344	361	100%	32	3	1	1	0.09	0.02	0.22
1646541	ATRFASVYA	344	352	100%	3	1	1	0	0.33	0.01	0.85
2134857	A344, T345, R346, F347, A348, S349, Y351, A352, N440, K444, V445, G446, G447, N448, Y449, N450	344	450	100%	1	1	1	0	1	0.04	1
1861073	ATRFASVYAWNRKRISNCVAD	344	364	100%	1	1	1	0	1	0.04	1
1874077	A341	344	344	100%	9	0	0	1	0	0	0.27
1087757	TRFASVYAWNRKRISNCV	345	362	100%	20	0	0	1	0	0	0.13
1314090	T345, R346, L441, D442, N448, Y449, N450, L452, F490, S494, Q498, P499, T500, R509	345	509	100%	1	1	1	0	1	0.04	1
1314091	T345, R346, S438, N439, N440, L441, P499	345	499	100%	1	1	1	0	1	0.04	1
1313796	TRFASVYAWNRKRIS	345	359	100%	59	1	1	3	0.02	0	0.09
1334060	TRFASVYAW	345	353	100%	8	1	1	0	0.13	0.01	0.46
1334666	T345, R346, K444, G446, G447, Y449, N450	345	450	100%	5	5	1	0	1	0.55	1
1330240	TRFASVYAWNRKRISN	345	360	100%	40	0	0	1	0	0	0.07
1335950	T345	345	345	100%	4	2	1	0	0.5	0.1	0.89
1335951	T345, R346, L441, K444	345	444	100%	1	1	1	0	1	0.04	1
1338776	T345, N439, N440, S443, K444, V445, G446, G447, N450, Q498, P499, T500, Q506	345	506	100%	1	1	1	0	1	0.04	1
1397555	T345, R346, F347, A348, N354, N440, L441, D442, S443, K444, V445, N448, N450, Y451, P499	345	499	100%	1	1	1	0	1	0.04	1
2135004	T345, N439, N440, L441, D442, S443, K444, V445, G446, N448, Y449, N450, Y451, P499, T500	345	500	100%	8	8	1	0	1	0.69	1
1518321	TRFASVYAWNRKRISNCVA	345	363	100%	1	1	1	0	1	0.04	1
1518322	TRFASVYAWNRKRISNCVADYSVLYNS	345	371	100%	1	1	1	0	1	0.04	1
2135006	T345, R346, A348, S349, Y351, A352, N354, L441, D442, K444, N448, Y449, N450, Y451, L452, R466, F490, R509	345	509	100%	1	1	1	0	1	0.04	1
1518320	TRFASVYAWNRK	345	356	100%	1	0	0	1	0	0	0.94
1597466	T342, R343, N436, N437, L438, K441, V442, G443, G444, N447, Q495, P496, T497	345	500	100%	1	1	1	0	1	0.04	1
1597467	T342, R343, Y348, L438, K441, V442, G444, Y446, N447, L449, I465, T467, G479, K481, F487, L489, S491	345	494	94.12%	1	1	1	0	1	0.04	1
1625484	T345, R346, N439, N440, L441, S443, K444, V445, G446, G447, N450, Q498, P499, T500, Q506	345	506	100%	1	1	1	0	1	0.04	1
2135007	T345, R346, F347, S349, Y351, K444, V445, G446, Y449, N450, Y451, L452, I468, T470, N481, G482, V483, E484, F490, L492	345	492	100%	1	1	1	0	1	0.04	1
1597824	TRFASVYAWNRKRISNCVAD	345	364	100%	7	7	2	0	1	0.65	1
2135005	T345, R346, A348, S349, N354, K356, Y449, N450, L452, T470, Q493, S494	345	494	100%	5	5	1	0	1	0.55	1
2135010	T345, R346, N439, N440, L441, S443, K444, V445, G446, G447, Y449, N450, L452, E484, F490, L492, Q493, S494, P499	345	499	100%	1	1	1	0	1	0.04	1
2135012	T345, R346, N440, L441, S443, K444, V445, N448, N450, Y451, P499, T500	345	500	100%	1	1	1	0	1	0.04	1
1874246	T342, R343, F344, S346, Y348, L438, K441, V442, S443, G444, Y446, N447, L449, T467, F487, L489, R490, S491	345	494	88.89%	1	1	1	0	1	0.04	1
2135011	T345, R346, N440, L441, S443, K444, V445, G446, G447, N448, Y449, N450	345	450	100%	10	8	1	0	0.8	0.49	0.96
1874207	T342	345	345	100%	9	0	0	1	0	0	0.27
1972935	T345, R346, F347, A348, S349, Y351, N440, L441, D442, S443, K444, V445, N448, N450, Y451, R509	345	509	100%	4	4	1	0	1	0.47	1
2000949	T345, R346, Y351, N440, L441, D442, S443, K444, V445, G446, G447, N448, Y449, N450, L452, T470, F490, P499	345	499	100%	1	1	1	0	1	0.04	1
2060933	T342, R343, N436, K437, L438, D439, S440, K441, V442, N445, N447, Y448, P496, T497	345	500	92.86%	1	1	1	0	1	0.04	1
2135009	T345, R346, N439, N440, L441, D442, S443, K444, V445, N448, Y451, P499, T500	345	500	100%	1	1	1	0	1	0.04	1
2116337	T342, R343, Y348, N437, L438, K441, V442, G443, G444, Y446, N447, L449, T467, K481, F487, L489, Q490, S491	345	494	94.44%	1	1	1	0	1	0.04	1
2135008	T345, R346, L441, D442, N448, Y449, N450, L452, F490, S494, Q498, P499, T500, R509	345	509	100%	1	1	1	0	1	0.04	1
2116329	T345, R346, A348, S349, Y351, A352, N354, N440, L441, D442, K444, V445, G446, G447, N448, Y449, N450, L452, T470, E484, F490, L492, S494	345	494	100%	5	5	1	0	1	0.55	1
2116341	T342, R343, F344, Y348, A349, N351, K437, L438, S440, K441, V442, S443, N445, Y446, N447, Y448, L449, I465, T467, F487, L489, S491	345	494	90.91%	5	5	1	0	1	0.55	1
2145640	T345, R346, N439, N440, L441, S443, K444, V445, G446, G447, Y449, N450, L452, E484, F490, S494, P499	345	499	100%	8	8	1	0	1	0.69	1
1310765	RFASVYAWNRKRISN	346	360	100%	132	18	6	4	0.14	0.09	0.21
1075135	R346, K444, G446, G447, N448, Y449, N450, L452, V483, E484, G485, F490, S494	346	494	100%	1	1	1	0	1	0.04	1
1310239	R346, N440, L441, K444, V445, G446, N448, Y449, Q498	346	498	100%	7	7	7	0	1	0.65	1
1309148	R346, K444, G447, Y449, N450, L452, L455, F456, V483, E484, F490, L492, Q493, S494	346	494	100%	1	1	1	0	1	0.04	1
1309149	R346, K444, Y449, N450, L452, L455, F456, G482, V483, E484, Y489, F490, L492, Q493, S494	346	494	100%	1	1	1	0	1	0.04	1
1310989	R346, F347, S349, Y351, K444, G446, G447, N448, Y449, N450, Y451, L452, T470, E484, F490, L492, Q493, S494	346	494	100%	2	2	2	0	1	0.22	1
1329039	R346, K444, V445, G446, Y449, N450, L452, T470, F490, L492, Q498, P499, T500	346	500	100%	1	1	1	0	1	0.04	1
1323761	RFASVYAWNR	346	355	100%	2	1	1	0	0.5	0.02	0.97
1334439	R346, K444, G446, G447, N448, Y449, N450, L452, V483, E484, G485, F490, S494	346	494	100%	1	1	1	0	1	0.04	1
1338979	R346	346	346	100%	1	1	1	0	1	0.04	1
1334686	R346, N440	346	440	100%	1	1	1	0	1	0.04	1
1689995	RFASVYAWNRKRISNC	346	361	100%	43	0	0	2	0	0	0.06
1335942	R346, A352, L452, S494	346	494	100%	1	1	1	0	1	0.04	1
1346702	R346, K444	346	444	100%	1	1	1	0	1	0.04	1
2134963	R346, A352, G446, N450, L452, S494	346	494	100%	6	5	1	0	0.83	0.42	0.99
1392552	R346, Y351, K444, Y449, N450, L452, T470, I472, N481, G482, V483, E484, F490, L492, S494	346	494	100%	5	5	1	0	1	0.55	1
1397231	R346, N439, N440, S443, K444, V445, G446, G447, N450, Q498, P499, T500, N501, G502, Q506	346	506	100%	1	1	1	0	1	0.04	1
1542248	RFASVYAWNRKR	346	357	100%	2	2	1	0	1	0.22	1
1542249	RFASVYAWNRKRISNCVADY	346	365	100%	3	3	1	0	1	0.37	1
1397523	R346, K444, Y449, N450, L452, I472, N481, G482, V483, E484, F490, L492	346	492	100%	1	1	1	0	1	0.04	1
1597631	R346, K444, G446	346	446	100%	1	1	1	0	1	0.04	1
1595412	R346, A352, N354, R355, K356, E465, R466, D467, I468	346	468	100%	1	1	1	0	1	0.04	1
1597464	R343, N436, N437, L438, D439, S440, K441, V442, G443, G444, P496, T497	346	500	100%	1	1	1	0	1	0.04	1
2134961	R346, A348, A352, W353, N354, R355, R357, Y396, R457, K462, F464, E465, R466, D467, I468, S469, T470, E471	346	471	100%	1	1	1	0	1	0.04	1
2134967	R346, N439, N440, L441, S443, K444, V445, G446, G447, N448, Y449, N450, Q498, P499, T500	346	500	100%	2	2	2	0	1	0.22	1
1642864	R346	346	346	100%	9	0	0	1	0	0	0.27
1642865	R346, N450, L452, E484, F490	346	490	100%	1	1	1	0	1	0.04	1
2134964	R346, F347, S349, Y351, A352, N354, R355, G446, Y449, N450, L452, I468, T470, V483, E484, F490, L492	346	492	100%	1	1	1	0	1	0.04	1
2134968	R346, N439, N440, L441, S443, K444, V445, G446, Y449, N450, L452, E484, F490, Q493, S494, P499	346	499	100%	2	2	2	0	1	0.22	1
1874185	R343	346	346	100%	9	0	0	1	0	0	0.27
2134970	R346, Y351, R355, R357, N450, L452, E465, R466, I468, S469, T470, E471, G482, E484, F490, L492, Q493, S494	346	494	100%	1	1	1	0	1	0.04	1
1972664	R346, Y351, A352, W353, N354, R355, R357, F464, R466, I468, S469, T470, E471, E516, L518, H519, A520	346	520	100%	1	1	1	0	1	0.04	1
1973005	R346, Y351, K444, V445, G446, G447, Y449, N450, L452, I468, T470, G482, E484, F490, L492, Q493, S494	346	494	100%	5	4	1	0	0.8	0.34	0.99
2134969	R346, N440, L441, K444, V445, G446, N448, Y449, Q498	346	498	100%	2	2	2	0	1	0.22	1
2003329	R346, Y351, R403, D405, E406, R408, Q409, K417, K444, Y449, N450, L452, Y453, I468, T470, G482, E484, Y489, F490, L492, Q493, S494, Y505	346	505	100%	4	2	1	0	0.5	0.1	0.89
2116334	R343, F344, A345, S346, Y348, A349, N351, K441, G444, N445, Y446, N447, Y448, L449, R463, I465, T467, K481, F487, L489, Q490, S491	346	494	95.45%	1	1	1	0	1	0.04	1
2134965	R346, F347, S349, Y351, K444, G446, G447, N448, Y449, N450, Y451, L452, T470, E484, F490, L492, Q493, S494	346	494	100%	1	1	1	0	1	0.04	1
2134966	R346, K444, G446, G447, N448, Y449, N450, L452, V483, E484, G485, F490, S494	346	494	100%	1	1	1	0	1	0.04	1
2134962	R346, A348, S349, Y351, A352, W353, N354, K356, Y449, N450, L452, R466, I468, S469, T470, E471, I472, G482, V483, E484, F490, L492	346	492	100%	1	1	1	0	1	0.04	1
2060663	R346, N439, N440, L441, S443, K444, V445, G446, Y449, N450, L452, E484, F490, Q493, S494, P499	346	499	100%	1	1	1	0	1	0.04	1
2134516	R346, A348, S349, Y351, A352, W353, N354, Y449, N450, L452, R466, I468, T470, E471, I472, V483, E484, G485, F490	346	490	100%	1	1	1	0	1	0.04	1
2144559	R346, W353, N354, R355, K356, R357, Y396, Y449, N450, L452, R457, K462, P463, F464, E465, R466, D467, I468, S469, T470, E471, I472, G482, F490, L492, Q493	346	493	100%	5	5	1	0	1	0.55	1
1316312	FASVYAWNR	347	355	100%	2	1	1	0	0.5	0.02	0.97
1329385	FASVYAWNRKRISNCV	347	362	100%	40	1	1	0	0.03	0	0.11
1397116	FASVYAWNRKRISNCVAD	347	364	100%	15	7	1	0	0.47	0.24	0.69
1329378	FASVYAWNRKRI	347	358	100%	1	0	0	1	0	0	0.94
1329383	FASVYAWNRKRISNC	347	361	100%	7	1	1	0	0.14	0.01	0.5
1595410	F347, A348, S349, Y351, N354, R355, Y449, N450, L452, R466, I468, T470, N481, G482, V483, E484, F490, L492, Q493, S494	347	494	100%	1	1	1	0	1	0.04	1
1874102	F344	347	347	100%	9	0	0	1	0	0	0.27
1309094	A348, S349, Y351, A352, G446, Y449, N450, L452, I468, T470, I472, G482, V483, E484, G485, F486, C488, F490, L492, Q493, S494	348	494	100%	1	1	1	0	1	0.04	1
1311650	ASVYAWNRKR	348	357	100%	1	1	1	0	1	0.04	1
1329162	ASVYAWNRKRISNCVA	348	363	100%	40	1	1	0	0.03	0	0.11
1329156	ASVYAWNRKRISN	348	360	100%	2	1	1	1	0.5	0.02	0.97
1544519	ASVYAWNRK	348	356	100%	14	2	2	1	0.14	0.03	0.37
1329154	ASVYAWNRKRIS	348	359	100%	1	0	0	1	0	0	0.94
1642855	A348, N450, L452	348	452	100%	1	1	1	0	1	0.04	1
1874078	A345	348	348	100%	9	0	0	1	0	0	0.27
1972956	ASVYAWNR	348	355	100%	1	1	1	0	1	0.04	1
2135614	A348, L452, E484, S494	348	494	100%	1	1	1	0	1	0.04	1
1325172	SVYAWNRKR	349	357	100%	29	4	4	1	0.14	0.05	0.28
1313713	SVYAWNRKRISNCVA	349	363	100%	104	6	2	3	0.06	0.03	0.12
1334665	S349, G446, G447, N448, Y449, N450, L452, E484, F490, G496	349	496	100%	1	1	1	0	1	0.04	1
1696620	SVYAWNRKRISNCVAD	349	364	100%	40	1	1	0	0.03	0	0.11
1873624	SVYAWNRKRISNC	349	361	100%	1	1	1	0	1	0.04	1
1330147	SVYAWNRKRISN	349	360	100%	18	0	0	2	0	0	0.15
1874190	S346	349	349	100%	9	0	0	1	0	0	0.27
2143518	SVYAWNRKRISNCVADYSV	349	367	100%	1	0	0	1	0	0	0.94
1311525	VYAWNRKRI	350	358	100%	14	3	3	2	0.21	0.06	0.45
1707161	VYAWNRKRISNCVADY	350	365	100%	40	1	1	0	0.03	0	0.11
1543315	VYAWNRKRIS	350	359	100%	4	4	1	0	1	0.47	1
1393593	VYAWNRKRISNCVADYSVL	350	368	100%	1	1	1	0	1	0.04	1
1393660	V350, Y351, A352, W353, N354, R355, K356, R357, I358, S359, N360, C361, S443, K444, V445, G446, G447, N448, Y449, N450, Y451, L452, L455, F456, R457, K458, S459, N460, L461, K462, P463, F464, E465, R466, D467, I468, S469, T470, E471, I472	350	472	100%	1	1	1	0	1	0.04	1
1531279	VYAWNRKRISNC	350	361	100%	1	0	0	1	0	0	0.94
1597847	VYAWN	350	354	100%	1	1	1	0	1	0.04	1
2135018	V350, Y351, A352, W353, N354, R355, K356, R357, I358, S359, N360, I402, E406, K417, Y421, Y453, L455, F456, Y473, A475, G476, S477, T478, E484, G485, F486, N487, C488, Y489, F490, L492, Q493, Q498	350	498	100%	1	1	1	0	1	0.04	1
1874219	V347	350	350	100%	9	0	0	1	0	0	0.27
2133791	VYAWNRKRISNCVAD	350	364	100%	9	1	1	0	0.11	0	0.41
1309143	YAWNRKRISNCVADY	351	365	100%	137	12	7	6	0.09	0.05	0.15
1075118	YAWNRKRISNCVADYSVLYNSASFSTFKCYGVSPTKLNDLCFT	351	393	100%	4	2	1	0	0.5	0.1	0.89
1327895	YAWNRKRI	351	358	100%	9	2	2	0	0.22	0.04	0.54
1338217	Y351, K444, G446, Y449, N450, L452, T470, G485, F486, Y489, F490, L492, Q493, S494, G496, Q498	351	498	100%	1	1	1	0	1	0.04	1
1338218	Y351, Y369, S371, A372, F374, S375, T376, F377, K378, C379, Y380, V382, R408, K417, N437, N440, G446, Y449, N450, L452, F456, T478, E484, F486, Y489, F490, L492, Q493, S494, Y495, Q498, V503, Q506, Y508	351	508	100%	1	1	1	0	1	0.04	1
1346808	Y351, G446, Y449, N450, L452, F456, T470, T478, P479, C480, N481, G482, V483, E484, G485, F486, N487, C488, Y489, F490, P491, L492, Q493, S494	351	494	100%	5	5	1	0	1	0.55	1
1338215	Y351, Y449, L455, T470, N481, G482, V483, E484, G485, F486, C488, Y489, F490, L492, Q493, S494	351	494	100%	4	4	1	0	1	0.47	1
1708500	YAWNRKRISNCVADYS	351	366	100%	43	1	1	1	0.02	0	0.1
1335961	Y351, R403, D405, E406, K417, G446, G447, Y449, N450, L452, Y453, L455, T470, I472, G482, V483, E484, F490, L492, Q493, S494, Q498, N501, G502, Y505	351	505	100%	1	1	1	0	1	0.04	1
1338777	Y351, K444, V445, G446, G447, N448, Y449, N450, L452, T470, E484, F490, L492, Q493, S494, Q498	351	498	100%	1	1	1	0	1	0.04	1
1394158	YAWNRKRISNCVADYSV	351	367	100%	12	2	1	0	0.17	0.03	0.43
1392554	Y351, R403, K417, G446, Y449, L452, F456, T470, E484, G485, F486, Y489, F490, L492, Q493, S494, G496, Q498, T500, N501, Y505	351	505	100%	5	4	1	0	0.8	0.34	0.99
1594758	Y351, Y449, L452, F456, T470, G482, E484, G485, F486, Y489, F490, L492, S494	351	494	100%	1	1	1	0	1	0.04	1
1392521	YAWNRKRISNCVADYSVLYN	351	370	100%	2	1	1	1	0.5	0.02	0.97
1393661	Y351, A352, K444, Y449, N450, L452, Y453, F456, I468, T470, E484, G485, Y489, F490, L492, Q493, S494	351	494	100%	1	1	1	0	1	0.04	1
1624638	YAWNRKRISNCVADYSVL	351	368	100%	32	5	2	0	0.16	0.06	0.29
1556269	Y351, K444, G446, Y449, N450, L452, T470, V483, E484, G485, F486, N487, C488, Y489, F490, L492, Q493, S494, Q498	351	498	100%	1	1	1	0	1	0.04	1
1561286	Y351, K417, G446, G447, Y449, N450, L452, Y453, L455, F456, T470, E484, G485, F486, Y489, F490, L492, Q493, S494, Y495, G496, Q498, Y505	351	505	100%	1	1	1	0	1	0.04	1
1711631	Y351, A352, W353, N360, L368, A419, V433, Y449, N450, D467, C480, E484, C488, F490, S494, R509	351	509	100%	1	1	1	0	1	0.04	1
1860919	Y28, Y126, N127, L129, T147, I149, P156, C157, N158, G159, V160, K161, F163, F167, L169	351	492	93.33%	1	1	1	0	1	0.04	1
2135041	Y351, Y449, N450, L452, L455, F456, R457, T470, I472, N481, G482, V483, E484, G485, F486, N487, C488, Y489, F490, L492, Q493, S494, Y495, G496	351	496	100%	1	1	1	0	1	0.04	1
1862955	Y351, Y449, L455, T470, N481, G482, V483, E484, G485, F486, C488, Y489, F490, L492, Q493, S494	351	494	100%	2	2	2	0	1	0.22	1
2135040	Y351, Y449, N450, L452, L455, F456, T470, I472, G482, V483, E484, G485, F486, C488, Y489, F490, L492, Q493, S494	351	494	100%	1	1	1	0	1	0.04	1
1874232	Y348	351	351	100%	9	0	0	1	0	0	0.27
2135037	Y351, R403, K417, G446, G447, Y449, L452, L455, T470, G485, F486, N487, Y489, F490, L492, Q493, S494, Q498, N501, Y505	351	505	100%	8	8	1	0	1	0.69	1
1972665	Y351, W353, N354, R355, R357, Y396, R457, S459, N460, K462, P463, F464, E465, R466, I468, S469, T470, E471, E516, L518, A520	351	520	100%	1	1	1	0	1	0.04	1
2135038	Y351, Y449, L455, T470, N481, G482, V483, E484, G485, F486, C488, Y489, F490, L492, Q493, S494	351	494	100%	1	1	1	0	1	0.04	1
2135039	Y351, Y449, N450, L452, L455, F456, G482, V483, E484, G485, F486, Y489, F490, L492, Q493, S494	351	494	100%	1	1	1	0	1	0.04	1
2061162	Y351, K444, N448, Y449, N450, Y451, L452, Y453, R454, G482, Y489, F490, L492, Q493, S494, G496, F497, Q498	351	498	100%	6	5	1	0	0.83	0.42	0.99
2115975	Y351, G446, G447, Y449, N450, L452, T470, E484, F490, L492, Q493, S494, Y495, G496, Q498	351	498	100%	1	1	1	0	1	0.04	1
2116311	YAWNRKRISNCVADYSVLYNSA	351	372	100%	36	1	1	0	0.03	0	0.12
2133983	Y348, K441, G443, G444, Y446, N447, L449, L452, T467, I469, C477, N478, G479, V480, F483, N484, C485, Y486, F487, L489, Q490, S491	351	494	100%	1	1	1	0	1	0.04	1
1311654	AWNRKR	352	357	100%	1	1	1	0	1	0.04	1
1647012	AWNRKRISNCVADYSV	352	367	100%	40	0	0	1	0	0	0.07
1329173	AWNRKRISNCVADYS	352	366	100%	47	7	2	1	0.15	0.07	0.26
1874079	A349	352	352	100%	9	0	0	1	0	0	0.27
2060961	AWNRKRISNCVADYSVLYNSASFST	352	376	100%	1	1	1	0	1	0.04	1
1087794	WNRKRISNCVADYSVLYN	353	370	100%	20	0	0	1	0	0	0.13
1313960	WNRKRISNCVADYSV	353	367	100%	69	5	4	2	0.07	0.03	0.16
1707985	WNRKRISNCVADYSVL	353	368	100%	40	0	0	1	0	0	0.07
1346826	W353, N354, R355, K356, R357, S359, N360, N394, Y396, P426, D428, K462, P463, F464, E465, R466, I468, E516, L518, H519, A520, T523	353	523	100%	1	1	1	0	1	0.04	1
1391791	W353, R355, R357, Y396, P426, D427, D428, F429, K462, P463, F464, R466, S514, E516, L518, H519, A520, P521	353	521	100%	7	5	2	0	0.71	0.34	0.94
1532692	WNRKRISNCVADYSVLYNS	353	371	100%	1	1	1	0	1	0.04	1
1532691	WNRKRISNCVAD	353	364	100%	1	0	0	1	0	0	0.94
2135023	W353, N354, R355, R357, Y449, N450, L452, R457, P463, F464, E465, R466, D467, I468, S469, T470, I472, G482, E484, F490, L492	353	492	100%	1	1	1	0	1	0.04	1
2135026	W353, R355, Y396, R457, K462, P463, F464, E465, R466, D467, I468, E516, L518	353	518	100%	1	1	1	0	1	0.04	1
1860918	W30, N31, R32, K33, R34, S36, N37, N71, Y73, P103, D105, K139, P140, F141, E142, R143, I145, E193, L195, H196, A197, T200	353	523	100%	1	1	1	0	1	0.04	1
2135025	W353, R355, T393, N394, Y396, P426, D427, D428, F429, T430, K462, P463, F464, S514, F515, E516, L518, H519, A520, P521	353	521	100%	1	1	1	0	1	0.04	1
1870579	WNRKRISNCVADYSVLYNSA	353	372	100%	1	1	1	0	1	0.04	1
2000950	W353, N354, R355, K356, R357, S359, N360, Y396, P426, D428, K462, P463, F464, E465, R466, I468, E516, L518, H519, A520, T523	353	523	100%	1	1	1	0	1	0.04	1
2135024	W353, R355, R357, Y396, P426, D427, D428, F429, K462, P463, F464, R466, S514, E516, L518, H519, A520, P521	353	521	100%	1	1	1	0	1	0.04	1
2116330	W353, N354, R355, R357, Y396, P426, K462, P463, F464, E465, R466, D467, I468, S469, S514, E516, L518	353	518	100%	1	1	1	0	1	0.04	1
2116342	W350, N351, R352, K353, R354, Y393, P423, D425, K459, P460, F461, E462, R463, I465, S466, S511, E513	353	516	100%	1	1	1	0	1	0.04	1
2135612	W351, R353, R355, T391, N392, Y394, P424, D425, D426, K460, P461, F462, E463, R464, E514, L516, H517	353	519	100%	1	1	1	0	1	0.04	1
2135625	W353, R355, R357, N394, Y396, P426, D427, D428, K462, P463, F464, R466, E516, L518, H519, A520	353	520	100%	1	1	1	0	1	0.04	1
1087821	N354	354	354	100%	1	1	1	0	1	0.04	1
1309538	NRKRISNCVADYSVLYNSAS	354	373	100%	120	0	0	1	0	0	0.03
1335936	N354, F377, I468	354	468	100%	1	1	1	0	1	0.04	1
1335937	N354, K356, I468	354	468	100%	1	1	1	0	1	0.04	1
1683415	NRKRISNCVADYSVLY	354	369	100%	40	0	0	1	0	0	0.07
1541817	NRKRISNCVAD	354	364	100%	3	3	1	0	1	0.37	1
1483468	NRKRISNCVADY	354	365	100%	1	0	0	1	0	0	0.94
2134940	N354, R355, R357, D428, L461, K462, P463, F464, E465, R466	354	466	100%	5	4	1	0	0.8	0.34	0.99
1874157	N351	354	354	100%	9	0	0	1	0	0	0.27
2116027	N354, R355, K356, R357, S359, F464, E465, R466, D467, I468, S469	354	469	100%	1	1	1	0	1	0.04	1
2125711	NRKRISNCVADYSVL	354	368	100%	9	1	1	0	0.11	0	0.41
1311810	RKRISNCV	355	362	100%	1	1	1	0	1	0.04	1
1690557	RKRISNCVADYSVLYN	355	370	100%	40	0	0	1	0	0	0.07
1542282	RKRISNCVAD	355	364	100%	1	1	1	0	1	0.04	1
1498477	RKRISNCVADYS	355	366	100%	18	17	1	1	0.94	0.76	1
1542283	RKRISNCVADYSVLY	355	369	100%	53	4	2	1	0.08	0.03	0.18
2134971	R355, R457, S459, K462, P463, F464, E465, R466, D467, I468, S469, E471, Q474, P479, C480, N481, G482, L518	355	518	100%	1	1	1	0	1	0.04	1
1690556	RKRISNCVA	355	363	100%	3	0	0	1	0	0	0.61
1862247	RKRISNCVADYSVLYNSASFSTFKCYGVSPT	355	385	100%	1	0	0	1	0	0	0.94
2060703	R352, R354, T390, N391, Y393, P423, D425, F426, T427, K459, P460, F461, E462, S511, F512, E513, L514, L515, H516, A517	355	520	100%	1	1	1	0	1	0.04	1
1310551	KRISNCVADYSVLYN	356	370	100%	67	9	5	2	0.13	0.07	0.24
1671897	KRISNCVADYSVLYNS	356	371	100%	43	1	1	1	0.02	0	0.1
1541116	KRISNCVADYSVLYNSASFS	356	375	100%	1	1	1	0	1	0.04	1
1874132	K353	356	356	100%	9	0	0	1	0	0	0.27
1075029	RISNCVADY	357	365	100%	36	4	1	0	0.11	0.04	0.23
1313442	RISNCVADYSVLYNS	357	371	100%	67	2	1	3	0.03	0.01	0.1
1690431	RISNCVADYSVLYNSA	357	372	100%	40	0	0	1	0	0	0.07
1873332	RISNCVADYSVLY	357	369	100%	1	1	1	0	1	0.04	1
1498219	RISNCVADYSVLYNSASFS	357	375	100%	1	1	1	0	1	0.04	1
1874186	R354	357	357	100%	21	3	1	1	0.14	0.04	0.32
1668126	ISNCVADYSVLYNSAS	358	373	100%	40	2	1	0	0.05	0.01	0.14
1393855	ISNCVADYSVLYNSASF	358	374	100%	1	0	0	1	0	0	0.94
1608726	ISNCVADYSVLYNSASFS	358	375	100%	32	6	2	0	0.19	0.08	0.33
1860839	ISNCVADYSVLYNSA	358	372	100%	55	4	2	1	0.07	0.03	0.17
1870742	I358, S359, N360, C361, V362, A363, D364, I434, A435, W436, N437, S438, N439, N440, L441, D442, S443, K444, V445, G446, G447, N448, Y449, N450, Y451, L452, Y453, R454, L455	358	455	100%	5	5	1	0	1	0.55	1
1874125	I355	358	358	100%	9	0	0	1	0	0	0.27
1694711	SNCVADYSVLYNSASF	359	374	100%	40	1	1	0	0.03	0	0.11
1542531	SNCVADYSVLYNSAS	359	373	100%	15	1	1	1	0.07	0	0.27
1874191	S356	359	359	100%	9	0	0	1	0	0	0.27
1681100	NCVADYSVLYNSASFS	360	375	100%	40	0	0	1	0	0	0.07
1397372	NCVADYSFLYNSASF	360	374	93.33%	1	1	1	0	1	0.04	1
1597762	NCVADYSVLYNSASFSTFKC	360	379	100%	7	0	0	2	0	0	0.33
1874158	N357	360	360	100%	9	0	0	1	0	0	0.27
1069291	CVADYSVLYNSASFS	361	375	100%	188	7	4	10	0.04	0.02	0.07
1087470	CVADYSVLYNSASFSTFK	361	378	100%	20	0	0	1	0	0	0.13
1314082	C361, Y365, F374, T376, K378, V382, S383, P384, F392, A411	361	411	100%	1	1	1	0	1	0.04	1
7247	CVADYSVLY	361	369	100%	26	8	5	0	0.31	0.16	0.48
1649116	CVADYSVLYNSASFST	361	376	100%	43	0	0	2	0	0	0.06
1392096	CVADYSVLYNSASFSTFKCY	361	380	100%	2	1	1	1	0.5	0.02	0.97
1418474	CVADYSVLYNSA	361	372	100%	2	1	1	1	0.5	0.02	0.97
1701476	VADYSVLYNSASFSTF	362	377	100%	40	0	0	1	0	0	0.07
1392485	VADYSVLYNSASFST	362	376	100%	3	0	0	3	0	0	0.61
1596399	VADYSVLYNSASFSTFKCYGVSPTK	362	386	100%	52	52	1	0	1	0.93	1
1874220	V359	362	362	100%	9	0	0	1	0	0	0.27
2061137	VADYSVLYNLAPFFTFKCYGV	362	382	85.71%	7	0	0	1	0	0	0.33
2061138	VADYSVLYNSASFSTFKCYGV	362	382	100%	7	7	1	0	1	0.65	1
1643563	ADYSVLYNSASFSTFK	363	378	100%	20	1	1	0	0.05	0	0.21
1407731	ADYSVLYNSASF	363	374	100%	1	1	1	0	1	0.04	1
1539410	ADYSVLYNSASFSTF	363	377	100%	9	2	1	1	0.22	0.04	0.54
1874080	A360	363	363	100%	9	0	0	1	0	0	0.27
2134411	ADYSVLYNLAPFFTF	363	377	80%	2	1	1	0	0.5	0.02	0.97
2135430	ADYSVLYNSASFSTFKCYGV	363	382	100%	1	1	1	0	1	0.04	1
1653171	DYSVLYNSASFSTFKC	364	379	100%	40	0	0	1	0	0	0.07
1330442	DYSVLYNSASFSTFK	364	378	100%	46	2	1	1	0.04	0.01	0.13
1874089	D361	364	364	100%	9	0	0	1	0	0	0.27
2135452	DYSVLYNSASFSTFKCYGVS	364	383	100%	2	1	1	1	0.5	0.02	0.97
1075125	YSVLYNSASFSTFK	365	378	100%	36	5	1	0	0.14	0.06	0.26
1314093	Y365, Y369, N370, A372, F374, K378, P384	365	384	100%	1	1	1	0	1	0.04	1
1314047	YSVLYNSASFSTFKC	365	379	100%	58	0	0	3	0	0	0.06
1334443	Y365, Y369, S371, A372, S373, F374, S375, T376, F377, K378, Y380, S383, P384, T385, G404, D405, V407, R408, P412, G413, Q414, N437, V503, G504	365	504	100%	1	1	1	0	1	0.04	1
1710840	YSVLYNSASFSTFKCY	365	380	100%	40	0	0	1	0	0	0.07
1336269	Y365	365	365	100%	11	1	1	0	0.09	0	0.35
1394178	YSVLYNSASFSTFKCYG	365	381	100%	1	0	0	1	0	0	0.94
1625177	YSVLYNSASFSTFKCYGV	365	382	100%	32	2	2	0	0.06	0.01	0.18
1874233	Y362	365	365	100%	9	0	0	1	0	0	0.27
2061152	YSVLYNSASFSTFKCYGVSPTKLND	365	389	100%	1	0	0	1	0	0	0.94
2116031	Y365, T376, F377, K378, C379, Y380, G381, V382, S383, T385, K386, A411, G413, Q414, D427, D428, F429, T430	365	430	100%	1	1	1	0	1	0.04	1
2130782	Y365, P384, E484, G485, F490	365	490	100%	8	1	1	0	0.13	0.01	0.46
2116318	YSVLYNSASFSTFKCYGVSPTK	365	386	100%	36	17	1	0	0.47	0.33	0.61
1310828	SVLYNSASFSTFKCY	366	380	100%	70	3	3	3	0.04	0.01	0.12
1334483	SVLYNSASFSTFKCYG	366	381	100%	63	3	1	2	0.05	0.02	0.13
1391790	S366, Y369, N370, F374, F377, C379, Y380, G381, V382, S383, P384, T385, K386, N388, L390, F392, P412, D427, D428, F429, L517	366	517	100%	1	1	1	0	1	0.04	1
1392439	SVLYNSASF	366	374	100%	1	1	1	0	1	0.04	1
1542626	SVLYNSASFSTFKCYGVSPT	366	385	100%	1	1	1	0	1	0.04	1
1874192	S363	366	366	100%	9	0	0	1	0	0	0.27
2060687	SVLYNSASFSTFKCYGVSPTKLNDLCFTNV	366	395	100%	1	1	1	0	1	0.04	1
1073903	VLYNSASFSTFKCYG	367	381	100%	58	2	2	3	0.03	0.01	0.12
1704561	VLYNSASFSTFKCYGV	367	382	100%	40	0	0	1	0	0	0.07
1526436	VLYNSASFSTFK	367	378	100%	2	2	2	0	1	0.22	1
2135019	V367, N439	367	439	100%	1	1	1	0	1	0.04	1
2135020	V367, N439, Y453	367	453	100%	1	1	1	0	1	0.04	1
1597840	VLYNSASFSTFKCYGVSPTKLNDLC	367	391	100%	7	1	1	0	0.14	0.01	0.5
1874221	V364	367	367	100%	9	0	0	1	0	0	0.27
1330526	LYNSASFSTF	368	377	100%	8	1	1	1	0.13	0.01	0.46
1679190	LYNSASFSTFKCYGVS	368	383	100%	40	0	0	1	0	0	0.07
1392551	L368, Y369, S371, A372, F374, S375, T376, F377, K378, P384, R408, N437, N440, V503, Q506, Y508	368	508	100%	1	1	1	0	1	0.04	1
1393658	L368, Y369, N370, S371, A372, S373, F374, S375, T376, F377, K378, S383, P384, G404, D405, R408, V503, G504, Y508	368	508	100%	1	1	1	0	1	0.04	1
2134922	L368, Y369, N370, S371, A372, F374, S375, T376, F377, K378, C379, Y380, G381, S383, P384, T385, R408, D427, D428, F429	368	429	100%	1	1	1	0	1	0.04	1
1561285	L368, Y369, S371, A372, F374, S375, T376, F377, K378, G404, D405, V407, R408, V503, G504, Y508	368	508	100%	1	1	1	0	1	0.04	1
1874143	L365	368	368	100%	9	0	0	1	0	0	0.27
997006	Y369, N370, S371, A372, F374, F377, K378, C379, Y380, G381, V382, S383, P384, T385, K386, L390, F429, T430, F515, E516, L517	369	517	100%	2	2	2	0	1	0.22	1
1074327	Y369, N370, A372, F374, T376, F377, K378, Y380, V382, P384, T385, K386, D389, L390, F392, D428, F429, T430, F515, L517, H519	369	519	100%	1	1	1	0	1	0.04	1
1087186	Y369, N370, S375, T376, F377, K378, C379, Y380, G381, V382, S383, P384, T385, K386, L390, F392, D428, T430, E516, L517	369	517	100%	2	2	2	0	1	0.22	1
1087269	Y369, N370, F374, S375, T376, F377, K378, C379, Y380, G381, V382, S383, P384, T385, K386, L390, F392, D428, T430, L517	369	517	100%	1	1	1	0	1	0.04	1
1309150	Y369, N370, F374, S375, T376, F377, K378, C379, Y380, G381, V382, S383, P384, T385, K386, L390, R408, D428, T430, L517, L518	369	518	100%	1	1	1	0	1	0.04	1
1307796	Y369, S375, F377, K378, C379, Y380, G381, V382, S383, P384, T385, K386, F392, P412, G413, D427, D428, F429, L517	369	517	100%	1	1	1	0	1	0.04	1
1855264	Y369, A372, S373, F374, S375, T376, F377, K378, C379, Y380, S383, P384, T385, K386, D405, V407, R408, A411, P412, G413, Q414, N437, V503	369	503	100%	1	1	1	0	1	0.04	1
1087806	YNSASFSTFKCYGVSPTK	369	386	100%	20	0	0	1	0	0	0.13
1311252	Y369, N370, F377, K378, C379, Y380, G381, V382, S383, P384, T385, K386, N388, L390, F392, P412, Q414, D427, D428, F429, T430, L517	369	517	100%	42	32	1	0	0.76	0.63	0.86
1311253	Y369, N370, S371, A372, F374, S375, T376, F377, K378, C379, S383, P384, T385, R408, Q414	369	414	100%	43	34	2	0	0.79	0.66	0.88
1311528	YNSASFSTFKCYGVSPTKLNDL	369	390	100%	1	0	0	1	0	0	0.94
1314022	YNSASFSTFKCYGVS	369	383	100%	58	0	0	3	0	0	0.06
2135063	Y369, S371, A372, F374, T376, F377, K378, C379, Y380, G381, S383, P384, T385, K386, L390, F392, D428, F429, T430, L517	369	517	100%	1	1	1	0	1	0.04	1
1335411	Y369, N370, S371, A372, F374, S375, T376, F377, K378, C379, Y380, V382, S383, P384, T385, R403, G404, D405, V407, R408, Q409, I410, A411, P412, G413, Q414, T415, V433, N437, T500, N501, G502, V503, G504, Y505, Q506, Y508	369	508	100%	1	1	1	0	1	0.04	1
1334437	Y369, N370, S371, A372, S373, F374, S375, T376, F377, K378, C379, Y380, S383, P384, T385, K386, G404, R408, A411, P412, Y508	369	508	100%	1	1	1	0	1	0.04	1
1594118	YNSASFSTFKCYGVSPTKLNDLCFT	369	393	100%	1	1	1	0	1	0.04	1
1338219	Y369, N370, S371, A372, S373, F374, S375, T376, F377, K378, C379, Y380, V382, P384, R408, Q414, N437, N439, N440, V503, Q506, Y508	369	508	100%	1	1	1	0	1	0.04	1
1338220	Y369, N370, S371, A372, S373, F374, S375, T376, F377, K378, S383, P384, N437, V503, Y508	369	508	100%	1	1	1	0	1	0.04	1
1338221	Y369, N370, S371, A372, S373, F374, S375, T376, F377, K378, S383, P384, T385, R408, V503, G504, Y508	369	508	100%	1	1	1	0	1	0.04	1
1346809	Y369, N370, S371, A372, F374, S375, T376, F377, K378, C379, S383, P384, D405, R408, Q409, Q414, T415, G416, N501, V503, G504, Y505	369	505	100%	5	5	1	0	1	0.55	1
1338222	Y369, S371, F377, K378, C379, Y380, G381, V382, S383, P384, T385, R408, P412, G413, Q414, T415, G416, D427, D428, F429	369	429	100%	3	3	3	0	1	0.37	1
1710228	YNSASFSTFKCYGVSP	369	384	100%	20	1	1	0	0.05	0	0.21
1335962	Y369, N370, A372, F374, S375, T376, F377, K378, C379, P384, T385, R408	369	408	100%	1	1	1	0	1	0.04	1
1346704	Y369, N370, S371, F377, K378, C379, Y380, G381, V382, S383, P384, T385, R408, P412, G413, Q414, T415, G416, D427, D428, F429	369	429	100%	1	1	1	0	1	0.04	1
1336270	Y369	369	369	100%	11	1	1	0	0.09	0	0.35
1338790	Y369, N370, S375, T376, F377, K378, C379, Y380, G381, V382, S383, P384, T385, K386, L390, F392, R408, T430, L517	369	517	100%	1	1	1	0	1	0.04	1
1391795	Y369, N370, S371, A372, F374, S375, T376, F377, K378, C379, Y380, V382, S383, P384, T385, G404, D405, R408, T500, N501, G502, V503, G504, Q506	369	506	100%	7	7	2	0	1	0.65	1
1594759	Y369, S371, A372, F374, S375, T376, F377, K378, C379, V382, S383, P384, R403, G404, D405, R408, N501, G502, V503, G504, Y505, Y508	369	508	100%	1	1	1	0	1	0.04	1
1594760	Y369, S375, F377, K378, C379, Y380, G381, V382, S383, P384, T385, K386, L390, C391, F392, P412, D427, D428, F429, L517, K528	369	528	100%	1	1	1	0	1	0.04	1
1392580	Y369, N370, F374, S375, T376, F377, K378, C379, Y380, G381, V382, S383, P384, T385, K386, F429, T430, F515, L517	369	517	100%	1	1	1	0	1	0.04	1
1398140	Y369, N370, A372, F374, K378, P384	369	384	100%	1	1	1	0	1	0.04	1
2135048	Y369, N370, A372, F374, S375, T376, F377, K378, T385, G404, R408, I410, N437, N440, V503, Y508	369	508	100%	1	1	1	0	1	0.04	1
1397230	Y369, N370, S371, A372, F374, S375, T376, F377, K378, C379, S383, P384, T385, R408, Q414	369	414	100%	1	1	1	0	1	0.04	1
1397512	YNSASFSTF	369	377	100%	4	0	0	1	0	0	0.51
1556270	Y369, A372, S373, F374, S375, T376, F377, K378, C379, P384, R408, N437, G502, V503, Q506, Y508	369	508	100%	1	1	1	0	1	0.04	1
1556271	Y369, A372, S375, K378, C379, S383, P384, G404, D405, R408, Q414, G502, V503, G504, Y508	369	508	100%	1	1	1	0	1	0.04	1
1597634	Y369, N370, F374, S375, T376, F377, K378, C379, Y380, G381, V382, S383, P384, K386, D389, L390, D428, T430, L517	369	517	100%	1	1	1	0	1	0.04	1
1595413	Y369, N370, S371, A372, F374, S375, T376, F377, K378, R408, N437	369	437	100%	1	1	1	0	1	0.04	1
1597860	YNSASFSTFKCYGVSPTKLN	369	388	100%	75	2	1	0	0.03	0.01	0.09
1597635	Y366, S368, F371, S372, T373, F374, K375, C376, Y377, G378, V379, S380, P381, T382, G401, D402, V404, R405, V500, G501, Y505	369	508	100%	1	1	1	0	1	0.04	1
1597642	Y369, N370, S371, F374, S375, T376, F377, K378, C379, Y380, G381, V382, S383, P384, T385, G404, D405, V407, R408, V503, G504, Y508	369	508	100%	1	1	1	0	1	0.04	1
1597643	Y369, S371, A372, F374, S375, T376, F377, K378, C379, Y380, G381, V382, S383, P384, T385, P412, Q414, D427	369	427	100%	1	1	1	0	1	0.04	1
2135061	Y369, S371, A372, F374, S375, F377, K378, C379, Y380, G381, V382, S383, P384, T385, V407, R408, P412, G413, D427, D428, F429, T430, V503, G504	369	504	100%	1	1	1	0	1	0.04	1
2135067	Y369, S371, F377, K378, C379, Y380, G381, V382, S383, P384, T385, R408, P412, G413, Q414, T415, G416, D427, D428, F429, T430	369	430	100%	2	2	2	0	1	0.22	1
2135064	Y369, S371, A372, F377, K378, C379, Y380, G381, V382, S383, P384, R408, P412, G413, Q414, T415, D420, D427, N460	369	460	100%	3	3	3	0	1	0.37	1
2135050	Y369, N370, S371, A372, F374, F377, K378, C379, Y380, G381, V382, S383, P384, T385, K386, L390, F429, T430, F515, E516, L517	369	517	100%	2	2	2	0	1	0.22	1
2135051	Y369, N370, S371, A372, F374, S375, T376, F377, K378, C379, P384, T385, N388	369	388	100%	1	1	1	0	1	0.04	1
2135046	Y369, F374, S375, T376, F377, K378, C379, Y380, P384, G404, D405, V407, R408, Q414, V503, G504, Y508	369	508	100%	1	1	1	0	1	0.04	1
2135042	Y369, A372, F374, S375, T376, F377, K378, C379, Y380, G381, V382, S383, P384, T385, K386, P412, G413, D427, V503	369	503	100%	1	1	1	0	1	0.04	1
2135058	Y369, N370, S371, F377, K378, C379, Y380, G381, V382, S383, P384, T385, R408, Q409, P412, G413, Q414, T415, G416, D427, D428, F429	369	429	100%	1	1	1	0	1	0.04	1
2135055	Y369, N370, S371, A372, S373, F374, S375, T376, F377, K378, C379, Y380, V382, S383, P384, T385, K386, L387, G404, D405, R408, Q409, G502, V503, G504, Q506, Y508	369	508	100%	1	1	1	0	1	0.04	1
1862956	Y369, N370, S371, A372, S373, F374, S375, T376, F377, K378, C379, S383, P384, T385, N437	369	437	100%	1	1	1	0	1	0.04	1
1864104	Y366, P370, F372, F374, K375, C376, Y377, G378, V379, S380, P381, T382, K383, L387, F389, P409, Q411, D424, D425, F426	369	429	90%	1	1	1	0	1	0.04	1
2135062	Y369, S371, A372, F374, S375, T376, F377, K378, C379, V382, S383, P384, R403, G404, D405, R408, N501, G502, V503, G504, Y505, Y508	369	508	100%	1	1	1	0	1	0.04	1
2135049	Y369, N370, F374, S375, T376, F377, K378, C379, Y380, G381, V382, S383, P384, T385, K386, L390, R408, D428, T430, L517, L518	369	518	100%	1	1	1	0	1	0.04	1
2135052	Y369, N370, S371, A372, F374, S375, T376, F377, K378, C379, S383, P384, D405, R408, Q409, Q414, T415, G416, N501, V503, G504, Y505	369	505	100%	2	2	2	0	1	0.22	1
2135054	Y369, N370, S371, A372, F374, S375, T376, F377, K378, C379, Y380, V382, S383, P384, T385, G404, D405, R408, T500, N501, G502, V503, G504, Q506	369	506	100%	2	2	2	0	1	0.22	1
2135056	Y369, N370, S371, F374, S375, T376, F377, K378, R403, G404, D405, R408, N439, Y453, Q498, P499, T500, N501, G502, V503, G504, Y505, Q506, Y508	369	508	100%	1	1	1	0	1	0.04	1
1945257	Y369, S371, F377, K378, C379, Y380, G381, V382, S383, P384, T385, R408, Q409, P412, G413, Q414, T415, G416, D427, D428, F429	369	429	100%	1	1	1	0	1	0.04	1
1945265	Y366, S368, A369, F374, K375, C376, Y377, G378, V379, S380, P381, T382, R405, Q406, P409, G410, Q411, T412, G413, D424, D425, F426	369	429	100%	1	1	1	0	1	0.04	1
1874234	Y366	369	369	100%	9	0	0	1	0	0	0.27
1957844	Y369, N370, A372, F374, S375, T376, F377, K378, C379, Y380, S383, G404, D405, V407, R408, A411, P412, G413, Q414, T415, D427, Y508	369	508	100%	1	1	1	0	1	0.04	1
2001407	YNSASFSTFKCYGVSPTKLNDLCF	369	392	100%	1	0	0	1	0	0	0.94
2135045	Y369, A372, S375, K378, C379, S383, P384, G404, D405, R408, Q414, G502, V503, G504, Y508	369	508	100%	1	1	1	0	1	0.04	1
2135047	Y369, F377, K378, C379, Y380, G381, V382, S383, P384, T385, K386, D389, L390, P412, Q414, D427, D428, F429	369	429	100%	1	1	1	0	1	0.04	1
2135057	Y369, N370, S371, F377, K378, C379, Y380, G381, V382, S383, P384, T385, D405, R408, Q409, P412, G413, Q414, T415, G416, D427, D428, F429, Y505	369	505	100%	8	8	1	0	1	0.69	1
2135059	Y369, N370, S375, T376, F377, K378, C379, Y380, G381, V382, S383, P384, T385, K386, L390, F392, D428, T430, E516, L517	369	517	100%	1	1	1	0	1	0.04	1
2135065	Y369, S371, F377, K378, C379, Y380, G381, V382, S383, P384, T385, R408, P412, G413, Q414, T415, G416, D427, D428, F429	369	429	100%	1	1	1	0	1	0.04	1
2060926	Y369, N370, A372, F374, S375, T376, K378, C379, G404, D405, V407, R408, G502, V503, G504, Y508	369	508	100%	8	8	1	0	1	0.69	1
2135043	Y369, A372, S373, F374, S375, T376, F377, K378, C379, Y380, G381, V382, P384, G404, D405, R408, P412, Q414, V503, G504, Y508	369	508	100%	1	1	1	0	1	0.04	1
2116338	Y366, S368, F371, S372, T373, F374, K375, C376, Y377, G378, V379, S380, P381, T382, K383, G401, D402, R405, V500, G501	369	504	100%	1	1	1	0	1	0.04	1
2135060	Y369, S371, A372, F374, F377, K378, C379, Y380, G381, V382, S383, P384, T385, R408, P412, G413, Q414, T415, D427, D428, F429	369	429	100%	1	1	1	0	1	0.04	1
2061159	Y366, A369, P370, F371, F372, T373, K375, Y377, S380, P381, T382, K383, G401, D402, V404, R405, I407, A408, V430, A432, V500, G501, Y505, V507	369	510	91.67%	1	1	1	0	1	0.04	1
2135044	Y369, A372, S373, F374, S375, T376, F377, K378, C379, Y380, S383, P384, T385, K386, D405, V407, R408, A411, P412, G413, Q414, N437, V503	369	503	100%	1	1	1	0	1	0.04	1
2135053	Y369, N370, S371, A372, F374, S375, T376, F377, K378, C379, S383, P384, T385, R408, Q414	369	414	100%	1	1	1	0	1	0.04	1
2135066	Y369, S371, F377, K378, C379, Y380, G381, V382, S383, P384, T385, R408, P412, G413, Q414, T415, G416, D427, D428, F429	369	429	100%	1	1	1	0	1	0.04	1
2135068	Y369, S375, F377, K378, C379, Y380, G381, V382, S383, P384, T385, K386, F392, P412, G413, D427, D428, F429, L517	369	517	100%	1	1	1	0	1	0.04	1
2116032	Y369, F374, S375, T376, F377, K378, C379, Y380, G381, V382, S383, P384, T385, K386, R408, A411, P412, G413, Q414, D427, D428, F429	369	429	100%	1	1	1	0	1	0.04	1
2116033	Y369, F377, K378, C379, Y380, G381, V382, S383, P384, R408, A411, P412, G413, Q414, D427, D428, F429, T430	369	430	100%	1	1	1	0	1	0.04	1
2116034	Y369, S371, S375, T376, F377, K378, C379, Y380, V382, S383, P384, T385, G404, V407, R408, Q414, V503, Y508	369	508	100%	1	1	1	0	1	0.04	1
2116035	Y369, S375, F377, K378, C379, Y380, G381, V382, S383, P384, T385, R408, A411, P412, G413, Q414, D427, D428	369	428	100%	1	1	1	0	1	0.04	1
2060665	Y369, N370, S371, A372, F374, S375, T376, F377, K378, C379, S383, P384, D405, R408, Q409, Q414, T415, G416, N501, V503, G504, Y505	369	505	100%	1	1	1	0	1	0.04	1
2060666	Y369, N370, S371, A372, F374, S375, T376, F377, K378, C379, Y380, V382, S383, P384, T385, G404, D405, R408, T500, N501, G502, V503, G504, Q506	369	506	100%	1	1	1	0	1	0.04	1
2116326	Y369, S371, A372, F374, S375, T376, F377, K378, C379, Y380, V382, S383, P384, G404, D405, R408, P412, D427, V503, G504, Y508	369	508	100%	4	4	1	0	1	0.47	1
2116327	Y369, S371, A372, F374, S375, T376, F377, K378, C379, Y380, V382, S383, P384, R408, V503	369	503	100%	1	1	1	0	1	0.04	1
2116408	Y369, S371, A372, F377, K378, C379, Y380, G381, V382, S383, P384, T385, D405, E406, R408, Q409, A411, P412, Q414, T415, G416, D420	369	420	100%	1	1	1	0	1	0.04	1
2134520	Y366, N367, F371, F372, T373, F374, K375, C376, Y377, V379, S380, P381, G401, D402, R405, V500, G501, H502, Y505	369	508	89.47%	1	1	1	0	1	0.04	1
2130774	Y366, N367, F371, F374, K375, C376, Y377, G378, V379, S380, P381, T382, K383, L387, P409, Q411, D424, D425, F426, L514, K525	369	528	100%	1	1	1	0	1	0.04	1
2135613	Y367, N368, A370, F372, S373, T374, F375, K376, T383, G402, D403, R406, P410, G411, Q412, G502	369	504	100%	1	1	1	0	1	0.04	1
2135626	Y369, N370, S371, A372, F374, S375, T376, F377, K378, P384, T385, G404, D405, R408, P412, G413, Q414, G504	369	504	100%	1	1	1	0	1	0.04	1
1313244	NSASFSTFK	370	378	100%	23	3	3	2	0.13	0.03	0.3
1329831	NSASFSTFKCYGVSPT	370	385	100%	40	0	0	1	0	0	0.07
1393659	N370, S371, A372, S373, F374, S375, T376, F377, K378, C379, Y380, G381, V382, S383, P384, T385, K386, L387, Y489, F490, P491, L492, Q493, S494, Y495, G496, F497, Q498, P499, T500, N501, G502, V503, G504, Y505, Q506, P507, Y508, R509, V510, V511, V512, L513, S514	370	514	100%	1	1	1	0	1	0.04	1
1625417	NSASFSTFKCYGVSPTKLNDLCFTNV	370	395	100%	20	6	1	0	0.3	0.14	0.5
1329829	NSASFSTFKCYGVSP	370	384	100%	46	0	0	2	0	0	0.06
1874159	N367	370	370	100%	9	0	0	1	0	0	0.27
1329833	NSASFSTFKCYGVSPTKL	370	387	100%	1	1	1	0	1	0.04	1
2001220	NLAPFFTFKCYGVSPTKL	370	387	83.33%	1	1	1	0	1	0.04	1
2116409	N368, S369, F375, K376, C377, Y378, S381, P382, T383, R401, D403, E404, R406, Q407, A409, P410, Q412, T413, G414, D418, D425, Y503	370	505	100%	1	1	1	0	1	0.04	1
1310787	SASFSTFKCYGVSPT	371	385	100%	112	16	7	4	0.14	0.09	0.22
1333450	SASFSTFKCY	371	380	100%	6	1	1	0	0.17	0.01	0.56
1330052	SASFSTFKCYGVSPTK	371	386	100%	43	0	0	2	0	0	0.06
1392415	SASFSTFKCYGVSPTKLNDL	371	390	100%	2	0	0	2	0	0	0.76
1501918	SASFSTFKCYGV	371	382	100%	1	1	1	0	1	0.04	1
1594764	S371, A372, S373, F374, S375, F377, K378, G404, D405, V407, R408, G502, V503, Y505, Y508	371	508	100%	1	1	1	0	1	0.04	1
1874193	S368	371	371	100%	9	0	0	1	0	0	0.27
1125015	A372, F374, C379	372	379	100%	1	1	1	0	1	0.04	1
1646124	ASFSTFKCYGVSPTKL	372	387	100%	40	0	0	1	0	0	0.07
1393694	ASFSTFKCYGVSPTKLN	372	388	100%	12	1	1	0	0.08	0	0.33
1398136	A372, K378	372	378	100%	10	10	1	0	1	0.74	1
2134859	A372, F374, S375, T376, F377, K378, Y380, S383, P384, G404, D405, R408, N437, V503, G504, Y508	372	508	100%	1	1	1	0	1	0.04	1
1599400	ASFSTFKCYGVSPTKLND	372	389	100%	32	7	2	0	0.22	0.11	0.36
1412560	ASFSTFKCYGVS	372	383	100%	1	0	0	1	0	0	0.94
2134858	A372, F374, S375, F377, K378, C379, Y380, S383, P384, G404, R408, Q414, V503, G504	372	504	100%	1	1	1	0	1	0.04	1
1874081	A369	372	372	100%	9	0	0	1	0	0	0.27
2130947	ASFSTFKCYGVSPTKLNDLCFT	372	393	100%	1	1	1	0	1	0.04	1
2061160	A372, S375, D405, R408, N437, N440, V503, Q506	372	506	100%	6	6	1	0	1	0.61	1
2116410	A369, P370, F372, F374, K375, C376, Y377, V379, S380, D402, E403, R405, Q406, A408, P409, Q411, T412, G413, N414	372	417	84.21%	1	1	1	0	1	0.04	1
2117556	ASFSTFKCYGVSPTK	372	386	100%	1	0	0	1	0	0	0.94
1313549	SFSTFKCYGVSPTKL	373	387	100%	99	2	2	3	0.02	0.01	0.07
1391917	SFSTFKCYGVSPTKLNDL	373	390	100%	15	0	0	1	0	0	0.17
1693086	SFSTFKCYGVSPTKLN	373	388	100%	40	0	0	1	0	0	0.07
1503812	SFSTFKCYGVSP	373	384	100%	18	6	1	1	0.33	0.16	0.54
1874194	S370	373	373	100%	9	0	0	1	0	0	0.27
1125016	F374, S375, T376, F377, C379, F392, D427, E516	374	516	100%	1	1	1	0	1	0.04	1
1309472	FSTFKCYGVSPTKLNDLCFT	374	393	100%	120	0	0	1	0	0	0.03
1658806	FSTFKCYGVSPTKLND	374	389	100%	20	1	1	0	0.05	0	0.21
1392550	F374, S375, T376, F377, K378, C379, Y380, G381, V382, S383, P384, T385, K386, R408, N437, V503, G504, Y508	374	508	100%	5	2	1	0	0.4	0.08	0.8
1329423	FSTFKCYGVSPT	374	385	100%	1	0	0	1	0	0	0.94
1595411	F374, S375, T376, F377, K378, C379, Y380, G381, V382, S383, P384, G404, D405, V407, R408, V503, G504	374	504	100%	1	1	1	0	1	0.04	1
1874103	F371	374	374	100%	9	0	0	1	0	0	0.27
2060766	F371, N436, S440, V442, R495, P496, T497, Y498, G499, V500, Q503	374	506	81.82%	5	5	1	0	1	0.55	1
1695906	STFKCYGVSPTKLNDL	375	390	100%	20	1	1	0	0.05	0	0.21
1389151	STFKCYGVSPTKLNDLCFTN	375	394	100%	7	1	1	1	0.14	0.01	0.5
1542598	STFKCYGVSPTKLND	375	389	100%	7	1	1	0	0.14	0.01	0.5
1860912	S52, R80, G81, D82, R85, V180, G181, Y182, Y185	375	508	100%	1	1	1	0	1	0.04	1
1874195	S372	375	375	100%	9	0	0	1	0	0	0.27
2116029	S375, T376, K378, C379, Y380, G381, V382, S383, T385, K386, R408, D427	375	427	100%	1	1	1	0	1	0.04	1
1310841	TFKCYGVSPTKLNDL	376	390	100%	110	12	7	2	0.11	0.06	0.18
1314092	T376, K378, R408, K417	376	417	100%	2	2	2	0	1	0.22	1
1697813	TFKCYGVSPTKLNDLC	376	391	100%	43	0	0	2	0	0	0.06
1542737	TFKCYGVSPTKLNDLCFTNV	376	395	100%	1	1	1	0	1	0.04	1
1862498	TFKCYGVSPTKLNDLCFTNVY	376	396	100%	1	0	0	1	0	0	0.94
1874208	T373	376	376	100%	9	0	0	1	0	0	0.27
1087513	FKCYGVSPTKLNDLCFTN	377	394	100%	20	0	0	1	0	0	0.13
1312438	FKCYGVSPTKLNDLC	377	391	100%	58	0	0	3	0	0	0.06
1335916	F377	377	377	100%	1	1	1	0	1	0.04	1
1335917	F377, E516	377	516	100%	1	1	1	0	1	0.04	1
1335918	F377, K386, L390	377	390	100%	1	1	1	0	1	0.04	1
1335919	F377, T385, L390	377	390	100%	1	1	1	0	1	0.04	1
1335920	F377, Y508, E516	377	516	100%	1	1	1	0	1	0.04	1
1657379	FKCYGVSPTKLNDLCF	377	392	100%	40	0	0	1	0	0	0.07
1874104	F374	377	377	100%	9	0	0	1	0	0	0.27
1311170	KCYGVSPTK	378	386	100%	76	58	9	1	0.76	0.66	0.84
[truncated: 4,454 more rows]

## Sheet: mhcpred
Cell.Line	Sequence	Seq.ID	start	end	Allele	EL_score	EL_Rank	Aff_Score	Aff_Rank	Aff_nM	Binder	Cell.Line_allele
JY	SIIAYTMSL	s0691-0699	691	699	HLA-B0702	0.112016	1.355	0.394094	1.011	703.29	WB	JY alleles
JY	SIIAYTMSL	s0691-0699	691	699	HLA-C0702	0.035421	1.279	0.354507	0.495	1079.33	WB	JY alleles
JY	SIIAYTMSL	s0691-0699	691	699	HLA-A0201	0.580032	0.3	0.721492	0.294	20.36	SB	JY alleles
JY	IPTNFTISV	s0714-0722	714	722	HLA-B0702	0.472945	0.418	0.516024	0.472	188.01	SB	JY alleles
JY	IPTNFTISV	s0714-0722	714	722	HLA-C0702	0.003274	5.472	0.133769	6.399	11759.6	NB	JY alleles
JY	IPTNFTISV	s0714-0722	714	722	HLA-A0201	0.00469	9.452	0.160093	13.56	8845	NB	JY alleles
JY	RLDKVEAEV	s0983-0991	983	991	HLA-B0702	0.003905	8.04	0.071875	18.199	22973.7	NB	JY alleles
JY	RLDKVEAEV	s0983-0991	983	991	HLA-C0702	0.001682	7.597	0.069925	18.834	23463.6	NB	JY alleles
JY	RLDKVEAEV	s0983-0991	983	991	HLA-A0201	0.825045	0.09	0.644689	0.618	46.73	SB	JY alleles
JY	RLQSLQTYV	s1000-1008	1000	1008	HLA-B0702	0.004845	7.273	0.128973	7.82	12386	NB	JY alleles
JY	RLQSLQTYV	s1000-1008	1000	1008	HLA-C0702	0.001864	7.251	0.141945	5.711	10764	NB	JY alleles
JY	RLQSLQTYV	s1000-1008	1000	1008	HLA-A0201	0.87376	0.062	0.770923	0.161	11.92	SB	JY alleles
JY	APHGVVFL	s1056-1063	1056	1063	HLA-B0702	0.572123	0.311	0.408214	0.928	603.65	SB	JY alleles
JY	APHGVVFL	s1056-1063	1056	1063	HLA-C0702	0.000598	12.37	0.05953	23.512	26256.7	NB	JY alleles
JY	APHGVVFL	s1056-1063	1056	1063	HLA-A0201	0.000312	27.806	0.044344	45.198	30945.6	NB	JY alleles
Raji	AIHVSGTNGTK	s0067-0077	67	77	HLA-B1510	1.2e-05	53.75	0.010172	60.899	44789.1	NB	Raji alleles
Raji	AIHVSGTNGTK	s0067-0077	67	77	HLA-C0304	1e-06	70	0.006815	77.18	46445.8	NB	Raji alleles
Raji	AIHVSGTNGTK	s0067-0077	67	77	HLA-C0401	4.1e-05	50.417	0.0212	63.691	39751.3	NB	Raji alleles
Raji	AIHVSGTNGTK	s0067-0077	67	77	HLA-A0301	0.414262	0.607	0.419495	1.214	534.29	WB	Raji alleles
Raji	GVYFASTEK	s0089-0097	89	97	HLA-B1510	6.2e-05	32.4	0.011311	55.917	44240.5	NB	Raji alleles
Raji	GVYFASTEK	s0089-0097	89	97	HLA-C0304	0.00012	18.524	0.03896	26.394	32801.8	NB	Raji alleles
Raji	GVYFASTEK	s0089-0097	89	97	HLA-C0401	0.000543	18.646	0.049817	20.616	29166.3	NB	Raji alleles
Raji	GVYFASTEK	s0089-0097	89	97	HLA-A0301	0.918399	0.034	0.727116	0.054	19.15	SB	Raji alleles
Raji	TLKSFTVEK	s0302-0310	302	310	HLA-B1510	9e-05	28.444	0.013558	47.632	43177.9	NB	Raji alleles
Raji	TLKSFTVEK	s0302-0310	302	310	HLA-C0304	6.6e-05	22.222	0.024453	38.055	38376.6	NB	Raji alleles
Raji	TLKSFTVEK	s0302-0310	302	310	HLA-C0401	0.003784	6.638	0.065963	11.262	24491.3	NB	Raji alleles
Raji	TLKSFTVEK	s0302-0310	302	310	HLA-A0301	0.926974	0.03	0.705758	0.078	24.13	SB	Raji alleles
Raji	VLYNSASFSTFK	s0367-0378	367	378	HLA-B1510	1e-06	90	0.012183	52.528	43825.1	NB	Raji alleles
Raji	VLYNSASFSTFK	s0367-0378	367	378	HLA-C0304	1e-06	70	0.026724	35.653	37445.1	NB	Raji alleles
Raji	VLYNSASFSTFK	s0367-0378	367	378	HLA-C0401	5.1e-05	47	0.060849	13.661	25884.7	NB	Raji alleles
Raji	VLYNSASFSTFK	s0367-0378	367	378	HLA-A0301	0.764316	0.152	0.813392	0.011	7.53	SB	Raji alleles
Raji	LYNSASFSTFK	s0368-0378	368	378	HLA-B1510	1e-05	56.25	0.016394	39.321	41873.1	NB	Raji alleles
Raji	LYNSASFSTFK	s0368-0378	368	378	HLA-C0304	4e-06	47	0.025153	37.303	38087	NB	Raji alleles
Raji	LYNSASFSTFK	s0368-0378	368	378	HLA-C0401	0.000229	27.05	0.064121	12.077	24984.3	NB	Raji alleles
Raji	LYNSASFSTFK	s0368-0378	368	378	HLA-A0301	0.075458	2.272	0.474145	0.831	295.79	NB	Raji alleles
Raji	NSASFSTFK	s0370-0378	370	378	HLA-B1510	2.8e-05	42	0.016082	40.144	42014.7	NB	Raji alleles
Raji	NSASFSTFK	s0370-0378	370	378	HLA-C0304	0.000128	18.143	0.052499	20.195	28332.1	NB	Raji alleles
Raji	NSASFSTFK	s0370-0378	370	378	HLA-C0401	0.000899	14.718	0.086004	5.543	19717	NB	Raji alleles
Raji	NSASFSTFK	s0370-0378	370	378	HLA-A0301	0.348642	0.742	0.562754	0.418	113.4	WB	Raji alleles
Raji	SASFSTFK	s0371-0378	371	378	HLA-B1510	1.7e-05	48.5	0.009031	66.427	45345.4	NB	Raji alleles
Raji	SASFSTFK	s0371-0378	371	378	HLA-C0304	1.6e-05	33	0.022758	40.065	39086.9	NB	Raji alleles
Raji	SASFSTFK	s0371-0378	371	378	HLA-C0401	0.000184	29.562	0.041592	28.169	31880.9	NB	Raji alleles
Raji	SASFSTFK	s0371-0378	371	378	HLA-A0301	0.012321	5.07	0.254399	3.396	3188.28	NB	Raji alleles
Raji	KCYGVSPTKL	s0378-0387	378	387	HLA-B1510	0.000399	15.875	0.023678	25.278	38699.7	NB	Raji alleles
Raji	KCYGVSPTKL	s0378-0387	378	387	HLA-C0304	0.003107	5.789	0.110737	9.047	15087.6	NB	Raji alleles
Raji	KCYGVSPTKL	s0378-0387	378	387	HLA-C0401	0.0019	9.926	0.055742	16.48	27355.2	NB	Raji alleles
Raji	KCYGVSPTKL	s0378-0387	378	387	HLA-A0301	0.018071	4.331	0.142155	7.898	10739.6	NB	Raji alleles
Raji	YGVSPTKL	s0380-0387	380	387	HLA-B1510	0.004979	4.443	0.036217	13.705	33789.9	NB	Raji alleles
Raji	YGVSPTKL	s0380-0387	380	387	HLA-C0304	0.114769	0.87	0.222762	3.337	4489.71	WB	Raji alleles
Raji	YGVSPTKL	s0380-0387	380	387	HLA-C0401	0.021494	2.138	0.073048	8.708	22684	NB	Raji alleles
Raji	YGVSPTKL	s0380-0387	380	387	HLA-A0301	2.2e-05	57.857	0.015043	86.12	42489.7	NB	Raji alleles
Raji	RQIAPGQTGK	s0408-0417	408	417	HLA-B1510	0.000255	19.125	0.021732	28.275	39523.2	NB	Raji alleles
Raji	RQIAPGQTGK	s0408-0417	408	417	HLA-C0304	4.5e-05	24.857	0.022955	39.821	39003.6	NB	Raji alleles
Raji	RQIAPGQTGK	s0408-0417	408	417	HLA-C0401	0.002667	8.221	0.058211	15.052	26634.1	NB	Raji alleles
Raji	RQIAPGQTGK	s0408-0417	408	417	HLA-A0301	0.904489	0.04	0.639078	0.198	49.65	SB	Raji alleles
Raji	GVLTESNKK	s0550-0558	550	558	HLA-B1510	1e-05	56.25	0.004485	91.96	47631.6	NB	Raji alleles
Raji	GVLTESNKK	s0550-0558	550	558	HLA-C0304	4e-06	47	0.006769	77.374	46468.9	NB	Raji alleles
Raji	GVLTESNKK	s0550-0558	550	558	HLA-C0401	0.000147	32.273	0.020023	66.847	40260.8	NB	Raji alleles
Raji	GVLTESNKK	s0550-0558	550	558	HLA-A0301	0.452652	0.536	0.393382	1.43	708.73	WB	Raji alleles
Raji	RVYSTGSNVFQTR	s0634-0646	634	646	HLA-B1510	7e-06	60	0.010355	60.033	44700.5	NB	Raji alleles
Raji	RVYSTGSNVFQTR	s0634-0646	634	646	HLA-C0304	3e-06	50	0.022973	39.799	38996	NB	Raji alleles
Raji	RVYSTGSNVFQTR	s0634-0646	634	646	HLA-C0401	8.3e-05	39.833	0.044206	25.413	30991.8	NB	Raji alleles
Raji	RVYSTGSNVFQTR	s0634-0646	634	646	HLA-A0301	0.398774	0.638	0.467928	0.873	316.37	WB	Raji alleles
Raji	SIIAYTMSL	s0691-0699	691	699	HLA-B1510	0.011831	2.649	0.140264	0.963	10961.6	NB	Raji alleles
Raji	SIIAYTMSL	s0691-0699	691	699	HLA-C0304	0.431135	0.268	0.704794	0.111	24.39	SB	Raji alleles
Raji	SIIAYTMSL	s0691-0699	691	699	HLA-C0401	0.025222	1.868	0.145772	1.007	10327.4	WB	Raji alleles
Raji	SIIAYTMSL	s0691-0699	691	699	HLA-A0301	0.010084	5.506	0.19613	5.057	5989.09	NB	Raji alleles
Raji	NRALTGIAV	s0764-0772	764	772	HLA-B1510	0.246111	0.203	0.26241	0.182	2923.57	SB	Raji alleles
Raji	NRALTGIAV	s0764-0772	764	772	HLA-C0304	0.00079	9.779	0.096247	10.659	17648.5	NB	Raji alleles
Raji	NRALTGIAV	s0764-0772	764	772	HLA-C0401	0.003885	6.52	0.085328	5.681	19861.7	NB	Raji alleles
Raji	NRALTGIAV	s0764-0772	764	772	HLA-A0301	8.2e-05	36.667	0.026997	62.21	37334.7	NB	Raji alleles
Raji	VTYVPAQEK	s1065-1073	1065	1073	HLA-B1510	8.6e-05	28.889	0.011101	56.82	44341.1	NB	Raji alleles
Raji	VTYVPAQEK	s1065-1073	1065	1073	HLA-C0304	0.001693	7.328	0.069779	15.18	23500.7	NB	Raji alleles
Raji	VTYVPAQEK	s1065-1073	1065	1073	HLA-C0401	0.004793	5.771	0.053422	17.985	28050.6	NB	Raji alleles
Raji	VTYVPAQEK	s1065-1073	1065	1073	HLA-A0301	0.932408	0.027	0.660915	0.154	39.21	SB	Raji alleles
Raji	TYVPAQEK	s1066-1073	1066	1073	HLA-B1510	5.2e-05	34.5	0.008145	71.104	45782.2	NB	Raji alleles
Raji	TYVPAQEK	s1066-1073	1066	1073	HLA-C0304	5e-06	45	0.009444	67.377	45143.3	NB	Raji alleles
Raji	TYVPAQEK	s1066-1073	1066	1073	HLA-C0401	0.000796	15.595	0.028882	46.308	36580.9	NB	Raji alleles
Raji	TYVPAQEK	s1066-1073	1066	1073	HLA-A0301	0.016067	4.533	0.14793	7.459	10089.1	NB	Raji alleles
Raji	VYDPLQPEL	s1137-1145	1137	1145	HLA-B1510	0.293057	0.165	0.130967	1.121	12121.6	SB	Raji alleles
Raji	VYDPLQPEL	s1137-1145	1137	1145	HLA-C0304	0.281573	0.411	0.209824	3.688	5164.32	SB	Raji alleles
Raji	VYDPLQPEL	s1137-1145	1137	1145	HLA-C0401	0.98901	0.001	0.51678	0.009	186.48	SB	Raji alleles
Raji	VYDPLQPEL	s1137-1145	1137	1145	HLA-A0301	0.009018	5.786	0.048264	34.179	29660.5	NB	Raji alleles
Raji	PLQPELDSFK	s1140-1149	1140	1149	HLA-B1510	2e-06	80	0.005071	88.945	47330.6	NB	Raji alleles
Raji	PLQPELDSFK	s1140-1149	1140	1149	HLA-C0304	0	100	0.005609	82.454	47055.8	NB	Raji alleles
Raji	PLQPELDSFK	s1140-1149	1140	1149	HLA-C0401	7.3e-05	41.6	0.026527	51.115	37525	NB	Raji alleles
Raji	PLQPELDSFK	s1140-1149	1140	1149	HLA-A0301	0.028345	3.562	0.250071	3.483	3341.13	NB	Raji alleles
Raji	PLQPELDSF	s1140-1148	1140	1148	HLA-B1510	0.000135	24.5	0.012958	49.654	43459.1	NB	Raji alleles
Raji	PLQPELDSF	s1140-1148	1140	1148	HLA-C0304	4.4e-05	25	0.017611	47.6	41325.3	NB	Raji alleles
Raji	PLQPELDSF	s1140-1148	1140	1148	HLA-C0401	0.004988	5.637	0.045971	23.793	30405.6	NB	Raji alleles
Raji	PLQPELDSF	s1140-1148	1140	1148	HLA-A0301	0.00014	29.846	0.022555	70.8	39172.8	NB	Raji alleles
